# Supplementary material
Source: MDPI journal article supplement (https://www.mdpi.com/2075-163X/8/5/218)
Supplement: s1 [file s1]

#=======================================================================
data_global

_audit_update_record
;
2017-09-05 # Formatted by publCIF
;
#=======================================================================

_audit_creation_method                   'Jana2006 Version : 29/08/2017'


# 1. PROCESSING SUMMARY (IUCr Office Use Only)

_journal_date_recd_electronic            ?
_journal_date_to_coeditor                ?
_journal_date_from_coeditor              ?
_journal_date_accepted                   ?
_journal_date_printers_first             ?
_journal_date_printers_final             ?
_journal_date_proofs_out                 ?
_journal_date_proofs_in                  ?
_journal_coeditor_name                   ?
_journal_coeditor_code                   ?
_journal_coeditor_notes
?
_journal_techeditor_code                 ?
_journal_paper_category                  ?
_journal_techeditor_notes
?
_journal_coden_ASTM                      ?
_journal_name_full                       'Acta Crystallographica Section C'
_journal_year                            ?
_journal_volume                          ?
_journal_issue                           ?
_journal_page_first                      ?
_journal_page_last                       ?
_journal_suppl_publ_number               ?
_journal_suppl_publ_pages                ?

#=======================================================================

# 2. SUBMISSION DETAILS

_publ_contact_author_name                ?
_publ_contact_author_address
?
_publ_contact_author_email               ?
_publ_contact_author_fax                 ?
_publ_contact_author_phone               ?

_publ_requested_journal                  'Acta Crystallographica Section C'
_publ_requested_category                 ?

_publ_contact_letter
?

#=======================================================================

# 3. TITLE AND AUTHOR LIST

_publ_section_title
;
Title (type here to add)
;


_publ_section_title_footnote
.
loop_
 _publ_author_name
 _publ_author_footnote
 _publ_author_address
; ?      # name
;
; ?      # footnote
;
; ?      # address
;

#=======================================================================

# 4. TEXT

_publ_section_synopsis
.
_publ_section_abstract
;
(type here to add abstract)
;

_publ_section_comment
;
(type here to add)
;

_publ_section_introduction
?
_publ_section_experimental
?
_publ_section_exptl_prep
;
(type here to add preparation details)
;

_publ_section_exptl_refinement
;
(type here to add refinement details)
;

_publ_section_exptl_solution
?
_publ_section_discussion
?
_publ_section_acknowledgements
;
(type here to add acknowledgements)
;

_publ_section_references
;
Petricek, V., Dusek, M. & Palatinus, L. (2006). Jana2006. Structure
Determination Software Programs. Institute of Physics, Praha, Czech Republic.

Palatinus, L. & Chapuis, G. (2007). J. Appl. Cryst. 40, 786-790.

# enable this reference if Diamond ver. 2 was used for visualization
#Brandenburg, K. (1999). <i>DIAMOND</i>. Version. 2.1c. #Crystal Impact GbR,
Bonn, Germany.

# enable this reference if Diamond ver. 3 was used for visualization
#Brandenburg, K. & Putz, H. (2005). <i>DIAMOND</i> Version 3. #Crystal Impact
GbR, Postfach 1251, D-53002 Bonn, Germany.

# enable this reference if <i>SIR97</i> was used for solving of the structure
#Altomare, A., Burla, M. C., Camalli, M., Cascarano, G., Giacovazzo, C.,
#Guagliardi, A., Moliterni, A. G. G., Polidori, G., Spagna, R. (1997).
#<i>SIR97</i>. A Package for Crystal Structure Solution by Direct Methods #and
Refinement, Bari, Rome, Italy.

# use this reference if <i>SIR2002</i> was used for solving of the structure
#Burla, M.C., Camalli, M., Carrozzini, B., Cascarano, G., Giacovazzo, C.,
#Polidori, G., Spagna, R. #<i>SIR2002</i>: the program, J. Appl. Cryst,
(2003). 36, 1103

# enable this reference if bond valences were calculated #Brown, I. D. (1996).
J. Appl. Cryst. 29, 479-480.

# enable this reference if <i>X-SHAPE</i> wase used for crystal shape
refinement #Stoe & Cie (1998). <i>X-SHAPE</i>. Stoe & Cie, Darmstadt, Germany.

# enable this reference if Flack coefficient was refined #Flack, H. D. (1983).
Acta Cryst. A39, 876-881.
;
_publ_section_figure_captions
;

;

_publ_section_table_legends
?

#=======================================================================
data_I


_refine_ls_matrix_type   full
#Added by publCIF


#=======================================================================

# 5. CHEMICAL DATA

_chemical_name_systematic
?
_chemical_name_common                    ?
_chemical_formula_moiety                 ?
_chemical_formula_structural             ?
_chemical_formula_analytical             ?
_chemical_formula_iupac                  ?
_chemical_formula_sum
'As2.185 Hg2 Mn8 Pb1.438 S48 Sb18.732 Tl9.606'
_chemical_formula_weight                 7085.1
_chemical_melting_point                  ?
_chemical_compound_source                ?
_chemical_absolute_configuration         .

#=======================================================================

# 6. CRYSTAL DATA

_symmetry_cell_setting                   monoclinic
_symmetry_space_group_name_H-M           'C 1 2/m 1'
_symmetry_space_group_name_Hall          '-C 2y'
_symmetry_Int_Tables_number              12

loop_
 _space_group_symop_id
 _space_group_symop_operation_xyz
 1   x,y,z
 2   -x,y,-z
 3   -x,-y,-z
 4   x,-y,z
 5   x+1/2,y+1/2,z
 6   -x+1/2,y+1/2,-z
 7   -x+1/2,-y+1/2,-z
 8   x+1/2,-y+1/2,z

_cell_length_a                           21.362
_cell_length_b                           3.8579
_cell_length_c                           27.135
_cell_angle_alpha                        90
_cell_angle_beta                         106.944
_cell_angle_gamma                        90
_cell_volume                             2139.186

loop_
 _twin_individual_id
 _twin_individual_mass_fraction_refined
 _twin_individual_twin_matrix_11
 _twin_individual_twin_matrix_12
 _twin_individual_twin_matrix_13
 _twin_individual_twin_matrix_21
 _twin_individual_twin_matrix_22
 _twin_individual_twin_matrix_23
 _twin_individual_twin_matrix_31
 _twin_individual_twin_matrix_32
 _twin_individual_twin_matrix_33
 ? ? ? ? ? ? ? ? ? ? ?

_cell_formula_units_Z                    1

_cell_measurement_reflns_used            514
_cell_measurement_theta_min              3.84
_cell_measurement_theta_max              21.56
_cell_measurement_temperature            285(17)
_cell_special_details
?

_exptl_crystal_density_diffrn            5.4998
_exptl_crystal_density_meas              ?
_exptl_crystal_density_method            ?
_exptl_crystal_F_000                     3051

_exptl_absorpt_coefficient_mu            33.355
_exptl_crystal_description               ?
_exptl_crystal_size_max                  0.032
_exptl_crystal_size_mid                  0.017
_exptl_crystal_size_min                  0.007
_exptl_crystal_size_rad                  ?
_exptl_crystal_colour                    black
_exptl_absorpt_correction_type           multi-scan
_exptl_absorpt_process_details
;
CrysAlisPro 1.171.38.43 (Rigaku Oxford Diffraction, 2015)
Empirical absorption correction using spherical harmonics,
 implemented in SCALE3 ABSPACK scaling algorithm.
;
_exptl_absorpt_correction_T_min          0.782
_exptl_absorpt_correction_T_max          1
loop_
 _exptl_crystal_face_index_h
 _exptl_crystal_face_index_k
 _exptl_crystal_face_index_l
 _exptl_crystal_face_perp_dist
 ? ? ? ?

#=======================================================================

# 7. EXPERIMENTAL DATA

_exptl_special_details                   ?

_diffrn_ambient_temperature              285
_diffrn_source                           'micro-focus sealed X-ray tube'
_diffrn_source_power                     ?
_diffrn_source_voltage                   ?
_diffrn_source_current                   ?
_diffrn_radiation_type                   'Mo K\a'
_diffrn_radiation_source                 'X-ray tube'
_diffrn_radiation_wavelength             0.71073
_diffrn_radiation_monochromator          'mirror'
_diffrn_measurement_device               'four-circle diffractometer'
_diffrn_measurement_device_type          'SuperNova, Dual, Cu at zero, AtlasS2'
_diffrn_detector                         'CCD plate'
_diffrn_detector_area_resol_mean         5.2027
_diffrn_measurement_method               '\w scans'
_diffrn_measurement_specimen_support     ?

_diffrn_reflns_number                    4684
_diffrn_reflns_theta_min                 3.5
_diffrn_reflns_theta_max                 27.14
_diffrn_reflns_theta_full                25.35
_diffrn_measured_fraction_theta_max      0.89
_diffrn_measured_fraction_theta_full     0.98
_diffrn_reflns_av_R_equivalents          0.1048
_diffrn_reflns_av_unetI/netI             0.1835
_diffrn_reflns_limit_h_min               -26
_diffrn_reflns_limit_h_max               26
_diffrn_reflns_limit_k_min               -4
_diffrn_reflns_limit_k_max               4
_diffrn_reflns_limit_l_min               -34
_diffrn_reflns_limit_l_max               17
_diffrn_reflns_reduction_process         ?

_diffrn_standards_number                 ?
_diffrn_standards_interval_count         ?
_diffrn_standards_interval_time          ?
_diffrn_standards_decay_%                ?
loop_
_diffrn_standard_refln_index_h
_diffrn_standard_refln_index_k
_diffrn_standard_refln_index_l
  ? ? ?

_diffrn_radiation_probe                  x-ray

#=======================================================================

# 8. REFINEMENT DATA

_refine_special_details
?

_reflns_number_total                     2403
_reflns_number_gt                        957
_reflns_threshold_expression             'I>3\s(I)'

_refine_ls_structure_factor_coef         Fsqd
_refine_ls_R_factor_gt                   0.0607
_refine_ls_wR_factor_gt                  0.0943
_refine_ls_R_factor_all                  0.1757
_refine_ls_wR_factor_ref                 0.1452
_refine_ls_goodness_of_fit_ref           1.07
_refine_ls_goodness_of_fit_gt            1.14
_refine_ls_restrained_S_gt               ?
_refine_ls_restrained_S_all              ?
_refine_ls_number_reflns                 2403
_refine_ls_number_parameters             142
_refine_ls_number_restraints             0
_refine_ls_number_constraints            24
_refine_ls_weighting_scheme              sigma
_refine_ls_weighting_details             'w=1/(\s^2^(I)+0.0001800964I^2^)'
_refine_ls_hydrogen_treatment            ?
_refine_ls_shift/su_max                  0.0150
_refine_ls_shift/su_mean                 0.0017
_refine_diff_density_max                 7.32
_refine_diff_density_min                 -7.76
_refine_ls_extinction_method             'none'
_refine_ls_extinction_coef               ?
_refine_ls_abs_structure_details         ?
_refine_ls_abs_structure_Flack           ?
_refine_ls_abs_structure_Rogers          ?

loop_
 _atom_type_symbol
 _atom_type_scat_dispersion_real
 _atom_type_scat_dispersion_imag
 _atom_type_scat_source
 As   0.0499  2.0058
 'International Tables Vol C tables 4.2.6.8 and 6.1.1.1'
 Hg  -2.3894  9.2266
 'International Tables Vol C tables 4.2.6.8 and 6.1.1.1'
 Mn   0.3368  0.7283
 'International Tables Vol C tables 4.2.6.8 and 6.1.1.1'
 Pb  -3.3944 10.1111
 'International Tables Vol C tables 4.2.6.8 and 6.1.1.1'
 S    0.1246  0.1234
 'International Tables Vol C tables 4.2.6.8 and 6.1.1.1'
 Sb  -0.5866  1.5461
 'International Tables Vol C tables 4.2.6.8 and 6.1.1.1'
 Tl  -2.8358  9.6688
 'International Tables Vol C tables 4.2.6.8 and 6.1.1.1'

_computing_data_collection
 'CrysAlisPro 1.171.38.43 (Rigaku OD, 2015)'
_computing_cell_refinement
 'CrysAlisPro 1.171.38.43 (Rigaku OD, 2015)'
_computing_data_reduction
 'CrysAlisPro 1.171.38.43 (Rigaku OD, 2015)'
_computing_structure_solution            ?
_computing_structure_refinement          ?
_computing_molecular_graphics            ?
_computing_publication_material          ?

loop_
 _restr_distance_atom_site_label_1
 _restr_distance_site_symmetry_1
 _restr_distance_atom_site_label_2
 _restr_distance_site_symmetry_2
 _restr_distance_target
 _restr_distance_target_weight_param
 ? ? ? ? ? ?

loop_
 _restr_angle_atom_site_label_1
 _restr_angle_site_symmetry_1
 _restr_angle_atom_site_label_2
 _restr_angle_site_symmetry_2
 _restr_angle_atom_site_label_3
 _restr_angle_site_symmetry_3
 _restr_angle_target
 _restr_angle_target_weight_param
 ? ? ? ? ? ? ? ?

loop_
 _restr_torsion_atom_site_label_1
 _restr_torsion_site_symmetry_1
 _restr_torsion_atom_site_label_2
 _restr_torsion_site_symmetry_2
 _restr_torsion_atom_site_label_3
 _restr_torsion_site_symmetry_3
 _restr_torsion_atom_site_label_4
 _restr_torsion_site_symmetry_4
 _restr_torsion_angle_target
 _restr_torsion_weight_param
 ? ? ? ? ? ? ? ? ? ?

loop_
 _restr_equal_distance_atom_site_label_1
 _restr_equal_distance_site_symmetry_1
 _restr_equal_distance_atom_site_label_2
 _restr_equal_distance_site_symmetry_2
 _restr_equal_distance_class_class_id
 _restr_equal_distance_class_target_weight_param
 ? ? ? ? ? ?

loop_
 _restr_equal_angle_atom_site_label_1
 _restr_equal_angle_site_symmetry_1
 _restr_equal_angle_atom_site_label_2
 _restr_equal_angle_site_symmetry_2
 _restr_equal_angle_atom_site_label_3
 _restr_equal_angle_site_symmetry_3
 _restr_equal_angle_class_class_id
 _restr_equal_angle_class_target_weight_param
 ? ? ? ? ? ? ? ?

loop_
 _restr_equal_torsion_atom_site_label_1
 _restr_equal_torsion_site_symmetry_1
 _restr_equal_torsion_atom_site_label_2
 _restr_equal_torsion_site_symmetry_2
 _restr_equal_torsion_atom_site_label_3
 _restr_equal_torsion_site_symmetry_3
 _restr_equal_torsion_atom_site_label_4
 _restr_equal_torsion_site_symmetry_4
 _restr_equal_torsion_class_class_id
 _restr_equal_torsion_class_target_weight_param
 ? ? ? ? ? ? ? ? ? ?


#=======================================================================

# 9. ATOMIC COORDINATES AND DISPLACEMENT PARAMETERS

loop_
 _atom_site_label
 _atom_site_type_symbol
 _atom_site_fract_x
 _atom_site_fract_y
 _atom_site_fract_z
 _atom_site_adp_type
 _atom_site_U_iso_or_equiv
 _atom_site_site_symmetry_multiplicity
 _atom_site_occupancy
 _atom_site_calc_flag
 _atom_site_refinement_flags
 _atom_site_disorder_assembly
 _atom_site_disorder_group
  Hg1 Hg 0.5 2 0.5 Uani 0.0243(9) 2 1 d . . .
  Tl1 Tl 0.61255(10) 0.5 0.64328(7) Uani 0.0360(8) 4 1 d . . .
  Tl2 Tl 0.35428(9) 0.5 0.81477(8) Uani 0.0362(8) 4 0.990(7) d . . .
  Sb1 Sb 0.28499(15) 1 0.45391(11) Uani 0.0259(11) 4 1 d . . .
  Sb2 Sb 0.33573(19) 1 0.67105(12) Uani 0.0415(14) 4 1 d . . .
  Sb3 Sb 0.4110(2) 0 0.97915(15) Uani 0.081(2) 4 0.64(2) d . . .
  Sb3' Pb 0.4110(2) 0 0.97915(15) Uani 0.081(2) 4 0.36(2) d . . .
  Sb4 Sb 0.53848(18) 1 0.87986(13) Uani 0.0442(17) 4 0.77(3) d . . .
  Sb4' As 0.53848(18) 1 0.87986(13) Uani 0.0442(17) 4 0.23(3) d . . .
  Sb5 Sb 0.67441(18) 1 0.78772(15) Uani 0.0427(17) 4 0.68(3) d . . .
  Sb5' As 0.67441(18) 1 0.78772(15) Uani 0.0427(17) 4 0.32(3) d . . .
  Sb6 Sb 0.2295(2) -0.5 0.92414(15) Uani 0.091(2) 4 0.59(2) d . . .
  Sb6' Tl 0.2295(2) -0.5 0.92414(15) Uani 0.091(2) 4 0.41(2) d . . .
  Mn1 Mn 0.4134(3) 1.5 0.5777(2) Uani 0.023(2) 4 1 d . . .
  Mn2 Mn 0.5162(3) 1.5 0.7581(2) Uani 0.022(2) 4 1 d . . .
  S1 S 0.4924(5) 2 0.5836(4) Uani 0.021(4) 4 1 d . . .
  S2 S 0.5745(5) 1 0.7221(4) Uani 0.020(4) 4 1 d . . .
  S3 S 0.4225(5) 1.5 0.6753(4) Uani 0.024(4) 4 1 d . . .
  S4 S 0.3232(5) 1 0.5780(4) Uani 0.020(4) 4 1 d . . .
  S5 S 0.3698(5) 1.5 0.4759(4) Uani 0.023(4) 4 1 d . . .
  S6 S 0.2750(5) 1 0.3625(4) Uani 0.024(4) 4 1 d . . .
  S7 S 0.4610(6) 1 0.7970(4) Uani 0.026(4) 4 1 d . . .
  S8 S 0.7220(6) 0.5 0.7473(4) Uani 0.037(5) 4 1 d . . .
  S9 S 0.6079(6) 1.5 0.8437(4) Uani 0.044(5) 4 1 d . . .
  S10 S 0.3047(7) 0 0.8969(5) Uani 0.047(6) 4 1 d . . .
  S11 S 0.3311(8) -0.5 1.0129(5) Uani 0.062(6) 4 1 d . . .
  S12 S 0.4678(9) 0.5 0.9152(6) Uani 0.080(8) 4 1 d . . .

loop_
 _atom_site_aniso_label
 _atom_site_aniso_type_symbol
 _atom_site_aniso_U_11
 _atom_site_aniso_U_22
 _atom_site_aniso_U_33
 _atom_site_aniso_U_12
 _atom_site_aniso_U_13
 _atom_site_aniso_U_23
 Hg1 Hg 0.0274(15) 0.0239(16) 0.0239(14) 0 0.0111(12) 0
 Tl1 Tl 0.0448(13) 0.0320(13) 0.0361(11) 0 0.0194(11) 0
 Tl2 Tl 0.0324(12) 0.0313(13) 0.0454(14) 0 0.0122(10) 0
 Sb1 Sb 0.0309(18) 0.0223(19) 0.0231(16) 0 0.0058(15) 0
 Sb2 Sb 0.077(3) 0.019(2) 0.0299(19) 0 0.018(2) 0
 Sb3 Sb 0.121(4) 0.049(3) 0.112(4) 0 0.094(3) 0
 Sb3' Pb 0.121(4) 0.049(3) 0.112(4) 0 0.094(3) 0
 Sb4 Sb 0.044(3) 0.057(3) 0.025(2) 0 0.001(2) 0
 Sb4' As 0.044(3) 0.057(3) 0.025(2) 0 0.001(2) 0
 Sb5 Sb 0.026(2) 0.050(3) 0.046(3) 0 0.000(2) 0
 Sb5' As 0.026(2) 0.050(3) 0.046(3) 0 0.000(2) 0
 Sb6 Sb 0.173(5) 0.034(2) 0.112(3) 0 0.116(3) 0
 Sb6' Tl 0.173(5) 0.034(2) 0.112(3) 0 0.116(3) 0
 Mn1 Mn 0.024(4) 0.022(4) 0.022(4) 0 0.006(3) 0
 Mn2 Mn 0.023(4) 0.026(4) 0.018(3) 0 0.006(3) 0
 S1 S 0.031(6) 0.023(7) 0.016(5) 0 0.015(5) 0
 S2 S 0.025(6) 0.020(6) 0.015(5) 0 0.007(5) 0
 S3 S 0.018(6) 0.029(7) 0.021(6) 0 -0.002(5) 0
 S4 S 0.033(7) 0.018(6) 0.010(5) 0 0.007(5) 0
 S5 S 0.019(6) 0.022(7) 0.033(7) 0 0.012(6) 0
 S6 S 0.033(7) 0.021(7) 0.018(6) 0 0.005(6) 0
 S7 S 0.036(7) 0.020(7) 0.021(6) 0 0.005(6) 0
 S8 S 0.025(7) 0.053(9) 0.031(7) 0 0.004(6) 0
 S9 S 0.050(9) 0.053(10) 0.019(6) 0 -0.006(7) 0
 S10 S 0.045(9) 0.058(11) 0.033(7) 0 0.001(7) 0
 S11 S 0.096(13) 0.029(9) 0.035(8) 0 -0.021(8) 0
 S12 S 0.104(14) 0.016(8) 0.079(11) 0 -0.037(11) 0

loop_
 _jana_atom_site_ADP_C_label
 _jana_atom_site_ADP_C_type_symbol
 _jana_atom_site_ADP_C_111
 _jana_atom_site_ADP_C_112
 _jana_atom_site_ADP_C_113
 _jana_atom_site_ADP_C_122
 _jana_atom_site_ADP_C_123
 _jana_atom_site_ADP_C_133
 _jana_atom_site_ADP_C_222
 _jana_atom_site_ADP_C_223
 _jana_atom_site_ADP_C_233
 _jana_atom_site_ADP_C_333
 ? ? ? ? ? ? ? ? ? ? ? ?

loop_
 _jana_atom_site_ADP_D_label
 _jana_atom_site_ADP_D_type_symbol
 _jana_atom_site_ADP_D_1111
 _jana_atom_site_ADP_D_1112
 _jana_atom_site_ADP_D_1113
 _jana_atom_site_ADP_D_1122
 _jana_atom_site_ADP_D_1123
 _jana_atom_site_ADP_D_1133
 _jana_atom_site_ADP_D_1222
 _jana_atom_site_ADP_D_1223
 _jana_atom_site_ADP_D_1233
 _jana_atom_site_ADP_D_1333
 _jana_atom_site_ADP_D_2222
 _jana_atom_site_ADP_D_2223
 _jana_atom_site_ADP_D_2233
 _jana_atom_site_ADP_D_2333
 _jana_atom_site_ADP_D_3333
 ? ? ? ? ? ? ? ? ? ? ? ? ? ? ? ? ?

loop_
 _jana_atom_site_ADP_E_label
 _jana_atom_site_ADP_E_type_symbol
 _jana_atom_site_ADP_E_11111
 _jana_atom_site_ADP_E_11112
 _jana_atom_site_ADP_E_11113
 _jana_atom_site_ADP_E_11122
 _jana_atom_site_ADP_E_11123
 _jana_atom_site_ADP_E_11133
 _jana_atom_site_ADP_E_11222
 _jana_atom_site_ADP_E_11223
 _jana_atom_site_ADP_E_11233
 _jana_atom_site_ADP_E_11333
 _jana_atom_site_ADP_E_12222
 _jana_atom_site_ADP_E_12223
 _jana_atom_site_ADP_E_12233
 _jana_atom_site_ADP_E_12333
 _jana_atom_site_ADP_E_13333
 _jana_atom_site_ADP_E_22222
 _jana_atom_site_ADP_E_22223
 _jana_atom_site_ADP_E_22233
 _jana_atom_site_ADP_E_22333
 _jana_atom_site_ADP_E_23333
 _jana_atom_site_ADP_E_33333
 ? ? ? ? ? ? ? ? ? ? ? ? ? ? ? ? ? ? ? ? ? ? ?

loop_
 _jana_atom_site_ADP_F_label
 _jana_atom_site_ADP_F_type_symbol
 _jana_atom_site_ADP_F_111111
 _jana_atom_site_ADP_F_111112
 _jana_atom_site_ADP_F_111113
 _jana_atom_site_ADP_F_111122
 _jana_atom_site_ADP_F_111123
 _jana_atom_site_ADP_F_111133
 _jana_atom_site_ADP_F_111222
 _jana_atom_site_ADP_F_111223
 _jana_atom_site_ADP_F_111233
 _jana_atom_site_ADP_F_111333
 _jana_atom_site_ADP_F_112222
 _jana_atom_site_ADP_F_112223
 _jana_atom_site_ADP_F_112233
 _jana_atom_site_ADP_F_112333
 _jana_atom_site_ADP_F_113333
 _jana_atom_site_ADP_F_122222
 _jana_atom_site_ADP_F_122223
 _jana_atom_site_ADP_F_122233
 _jana_atom_site_ADP_F_122333
 _jana_atom_site_ADP_F_123333
 _jana_atom_site_ADP_F_133333
 _jana_atom_site_ADP_F_222222
 _jana_atom_site_ADP_F_222223
 _jana_atom_site_ADP_F_222233
 _jana_atom_site_ADP_F_222333
 _jana_atom_site_ADP_F_223333
 _jana_atom_site_ADP_F_233333
 _jana_atom_site_ADP_F_333333
 ? ? ? ? ? ? ? ? ? ? ? ? ? ? ? ? ? ? ? ? ? ? ? ? ? ? ? ? ? ?


#=======================================================================

# 10. MOLECULAR GEOMETRY


loop_
 _geom_bond_atom_site_label_1
 _geom_bond_atom_site_label_2
 _geom_bond_site_symmetry_1
 _geom_bond_site_symmetry_2
 _geom_bond_distance
 _geom_bond_publ_flag
  Hg1 S1 . . 2.321(11) ?
  Hg1 S1 . 2_656 2.321(11) ?
  Hg1 S5 . . 3.290(8) ?
  Hg1 S5 . 1_565 3.290(8) ?
  Hg1 S5 . 2_656 3.290(8) ?
  Hg1 S5 . 2_666 3.290(8) ?
  Tl1 S1 . 1_535 3.242(8) ?
  Tl1 S1 . 1_545 3.242(8) ?
  Tl1 S2 . 1_545 3.158(10) ?
  Tl1 S2 . . 3.158(10) ?
  Tl1 S5 . 2_646 3.363(12) ?
  Tl1 S6 . 2_646 3.119(9) ?
  Tl1 S6 . 2_656 3.119(9) ?
  Tl1 S8 . . 3.096(10) ?
  Tl2 S7 . 1_545 3.129(11) ?
  Tl2 S7 . . 3.129(11) ?
  Tl2 S8 . 5_445 3.470(9) ?
  Tl2 S8 . 5_455 3.470(9) ?
  Tl2 S10 . . 3.344(13) ?
  Tl2 S10 . 1_565 3.344(13) ?
  Tl2 S12 . . 3.075(15) ?
  Sb1 S4 . . 3.226(11) ?
  Sb1 S4 . 6_546 2.940(8) ?
  Sb1 S4 . 6_556 2.940(8) ?
  Sb1 S5 . 1_545 2.594(7) ?
  Sb1 S5 . . 2.594(7) ?
  Sb1 S6 . . 2.427(11) ?
  Sb2 S3 . 1_545 2.655(8) ?
  Sb2 S3 . . 2.655(8) ?
  Sb2 S4 . . 2.459(11) ?
  Sb2 S6 . 6_546 2.981(8) ?
  Sb2 S6 . 6_556 2.981(8) ?
  Sb3 Sb3' . . 0 ?
  Sb3 S10 . . 2.679(13) ?
  Sb3 S11 . . 2.896(14) ?
  Sb3 S11 . 1_565 2.896(14) ?
  Sb3 S12 . 1_545 3.070(16) ?
  Sb3 S12 . . 3.070(16) ?
  Sb3' S10 . . 2.679(13) ?
  Sb3' S11 . . 2.896(14) ?
  Sb3' S11 . 1_565 2.896(14) ?
  Sb3' S12 . 1_545 3.070(16) ?
  Sb3' S12 . . 3.070(16) ?
  Sb4 Sb4' . . 0 ?
  Sb4 S7 . . 2.373(10) ?
  Sb4 S9 . 1_545 2.781(10) ?
  Sb4 S9 . . 2.781(10) ?
  Sb4 S12 . . 2.786(15) ?
  Sb4 S12 . 1_565 2.786(15) ?
  Sb4' S7 . . 2.373(10) ?
  Sb4' S9 . 1_545 2.781(10) ?
  Sb4' S9 . . 2.781(10) ?
  Sb4' S12 . . 2.786(15) ?
  Sb4' S12 . 1_565 2.786(15) ?
  Sb5 Sb5' . . 0 ?
  Sb5 Sb6 . 5_565 3.542(6) ?
  Sb5 Sb6' . 5_565 3.542(6) ?
  Sb5 S2 . . 2.347(10) ?
  Sb5 S8 . . 2.570(9) ?
  Sb5 S8 . 1_565 2.570(9) ?
  Sb5 S9 . 1_545 3.051(11) ?
  Sb5 S9 . . 3.051(11) ?
  Sb5' Sb6 . 5_565 3.542(6) ?
  Sb5' Sb6' . 5_565 3.542(6) ?
  Sb5' S2 . . 2.347(10) ?
  Sb5' S8 . . 2.570(9) ?
  Sb5' S8 . 1_565 2.570(9) ?
  Sb5' S9 . 1_545 3.051(11) ?
  Sb5' S9 . . 3.051(11) ?
  Sb6 Sb6' . . 0 ?
  Sb6 S9 . 5_425 3.453(9) ?
  Sb6 S9 . 5_435 3.453(9) ?
  Sb6 S10 . 1_545 2.745(12) ?
  Sb6 S10 . . 2.745(12) ?
  Sb6 S11 . . 2.733(13) ?
  Sb6 S11 . 6_547 3.100(14) ?
  Sb6 S11 . 6_557 3.100(14) ?
  Sb6' S9 . 5_425 3.453(9) ?
  Sb6' S9 . 5_435 3.453(9) ?
  Sb6' S10 . 1_545 2.745(12) ?
  Sb6' S10 . . 2.745(12) ?
  Sb6' S11 . . 2.733(13) ?
  Sb6' S11 . 6_547 3.100(14) ?
  Sb6' S11 . 6_557 3.100(14) ?
  Mn1 S1 . 1_545 2.537(8) ?
  Mn1 S1 . . 2.537(8) ?
  Mn1 S3 . . 2.598(12) ?
  Mn1 S4 . . 2.728(9) ?
  Mn1 S4 . 1_565 2.728(9) ?
  Mn1 S5 . . 2.645(11) ?
  Mn2 S2 . . 2.633(10) ?
  Mn2 S2 . 1_565 2.633(10) ?
  Mn2 S3 . . 2.536(10) ?
  Mn2 S7 . . 2.636(10) ?
  Mn2 S7 . 1_565 2.636(10) ?
  Mn2 S9 . . 2.565(11) ?
  S1 S4 . 1_565 3.573(16) ?
  S2 S7 . . 3.589(18) ?
  S2 S8 . . 3.586(14) ?
  S2 S8 . 1_565 3.586(14) ?
  S3 S4 . . 3.454(11) ?
  S3 S4 . 1_565 3.454(11) ?
  S4 S6 . 6_546 3.564(15) ?
  S4 S6 . 6_556 3.564(15) ?
  S6 S8 . 2_656 3.566(14) ?
  S6 S8 . 2_666 3.566(14) ?
  S7 S9 . 1_545 3.586(14) ?
  S7 S9 . . 3.586(14) ?
  S10 S11 . . 3.593(16) ?
  S10 S11 . 1_565 3.593(16) ?

loop_
 _geom_angle_atom_site_label_1
 _geom_angle_atom_site_label_2
 _geom_angle_atom_site_label_3
 _geom_angle_site_symmetry_1
 _geom_angle_site_symmetry_2
 _geom_angle_site_symmetry_3
 _geom_angle
 _geom_angle_publ_flag
  S1 Hg1 S1 . . 2_656 180.0(5) ?
  S1 Hg1 S5 . . . 84.2(3) ?
  S1 Hg1 S5 . . 1_565 84.2(3) ?
  S1 Hg1 S5 . . 2_656 95.8(3) ?
  S1 Hg1 S5 . . 2_666 95.8(3) ?
  S1 Hg1 S5 2_656 . . 95.8(3) ?
  S1 Hg1 S5 2_656 . 1_565 95.8(3) ?
  S1 Hg1 S5 2_656 . 2_656 84.2(3) ?
  S1 Hg1 S5 2_656 . 2_666 84.2(3) ?
  S5 Hg1 S5 . . 1_565 71.79(15) ?
  S5 Hg1 S5 . . 2_656 108.21(15) ?
  S5 Hg1 S5 . . 2_666 180.0(5) ?
  S5 Hg1 S5 1_565 . 2_656 180.0(5) ?
  S5 Hg1 S5 1_565 . 2_666 108.21(15) ?
  S5 Hg1 S5 2_656 . 2_666 71.79(15) ?
  S1 Tl1 S1 1_535 . 1_545 73.01(14) ?
  S1 Tl1 S2 1_535 . 1_545 69.6(2) ?
  S1 Tl1 S2 1_535 . . 112.3(3) ?
  S1 Tl1 S5 1_535 . 2_646 79.3(3) ?
  S1 Tl1 S6 1_535 . 2_646 96.67(19) ?
  S1 Tl1 S6 1_535 . 2_656 148.4(3) ?
  S1 Tl1 S8 1_535 . . 137.13(19) ?
  S1 Tl1 S2 1_545 . 1_545 112.3(3) ?
  S1 Tl1 S2 1_545 . . 69.6(2) ?
  S1 Tl1 S5 1_545 . 2_646 79.3(3) ?
  S1 Tl1 S6 1_545 . 2_646 148.4(3) ?
  S1 Tl1 S6 1_545 . 2_656 96.67(19) ?
  S1 Tl1 S8 1_545 . . 137.13(19) ?
  S2 Tl1 S2 1_545 . . 75.30(19) ?
  S2 Tl1 S5 1_545 . 2_646 140.75(14) ?
  S2 Tl1 S6 1_545 . 2_646 90.6(2) ?
  S2 Tl1 S6 1_545 . 2_656 140.0(2) ?
  S2 Tl1 S8 1_545 . . 70.0(3) ?
  S2 Tl1 S5 . . 2_646 140.75(14) ?
  S2 Tl1 S6 . . 2_646 140.0(2) ?
  S2 Tl1 S6 . . 2_656 90.6(2) ?
  S2 Tl1 S8 . . . 70.0(3) ?
  S5 Tl1 S6 2_646 . 2_646 69.4(2) ?
  S5 Tl1 S6 2_646 . 2_656 69.4(2) ?
  S5 Tl1 S8 2_646 . . 127.6(3) ?
  S6 Tl1 S6 2_646 . 2_656 76.40(19) ?
  S6 Tl1 S8 2_646 . . 70.0(3) ?
  S6 Tl1 S8 2_656 . . 70.0(3) ?
  S7 Tl2 S7 1_545 . . 76.1(2) ?
  S7 Tl2 S8 1_545 . 5_445 95.4(2) ?
  S7 Tl2 S8 1_545 . 5_455 141.2(3) ?
  S7 Tl2 S10 1_545 . . 97.7(3) ?
  S7 Tl2 S10 1_545 . 1_565 147.6(3) ?
  S7 Tl2 S12 1_545 . . 73.4(3) ?
  S7 Tl2 S8 . . 5_445 141.2(3) ?
  S7 Tl2 S8 . . 5_455 95.4(2) ?
  S7 Tl2 S10 . . . 147.6(3) ?
  S7 Tl2 S10 . . 1_565 97.7(3) ?
  S7 Tl2 S12 . . . 73.4(3) ?
  S8 Tl2 S8 5_445 . 5_455 67.54(14) ?
  S8 Tl2 S10 5_445 . . 70.3(3) ?
  S8 Tl2 S10 5_445 . 1_565 107.7(3) ?
  S8 Tl2 S12 5_445 . . 141.1(2) ?
  S8 Tl2 S10 5_455 . . 107.7(3) ?
  S8 Tl2 S10 5_455 . 1_565 70.3(3) ?
  S8 Tl2 S12 5_455 . . 141.1(2) ?
  S10 Tl2 S10 . . 1_565 70.4(2) ?
  S10 Tl2 S12 . . . 74.4(4) ?
  S10 Tl2 S12 1_565 . . 74.4(4) ?
  S4 Sb1 S4 . . 6_546 104.2(3) ?
  S4 Sb1 S4 . . 6_556 104.2(3) ?
  S4 Sb1 S5 . . 1_545 79.2(3) ?
  S4 Sb1 S5 . . . 79.2(3) ?
  S4 Sb1 S6 . . . 170.8(3) ?
  S4 Sb1 S4 6_546 . 6_556 81.99(19) ?
  S4 Sb1 S5 6_546 . 1_545 90.9(2) ?
  S4 Sb1 S5 6_546 . . 172.7(2) ?
  S4 Sb1 S6 6_546 . . 82.6(3) ?
  S4 Sb1 S5 6_556 . 1_545 172.7(2) ?
  S4 Sb1 S5 6_556 . . 90.9(2) ?
  S4 Sb1 S6 6_556 . . 82.6(3) ?
  S5 Sb1 S5 1_545 . . 96.1(2) ?
  S5 Sb1 S6 1_545 . . 94.7(3) ?
  S5 Sb1 S6 . . . 94.7(3) ?
  S3 Sb2 S3 1_545 . . 93.2(3) ?
  S3 Sb2 S4 1_545 . . 84.9(3) ?
  S3 Sb2 S6 1_545 . 6_546 91.4(2) ?
  S3 Sb2 S6 1_545 . 6_556 164.9(3) ?
  S3 Sb2 S4 . . . 84.9(3) ?
  S3 Sb2 S6 . . 6_546 164.9(3) ?
  S3 Sb2 S6 . . 6_556 91.4(2) ?
  S4 Sb2 S6 . . 6_546 81.2(3) ?
  S4 Sb2 S6 . . 6_556 81.2(3) ?
  S6 Sb2 S6 6_546 . 6_556 80.6(2) ?
  Sb3' Sb3 S10 . . . 0 ?
  Sb3' Sb3 S11 . . . 0 ?
  Sb3' Sb3 S11 . . 1_565 0 ?
  Sb3' Sb3 S12 . . 1_545 0 ?
  Sb3' Sb3 S12 . . . 0 ?
  S10 Sb3 S11 . . . 80.1(4) ?
  S10 Sb3 S11 . . 1_565 80.1(4) ?
  S10 Sb3 S12 . . 1_545 84.7(4) ?
  S10 Sb3 S12 . . . 84.7(4) ?
  S11 Sb3 S11 . . 1_565 83.5(4) ?
  S11 Sb3 S12 . . 1_545 97.3(3) ?
  S11 Sb3 S12 . . . 164.5(4) ?
  S11 Sb3 S12 1_565 . 1_545 164.5(4) ?
  S11 Sb3 S12 1_565 . . 97.3(3) ?
  S12 Sb3 S12 1_545 . . 77.8(4) ?
  Sb3 Sb3' S10 . . . 0 ?
  Sb3 Sb3' S11 . . . 0 ?
  Sb3 Sb3' S11 . . 1_565 0 ?
  Sb3 Sb3' S12 . . 1_545 0 ?
  Sb3 Sb3' S12 . . . 0 ?
  S10 Sb3' S11 . . . 80.1(4) ?
  S10 Sb3' S11 . . 1_565 80.1(4) ?
  S10 Sb3' S12 . . 1_545 84.7(4) ?
  S10 Sb3' S12 . . . 84.7(4) ?
  S11 Sb3' S11 . . 1_565 83.5(4) ?
  S11 Sb3' S12 . . 1_545 97.3(3) ?
  S11 Sb3' S12 . . . 164.5(4) ?
  S11 Sb3' S12 1_565 . 1_545 164.5(4) ?
  S11 Sb3' S12 1_565 . . 97.3(3) ?
  S12 Sb3' S12 1_545 . . 77.8(4) ?
  Sb4' Sb4 S7 . . . 0 ?
  Sb4' Sb4 S9 . . 1_545 0 ?
  Sb4' Sb4 S9 . . . 0 ?
  Sb4' Sb4 S12 . . . 0 ?
  Sb4' Sb4 S12 . . 1_565 0 ?
  S7 Sb4 S9 . . 1_545 87.8(3) ?
  S7 Sb4 S9 . . . 87.8(3) ?
  S7 Sb4 S12 . . . 91.6(4) ?
  S7 Sb4 S12 . . 1_565 91.6(4) ?
  S9 Sb4 S9 1_545 . . 87.8(3) ?
  S9 Sb4 S12 1_545 . . 92.3(4) ?
  S9 Sb4 S12 1_545 . 1_565 179.4(4) ?
  S9 Sb4 S12 . . . 179.4(4) ?
  S9 Sb4 S12 . . 1_565 92.3(4) ?
  S12 Sb4 S12 . . 1_565 87.6(4) ?
  Sb4 Sb4' S7 . . . 0 ?
  Sb4 Sb4' S9 . . 1_545 0 ?
  Sb4 Sb4' S9 . . . 0 ?
  Sb4 Sb4' S12 . . . 0 ?
  Sb4 Sb4' S12 . . 1_565 0 ?
  S7 Sb4' S9 . . 1_545 87.8(3) ?
  S7 Sb4' S9 . . . 87.8(3) ?
  S7 Sb4' S12 . . . 91.6(4) ?
  S7 Sb4' S12 . . 1_565 91.6(4) ?
  S9 Sb4' S9 1_545 . . 87.8(3) ?
  S9 Sb4' S12 1_545 . . 92.3(4) ?
  S9 Sb4' S12 1_545 . 1_565 179.4(4) ?
  S9 Sb4' S12 . . . 179.4(4) ?
  S9 Sb4' S12 . . 1_565 92.3(4) ?
  S12 Sb4' S12 . . 1_565 87.6(4) ?
  Sb5' Sb5 Sb6 . . 5_565 0 ?
  Sb5' Sb5 Sb6' . . 5_565 0 ?
  Sb5' Sb5 S2 . . . 0 ?
  Sb5' Sb5 S8 . . . 0 ?
  Sb5' Sb5 S8 . . 1_565 0 ?
  Sb5' Sb5 S9 . . 1_545 0 ?
  Sb5' Sb5 S9 . . . 0 ?
  Sb6 Sb5 Sb6' 5_565 . 5_565 0.0(5) ?
  Sb6 Sb5 S2 5_565 . . 138.1(3) ?
  Sb6 Sb5 S8 5_565 . . 113.2(2) ?
  Sb6 Sb5 S8 5_565 . 1_565 113.2(2) ?
  Sb6 Sb5 S9 5_565 . 1_545 62.66(19) ?
  Sb6 Sb5 S9 5_565 . . 62.66(19) ?
  Sb6' Sb5 S2 5_565 . . 138.1(3) ?
  Sb6' Sb5 S8 5_565 . . 113.2(2) ?
  Sb6' Sb5 S8 5_565 . 1_565 113.2(2) ?
  Sb6' Sb5 S9 5_565 . 1_545 62.66(19) ?
  Sb6' Sb5 S9 5_565 . . 62.66(19) ?
  S2 Sb5 S8 . . . 93.5(3) ?
  S2 Sb5 S8 . . 1_565 93.5(3) ?
  S2 Sb5 S9 . . 1_545 85.7(3) ?
  S2 Sb5 S9 . . . 85.7(3) ?
  S8 Sb5 S8 . . 1_565 97.3(3) ?
  S8 Sb5 S9 . . 1_545 92.1(3) ?
  S8 Sb5 S9 . . . 170.6(3) ?
  S8 Sb5 S9 1_565 . 1_545 170.6(3) ?
  S8 Sb5 S9 1_565 . . 92.1(3) ?
  S9 Sb5 S9 1_545 . . 78.4(2) ?
  Sb5 Sb5' Sb6 . . 5_565 0 ?
  Sb5 Sb5' Sb6' . . 5_565 0 ?
  Sb5 Sb5' S2 . . . 0 ?
  Sb5 Sb5' S8 . . . 0 ?
  Sb5 Sb5' S8 . . 1_565 0 ?
  Sb5 Sb5' S9 . . 1_545 0 ?
  Sb5 Sb5' S9 . . . 0 ?
  Sb6 Sb5' Sb6' 5_565 . 5_565 0.0(5) ?
  Sb6 Sb5' S2 5_565 . . 138.1(3) ?
  Sb6 Sb5' S8 5_565 . . 113.2(2) ?
  Sb6 Sb5' S8 5_565 . 1_565 113.2(2) ?
  Sb6 Sb5' S9 5_565 . 1_545 62.66(19) ?
  Sb6 Sb5' S9 5_565 . . 62.66(19) ?
  Sb6' Sb5' S2 5_565 . . 138.1(3) ?
  Sb6' Sb5' S8 5_565 . . 113.2(2) ?
  Sb6' Sb5' S8 5_565 . 1_565 113.2(2) ?
  Sb6' Sb5' S9 5_565 . 1_545 62.66(19) ?
  Sb6' Sb5' S9 5_565 . . 62.66(19) ?
  S2 Sb5' S8 . . . 93.5(3) ?
  S2 Sb5' S8 . . 1_565 93.5(3) ?
  S2 Sb5' S9 . . 1_545 85.7(3) ?
  S2 Sb5' S9 . . . 85.7(3) ?
  S8 Sb5' S8 . . 1_565 97.3(3) ?
  S8 Sb5' S9 . . 1_545 92.1(3) ?
  S8 Sb5' S9 . . . 170.6(3) ?
  S8 Sb5' S9 1_565 . 1_545 170.6(3) ?
  S8 Sb5' S9 1_565 . . 92.1(3) ?
  S9 Sb5' S9 1_545 . . 78.4(2) ?
  Sb5 Sb6 Sb5' 5_435 . 5_435 0.0(5) ?
  Sb5 Sb6 Sb6' 5_435 . . 0 ?
  Sb5 Sb6 S9 5_435 . 5_425 51.7(2) ?
  Sb5 Sb6 S9 5_435 . 5_435 51.7(2) ?
  Sb5 Sb6 S10 5_435 . 1_545 76.2(3) ?
  Sb5 Sb6 S10 5_435 . . 76.2(3) ?
  Sb5 Sb6 S11 5_435 . . 149.1(4) ?
  Sb5 Sb6 S11 5_435 . 6_547 120.7(2) ?
  Sb5 Sb6 S11 5_435 . 6_557 120.7(2) ?
  Sb5' Sb6 Sb6' 5_435 . . 0 ?
  Sb5' Sb6 S9 5_435 . 5_425 51.7(2) ?
  Sb5' Sb6 S9 5_435 . 5_435 51.7(2) ?
  Sb5' Sb6 S10 5_435 . 1_545 76.2(3) ?
  Sb5' Sb6 S10 5_435 . . 76.2(3) ?
  Sb5' Sb6 S11 5_435 . . 149.1(4) ?
  Sb5' Sb6 S11 5_435 . 6_547 120.7(2) ?
  Sb5' Sb6 S11 5_435 . 6_557 120.7(2) ?
  Sb6' Sb6 S9 . . 5_425 0 ?
  Sb6' Sb6 S9 . . 5_435 0 ?
  Sb6' Sb6 S10 . . 1_545 0 ?
  Sb6' Sb6 S10 . . . 0 ?
  Sb6' Sb6 S11 . . . 0 ?
  Sb6' Sb6 S11 . . 6_547 0 ?
  Sb6' Sb6 S11 . . 6_557 0 ?
  S9 Sb6 S9 5_425 . 5_435 67.92(15) ?
  S9 Sb6 S10 5_425 . 1_545 80.2(3) ?
  S9 Sb6 S10 5_425 . . 127.9(4) ?
  S9 Sb6 S11 5_425 . . 144.58(16) ?
  S9 Sb6 S11 5_425 . 6_547 69.1(3) ?
  S9 Sb6 S11 5_425 . 6_557 109.7(4) ?
  S9 Sb6 S10 5_435 . 1_545 127.9(4) ?
  S9 Sb6 S10 5_435 . . 80.2(3) ?
  S9 Sb6 S11 5_435 . . 144.58(16) ?
  S9 Sb6 S11 5_435 . 6_547 109.7(4) ?
  S9 Sb6 S11 5_435 . 6_557 69.1(3) ?
  S10 Sb6 S10 1_545 . . 89.3(4) ?
  S10 Sb6 S11 1_545 . . 82.0(4) ?
  S10 Sb6 S11 1_545 . 6_547 94.7(3) ?
  S10 Sb6 S11 1_545 . 6_557 163.1(4) ?
  S10 Sb6 S11 . . . 82.0(4) ?
  S10 Sb6 S11 . . 6_547 163.1(4) ?
  S10 Sb6 S11 . . 6_557 94.7(3) ?
  S11 Sb6 S11 . . 6_547 82.3(4) ?
  S11 Sb6 S11 . . 6_557 82.3(4) ?
  S11 Sb6 S11 6_547 . 6_557 77.0(3) ?
  Sb5 Sb6' Sb5' 5_435 . 5_435 0.0(5) ?
  Sb5 Sb6' Sb6 5_435 . . 0 ?
  Sb5 Sb6' S9 5_435 . 5_425 51.7(2) ?
  Sb5 Sb6' S9 5_435 . 5_435 51.7(2) ?
  Sb5 Sb6' S10 5_435 . 1_545 76.2(3) ?
  Sb5 Sb6' S10 5_435 . . 76.2(3) ?
  Sb5 Sb6' S11 5_435 . . 149.1(4) ?
  Sb5 Sb6' S11 5_435 . 6_547 120.7(2) ?
  Sb5 Sb6' S11 5_435 . 6_557 120.7(2) ?
  Sb5' Sb6' Sb6 5_435 . . 0 ?
  Sb5' Sb6' S9 5_435 . 5_425 51.7(2) ?
  Sb5' Sb6' S9 5_435 . 5_435 51.7(2) ?
  Sb5' Sb6' S10 5_435 . 1_545 76.2(3) ?
  Sb5' Sb6' S10 5_435 . . 76.2(3) ?
  Sb5' Sb6' S11 5_435 . . 149.1(4) ?
  Sb5' Sb6' S11 5_435 . 6_547 120.7(2) ?
  Sb5' Sb6' S11 5_435 . 6_557 120.7(2) ?
  Sb6 Sb6' S9 . . 5_425 0 ?
  Sb6 Sb6' S9 . . 5_435 0 ?
  Sb6 Sb6' S10 . . 1_545 0 ?
  Sb6 Sb6' S10 . . . 0 ?
  Sb6 Sb6' S11 . . . 0 ?
  Sb6 Sb6' S11 . . 6_547 0 ?
  Sb6 Sb6' S11 . . 6_557 0 ?
  S9 Sb6' S9 5_425 . 5_435 67.92(15) ?
  S9 Sb6' S10 5_425 . 1_545 80.2(3) ?
  S9 Sb6' S10 5_425 . . 127.9(4) ?
  S9 Sb6' S11 5_425 . . 144.58(16) ?
  S9 Sb6' S11 5_425 . 6_547 69.1(3) ?
  S9 Sb6' S11 5_425 . 6_557 109.7(4) ?
  S9 Sb6' S10 5_435 . 1_545 127.9(4) ?
  S9 Sb6' S10 5_435 . . 80.2(3) ?
  S9 Sb6' S11 5_435 . . 144.58(16) ?
  S9 Sb6' S11 5_435 . 6_547 109.7(4) ?
  S9 Sb6' S11 5_435 . 6_557 69.1(3) ?
  S10 Sb6' S10 1_545 . . 89.3(4) ?
  S10 Sb6' S11 1_545 . . 82.0(4) ?
  S10 Sb6' S11 1_545 . 6_547 94.7(3) ?
  S10 Sb6' S11 1_545 . 6_557 163.1(4) ?
  S10 Sb6' S11 . . . 82.0(4) ?
  S10 Sb6' S11 . . 6_547 163.1(4) ?
  S10 Sb6' S11 . . 6_557 94.7(3) ?
  S11 Sb6' S11 . . 6_547 82.3(4) ?
  S11 Sb6' S11 . . 6_557 82.3(4) ?
  S11 Sb6' S11 6_547 . 6_557 77.0(3) ?
  S1 Mn1 S1 1_545 . . 99.0(3) ?
  S1 Mn1 S3 1_545 . . 94.9(3) ?
  S1 Mn1 S4 1_545 . . 85.4(3) ?
  S1 Mn1 S4 1_545 . 1_565 174.1(4) ?
  S1 Mn1 S5 1_545 . . 95.2(3) ?
  S1 Mn1 S3 . . . 94.9(3) ?
  S1 Mn1 S4 . . . 174.1(4) ?
  S1 Mn1 S4 . . 1_565 85.4(3) ?
  S1 Mn1 S5 . . . 95.2(3) ?
  S3 Mn1 S4 . . . 80.8(3) ?
  S3 Mn1 S4 . . 1_565 80.8(3) ?
  S3 Mn1 S5 . . . 164.4(4) ?
  S4 Mn1 S4 . . 1_565 90.0(3) ?
  S4 Mn1 S5 . . . 88.2(3) ?
  S4 Mn1 S5 1_565 . . 88.2(3) ?
  S2 Mn2 S2 . . 1_565 94.2(4) ?
  S2 Mn2 S3 . . . 90.4(3) ?
  S2 Mn2 S7 . . . 85.9(3) ?
  S2 Mn2 S7 . . 1_565 178.1(4) ?
  S2 Mn2 S9 . . . 91.0(3) ?
  S2 Mn2 S3 1_565 . . 90.4(3) ?
  S2 Mn2 S7 1_565 . . 178.1(4) ?
  S2 Mn2 S7 1_565 . 1_565 85.9(3) ?
  S2 Mn2 S9 1_565 . . 91.0(3) ?
  S3 Mn2 S7 . . . 91.4(3) ?
  S3 Mn2 S7 . . 1_565 91.4(3) ?
  S3 Mn2 S9 . . . 177.9(5) ?
  S7 Mn2 S7 . . 1_565 94.0(4) ?
  S7 Mn2 S9 . . . 87.1(3) ?
  S7 Mn2 S9 1_565 . . 87.1(3) ?
  Hg1 S1 Tl1 . . 1_565 102.6(3) ?
  Hg1 S1 Tl1 . . 1_575 102.6(3) ?
  Hg1 S1 Mn1 . . . 100.0(3) ?
  Hg1 S1 Mn1 . . 1_565 100.0(3) ?
  Hg1 S1 S4 . . 1_565 108.4(3) ?
  Tl1 S1 Tl1 1_565 . 1_575 73.0(2) ?
  Tl1 S1 Mn1 1_565 . . 89.69(14) ?
  Tl1 S1 Mn1 1_565 . 1_565 154.1(4) ?
  Tl1 S1 S4 1_565 . 1_565 131.7(3) ?
  Tl1 S1 Mn1 1_575 . . 154.1(4) ?
  Tl1 S1 Mn1 1_575 . 1_565 89.69(14) ?
  Tl1 S1 S4 1_575 . 1_565 131.7(3) ?
  Mn1 S1 Mn1 . . 1_565 99.0(4) ?
  Mn1 S1 S4 . . 1_565 49.6(2) ?
  Mn1 S1 S4 1_565 . 1_565 49.6(2) ?
  Tl1 S2 Tl1 . . 1_565 75.3(3) ?
  Tl1 S2 Sb5 . . . 99.0(3) ?
  Tl1 S2 Sb5' . . . 99.0(3) ?
  Tl1 S2 Mn2 . . 1_545 92.69(13) ?
  Tl1 S2 Mn2 . . . 160.3(4) ?
  Tl1 S2 S7 . . . 137.2(2) ?
  Tl1 S2 S8 . . . 54.2(2) ?
  Tl1 S2 S8 . . 1_565 94.1(3) ?
  Tl1 S2 Sb5 1_565 . . 99.0(3) ?
  Tl1 S2 Sb5' 1_565 . . 99.0(3) ?
  Tl1 S2 Mn2 1_565 . 1_545 160.3(4) ?
  Tl1 S2 Mn2 1_565 . . 92.69(13) ?
  Tl1 S2 S7 1_565 . . 137.2(2) ?
  Tl1 S2 S8 1_565 . . 94.1(3) ?
  Tl1 S2 S8 1_565 . 1_565 54.2(2) ?
  Sb5 S2 Sb5' . . . 0.0(5) ?
  Sb5 S2 Mn2 . . 1_545 98.2(3) ?
  Sb5 S2 Mn2 . . . 98.2(3) ?
  Sb5 S2 S7 . . . 100.7(4) ?
  Sb5 S2 S8 . . . 45.7(2) ?
  Sb5 S2 S8 . . 1_565 45.7(2) ?
  Sb5' S2 Mn2 . . 1_545 98.2(3) ?
  Sb5' S2 Mn2 . . . 98.2(3) ?
  Sb5' S2 S7 . . . 100.7(4) ?
  Sb5' S2 S8 . . . 45.7(2) ?
  Sb5' S2 S8 . . 1_565 45.7(2) ?
  Mn2 S2 Mn2 1_545 . . 94.2(4) ?
  Mn2 S2 S7 1_545 . . 47.1(2) ?
  Mn2 S2 S8 1_545 . . 91.1(2) ?
  Mn2 S2 S8 1_545 . 1_565 143.8(4) ?
  Mn2 S2 S7 . . . 47.1(2) ?
  Mn2 S2 S8 . . . 143.8(4) ?
  Mn2 S2 S8 . . 1_565 91.1(2) ?
  S7 S2 S8 . . . 126.4(3) ?
  S7 S2 S8 . . 1_565 126.4(3) ?
  S8 S2 S8 . . 1_565 65.1(2) ?
  Sb2 S3 Sb2 . . 1_565 93.2(4) ?
  Sb2 S3 Mn1 . . . 96.4(3) ?
  Sb2 S3 Mn2 . . . 113.6(3) ?
  Sb2 S3 S4 . . . 45.2(2) ?
  Sb2 S3 S4 . . 1_565 96.1(3) ?
  Sb2 S3 Mn1 1_565 . . 96.4(3) ?
  Sb2 S3 Mn2 1_565 . . 113.6(3) ?
  Sb2 S3 S4 1_565 . . 96.1(3) ?
  Sb2 S3 S4 1_565 . 1_565 45.2(2) ?
  Mn1 S3 Mn2 . . . 135.1(5) ?
  Mn1 S3 S4 . . . 51.2(3) ?
  Mn1 S3 S4 . . 1_565 51.2(3) ?
  Mn2 S3 S4 . . . 145.85(13) ?
  Mn2 S3 S4 . . 1_565 145.85(13) ?
  S4 S3 S4 . . 1_565 67.9(2) ?
  Sb1 S4 Sb1 . . 6_546 75.8(2) ?
  Sb1 S4 Sb1 . . 6_556 75.8(2) ?
  Sb1 S4 Sb2 . . . 172.0(5) ?
  Sb1 S4 Mn1 . . 1_545 87.8(3) ?
  Sb1 S4 Mn1 . . . 87.8(3) ?
  Sb1 S4 S1 . . 1_545 89.4(3) ?
  Sb1 S4 S3 . . 1_545 135.3(3) ?
  Sb1 S4 S3 . . . 135.3(3) ?
  Sb1 S4 S6 . . 6_546 118.0(3) ?
  Sb1 S4 S6 . . 6_556 118.0(3) ?
  Sb1 S4 Sb1 6_546 . 6_556 82.0(3) ?
  Sb1 S4 Sb2 6_546 . . 98.2(3) ?
  Sb1 S4 Mn1 6_546 . 1_545 91.75(11) ?
  Sb1 S4 Mn1 6_546 . . 163.4(4) ?
  Sb1 S4 S1 6_546 . 1_545 135.3(2) ?
  Sb1 S4 S3 6_546 . 1_545 96.52(18) ?
  Sb1 S4 S3 6_546 . . 147.8(5) ?
  Sb1 S4 S6 6_546 . 6_546 42.5(2) ?
  Sb1 S4 S6 6_546 . 6_556 88.4(3) ?
  Sb1 S4 Sb2 6_556 . . 98.2(3) ?
  Sb1 S4 Mn1 6_556 . 1_545 163.4(4) ?
  Sb1 S4 Mn1 6_556 . . 91.75(11) ?
  Sb1 S4 S1 6_556 . 1_545 135.3(2) ?
  Sb1 S4 S3 6_556 . 1_545 147.8(5) ?
  Sb1 S4 S3 6_556 . . 96.52(18) ?
  Sb1 S4 S6 6_556 . 6_546 88.4(3) ?
  Sb1 S4 S6 6_556 . 6_556 42.5(2) ?
  Sb2 S4 Mn1 . . 1_545 97.9(3) ?
  Sb2 S4 Mn1 . . . 97.9(3) ?
  Sb2 S4 S1 . . 1_545 98.7(3) ?
  Sb2 S4 S3 . . 1_545 50.0(2) ?
  Sb2 S4 S3 . . . 50.0(2) ?
  Sb2 S4 S6 . . 6_546 55.8(3) ?
  Sb2 S4 S6 . . 6_556 55.8(3) ?
  Mn1 S4 Mn1 1_545 . . 90.0(4) ?
  Mn1 S4 S1 1_545 . 1_545 45.05(19) ?
  Mn1 S4 S3 1_545 . 1_545 48.0(2) ?
  Mn1 S4 S3 1_545 . . 96.9(3) ?
  Mn1 S4 S6 1_545 . 6_546 97.4(2) ?
  Mn1 S4 S6 1_545 . 6_556 153.3(4) ?
  Mn1 S4 S1 . . 1_545 45.05(19) ?
  Mn1 S4 S3 . . 1_545 96.9(3) ?
  Mn1 S4 S3 . . . 48.0(2) ?
  Mn1 S4 S6 . . 6_546 153.3(4) ?
  Mn1 S4 S6 . . 6_556 97.4(2) ?
  S1 S4 S3 1_545 . 1_545 65.1(3) ?
  S1 S4 S3 1_545 . . 65.1(3) ?
  S1 S4 S6 1_545 . 6_546 134.6(3) ?
  S1 S4 S6 1_545 . 6_556 134.6(3) ?
  S3 S4 S3 1_545 . . 67.9(2) ?
  S3 S4 S6 1_545 . 6_546 70.3(3) ?
  S3 S4 S6 1_545 . 6_556 105.5(4) ?
  S3 S4 S6 . . 6_546 105.5(4) ?
  S3 S4 S6 . . 6_556 70.3(3) ?
  S6 S4 S6 6_546 . 6_556 65.5(3) ?
  Hg1 S5 Hg1 1_545 . . 71.8(2) ?
  Hg1 S5 Tl1 1_545 . 2_666 82.3(3) ?
  Hg1 S5 Sb1 1_545 . . 95.91(8) ?
  Hg1 S5 Sb1 1_545 . 1_565 167.2(3) ?
  Hg1 S5 Mn1 1_545 . . 76.8(2) ?
  Hg1 S5 Tl1 . . 2_666 82.3(3) ?
  Hg1 S5 Sb1 . . . 167.2(3) ?
  Hg1 S5 Sb1 . . 1_565 95.91(8) ?
  Hg1 S5 Mn1 . . . 76.8(2) ?
  Tl1 S5 Sb1 2_666 . . 92.6(3) ?
  Tl1 S5 Sb1 2_666 . 1_565 92.6(3) ?
  Tl1 S5 Mn1 2_666 . . 154.2(4) ?
  Sb1 S5 Sb1 . . 1_565 96.1(3) ?
  Sb1 S5 Mn1 . . . 104.5(3) ?
  Sb1 S5 Mn1 1_565 . . 104.5(3) ?
  Tl1 S6 Tl1 2_656 . 2_666 76.4(3) ?
  Tl1 S6 Sb1 2_656 . . 102.2(3) ?
  Tl1 S6 Sb2 2_656 . 6_546 97.95(11) ?
  Tl1 S6 Sb2 2_656 . 6_556 159.8(4) ?
  Tl1 S6 S4 2_656 . 6_546 104.56(15) ?
  Tl1 S6 S4 2_656 . 6_556 157.0(4) ?
  Tl1 S6 S8 2_656 . 2_656 54.7(2) ?
  Tl1 S6 S8 2_656 . 2_666 95.2(4) ?
  Tl1 S6 Sb1 2_666 . . 102.2(3) ?
  Tl1 S6 Sb2 2_666 . 6_546 159.8(4) ?
  Tl1 S6 Sb2 2_666 . 6_556 97.95(11) ?
  Tl1 S6 S4 2_666 . 6_546 157.0(4) ?
  Tl1 S6 S4 2_666 . 6_556 104.56(15) ?
  Tl1 S6 S8 2_666 . 2_656 95.2(4) ?
  Tl1 S6 S8 2_666 . 2_666 54.7(2) ?
  Sb1 S6 Sb2 . . 6_546 97.9(3) ?
  Sb1 S6 Sb2 . . 6_556 97.9(3) ?
  Sb1 S6 S4 . . 6_546 54.9(3) ?
  Sb1 S6 S4 . . 6_556 54.9(3) ?
  Sb1 S6 S8 . . 2_656 146.76(14) ?
  Sb1 S6 S8 . . 2_666 146.76(14) ?
  Sb2 S6 Sb2 6_546 . 6_556 80.6(3) ?
  Sb2 S6 S4 6_546 . 6_546 43.0(2) ?
  Sb2 S6 S4 6_546 . 6_556 88.2(3) ?
  Sb2 S6 S8 6_546 . 2_656 66.5(2) ?
  Sb2 S6 S8 6_546 . 2_666 107.5(3) ?
  Sb2 S6 S4 6_556 . 6_546 88.2(3) ?
  Sb2 S6 S4 6_556 . 6_556 43.0(2) ?
  Sb2 S6 S8 6_556 . 2_656 107.5(3) ?
  Sb2 S6 S8 6_556 . 2_666 66.5(2) ?
  S4 S6 S4 6_546 . 6_556 65.5(3) ?
  S4 S6 S8 6_546 . 2_656 104.0(2) ?
  S4 S6 S8 6_546 . 2_666 145.9(4) ?
  S4 S6 S8 6_556 . 2_656 145.9(4) ?
  S4 S6 S8 6_556 . 2_666 104.0(2) ?
  S8 S6 S8 2_656 . 2_666 65.5(2) ?
  Tl2 S7 Tl2 . . 1_565 76.1(3) ?
  Tl2 S7 Sb4 . . . 101.1(3) ?
  Tl2 S7 Sb4' . . . 101.1(3) ?
  Tl2 S7 Mn2 . . 1_545 92.39(14) ?
  Tl2 S7 Mn2 . . . 160.7(4) ?
  Tl2 S7 S2 . . . 136.9(2) ?
  Tl2 S7 S9 . . 1_545 102.46(18) ?
  Tl2 S7 S9 . . . 151.5(4) ?
  Tl2 S7 Sb4 1_565 . . 101.1(3) ?
  Tl2 S7 Sb4' 1_565 . . 101.1(3) ?
  Tl2 S7 Mn2 1_565 . 1_545 160.7(4) ?
  Tl2 S7 Mn2 1_565 . . 92.39(14) ?
  Tl2 S7 S2 1_565 . . 136.9(2) ?
  Tl2 S7 S9 1_565 . 1_545 151.5(4) ?
  Tl2 S7 S9 1_565 . . 102.46(18) ?
  Sb4 S7 Sb4' . . . 0.0(5) ?
  Sb4 S7 Mn2 . . 1_545 96.3(4) ?
  Sb4 S7 Mn2 . . . 96.3(4) ?
  Sb4 S7 S2 . . . 97.9(4) ?
  Sb4 S7 S9 . . 1_545 50.8(3) ?
  Sb4 S7 S9 . . . 50.8(3) ?
  Sb4' S7 Mn2 . . 1_545 96.3(4) ?
  Sb4' S7 Mn2 . . . 96.3(4) ?
  Sb4' S7 S2 . . . 97.9(4) ?
  Sb4' S7 S9 . . 1_545 50.8(3) ?
  Sb4' S7 S9 . . . 50.8(3) ?
  Mn2 S7 Mn2 1_545 . . 94.0(5) ?
  Mn2 S7 S2 1_545 . . 47.0(2) ?
  Mn2 S7 S9 1_545 . 1_545 45.6(2) ?
  Mn2 S7 S9 1_545 . . 95.0(4) ?
  Mn2 S7 S2 . . . 47.0(2) ?
  Mn2 S7 S9 . . 1_545 95.0(4) ?
  Mn2 S7 S9 . . . 45.6(2) ?
  S2 S7 S9 . . 1_545 62.2(3) ?
  S2 S7 S9 . . . 62.2(3) ?
  S9 S7 S9 1_545 . . 65.1(2) ?
  Tl1 S8 Tl2 . . 5_545 139.8(2) ?
  Tl1 S8 Tl2 . . 5_555 139.8(2) ?
  Tl1 S8 Sb5 . . 1_545 95.8(3) ?
  Tl1 S8 Sb5 . . . 95.8(3) ?
  Tl1 S8 Sb5' . . 1_545 95.8(3) ?
  Tl1 S8 Sb5' . . . 95.8(3) ?
  Tl1 S8 S2 . . 1_545 55.8(2) ?
  Tl1 S8 S2 . . . 55.8(2) ?
  Tl1 S8 S6 . . 2_646 55.3(2) ?
  Tl1 S8 S6 . . 2_656 55.3(2) ?
  Tl2 S8 Tl2 5_545 . 5_555 67.5(2) ?
  Tl2 S8 Sb5 5_545 . 1_545 73.76(17) ?
  Tl2 S8 Sb5 5_545 . . 123.7(3) ?
  Tl2 S8 Sb5' 5_545 . 1_545 73.76(17) ?
  Tl2 S8 Sb5' 5_545 . . 123.7(3) ?
  Tl2 S8 S2 5_545 . 1_545 109.68(14) ?
  Tl2 S8 S2 5_545 . . 159.2(4) ?
  Tl2 S8 S6 5_545 . 2_646 86.0(2) ?
  Tl2 S8 S6 5_545 . 2_656 122.1(4) ?
  Tl2 S8 Sb5 5_555 . 1_545 123.7(3) ?
  Tl2 S8 Sb5 5_555 . . 73.76(17) ?
  Tl2 S8 Sb5' 5_555 . 1_545 123.7(3) ?
  Tl2 S8 Sb5' 5_555 . . 73.76(17) ?
  Tl2 S8 S2 5_555 . 1_545 159.2(4) ?
  Tl2 S8 S2 5_555 . . 109.68(14) ?
  Tl2 S8 S6 5_555 . 2_646 122.1(4) ?
  Tl2 S8 S6 5_555 . 2_656 86.0(2) ?
  Sb5 S8 Sb5 1_545 . . 97.3(5) ?
  Sb5 S8 Sb5' 1_545 . 1_545 0.0(5) ?
  Sb5 S8 Sb5' 1_545 . . 97.3(5) ?
  Sb5 S8 S2 1_545 . 1_545 40.8(2) ?
  Sb5 S8 S2 1_545 . . 92.9(4) ?
  Sb5 S8 S6 1_545 . 2_646 93.21(18) ?
  Sb5 S8 S6 1_545 . 2_656 150.2(4) ?
  Sb5 S8 Sb5' . . 1_545 97.3(5) ?
  Sb5 S8 Sb5' . . . 0.0(5) ?
  Sb5 S8 S2 . . 1_545 92.9(4) ?
  Sb5 S8 S2 . . . 40.8(2) ?
  Sb5 S8 S6 . . 2_646 150.2(4) ?
  Sb5 S8 S6 . . 2_656 93.21(18) ?
  Sb5' S8 Sb5' 1_545 . . 97.3(5) ?
  Sb5' S8 S2 1_545 . 1_545 40.8(2) ?
  Sb5' S8 S2 1_545 . . 92.9(4) ?
  Sb5' S8 S6 1_545 . 2_646 93.21(18) ?
  Sb5' S8 S6 1_545 . 2_656 150.2(4) ?
  Sb5' S8 S2 . . 1_545 92.9(4) ?
  Sb5' S8 S2 . . . 40.8(2) ?
  Sb5' S8 S6 . . 2_646 150.2(4) ?
  Sb5' S8 S6 . . 2_656 93.21(18) ?
  S2 S8 S2 1_545 . . 65.1(3) ?
  S2 S8 S6 1_545 . 2_646 77.2(3) ?
  S2 S8 S6 1_545 . 2_656 111.1(3) ?
  S2 S8 S6 . . 2_646 111.1(3) ?
  S2 S8 S6 . . 2_656 77.2(3) ?
  S6 S8 S6 2_646 . 2_656 65.5(2) ?
  Sb4 S9 Sb4 . . 1_565 87.8(4) ?
  Sb4 S9 Sb4' . . . 0.0(5) ?
  Sb4 S9 Sb4' . . 1_565 87.8(4) ?
  Sb4 S9 Sb5 . . . 96.37(9) ?
  Sb4 S9 Sb5 . . 1_565 171.2(4) ?
  Sb4 S9 Sb5' . . . 96.37(9) ?
  Sb4 S9 Sb5' . . 1_565 171.2(4) ?
  Sb4 S9 Sb6 . . 5_565 76.68(17) ?
  Sb4 S9 Sb6 . . 5_575 123.0(4) ?
  Sb4 S9 Sb6' . . 5_565 76.68(17) ?
  Sb4 S9 Sb6' . . 5_575 123.0(4) ?
  Sb4 S9 Mn2 . . . 88.6(3) ?
  Sb4 S9 S7 . . . 41.4(2) ?
  Sb4 S9 S7 . . 1_565 89.8(4) ?
  Sb4 S9 Sb4' 1_565 . . 87.8(4) ?
  Sb4 S9 Sb4' 1_565 . 1_565 0.0(5) ?
  Sb4 S9 Sb5 1_565 . . 171.2(4) ?
  Sb4 S9 Sb5 1_565 . 1_565 96.37(9) ?
  Sb4 S9 Sb5' 1_565 . . 171.2(4) ?
  Sb4 S9 Sb5' 1_565 . 1_565 96.37(9) ?
  Sb4 S9 Sb6 1_565 . 5_565 123.0(4) ?
  Sb4 S9 Sb6 1_565 . 5_575 76.68(17) ?
  Sb4 S9 Sb6' 1_565 . 5_565 123.0(4) ?
  Sb4 S9 Sb6' 1_565 . 5_575 76.68(17) ?
  Sb4 S9 Mn2 1_565 . . 88.6(3) ?
  Sb4 S9 S7 1_565 . . 89.8(4) ?
  Sb4 S9 S7 1_565 . 1_565 41.4(2) ?
  Sb4' S9 Sb4' . . 1_565 87.8(4) ?
  Sb4' S9 Sb5 . . . 96.37(9) ?
  Sb4' S9 Sb5 . . 1_565 171.2(4) ?
  Sb4' S9 Sb5' . . . 96.37(9) ?
  Sb4' S9 Sb5' . . 1_565 171.2(4) ?
  Sb4' S9 Sb6 . . 5_565 76.68(17) ?
  Sb4' S9 Sb6 . . 5_575 123.0(4) ?
  Sb4' S9 Sb6' . . 5_565 76.68(17) ?
  Sb4' S9 Sb6' . . 5_575 123.0(4) ?
  Sb4' S9 Mn2 . . . 88.6(3) ?
  Sb4' S9 S7 . . . 41.4(2) ?
  Sb4' S9 S7 . . 1_565 89.8(4) ?
  Sb4' S9 Sb5 1_565 . . 171.2(4) ?
  Sb4' S9 Sb5 1_565 . 1_565 96.37(9) ?
  Sb4' S9 Sb5' 1_565 . . 171.2(4) ?
  Sb4' S9 Sb5' 1_565 . 1_565 96.37(9) ?
  Sb4' S9 Sb6 1_565 . 5_565 123.0(4) ?
  Sb4' S9 Sb6 1_565 . 5_575 76.68(17) ?
  Sb4' S9 Sb6' 1_565 . 5_565 123.0(4) ?
  Sb4' S9 Sb6' 1_565 . 5_575 76.68(17) ?
  Sb4' S9 Mn2 1_565 . . 88.6(3) ?
  Sb4' S9 S7 1_565 . . 89.8(4) ?
  Sb4' S9 S7 1_565 . 1_565 41.4(2) ?
  Sb5 S9 Sb5 . . 1_565 78.4(3) ?
  Sb5 S9 Sb5' . . . 0.0(5) ?
  Sb5 S9 Sb5' . . 1_565 78.4(3) ?
  Sb5 S9 Sb6 . . 5_565 65.7(2) ?
  Sb5 S9 Sb6 . . 5_575 107.1(4) ?
  Sb5 S9 Sb6' . . 5_565 65.7(2) ?
  Sb5 S9 Sb6' . . 5_575 107.1(4) ?
  Sb5 S9 Mn2 . . . 83.8(3) ?
  Sb5 S9 S7 . . . 88.3(2) ?
  Sb5 S9 S7 . . 1_565 130.6(4) ?
  Sb5 S9 Sb5' 1_565 . . 78.4(3) ?
  Sb5 S9 Sb5' 1_565 . 1_565 0.0(5) ?
  Sb5 S9 Sb6 1_565 . 5_565 107.1(4) ?
  Sb5 S9 Sb6 1_565 . 5_575 65.7(2) ?
  Sb5 S9 Sb6' 1_565 . 5_565 107.1(4) ?
  Sb5 S9 Sb6' 1_565 . 5_575 65.7(2) ?
  Sb5 S9 Mn2 1_565 . . 83.8(3) ?
  Sb5 S9 S7 1_565 . . 130.6(4) ?
  Sb5 S9 S7 1_565 . 1_565 88.3(2) ?
  Sb5' S9 Sb5' . . 1_565 78.4(3) ?
  Sb5' S9 Sb6 . . 5_565 65.7(2) ?
  Sb5' S9 Sb6 . . 5_575 107.1(4) ?
  Sb5' S9 Sb6' . . 5_565 65.7(2) ?
  Sb5' S9 Sb6' . . 5_575 107.1(4) ?
  Sb5' S9 Mn2 . . . 83.8(3) ?
  Sb5' S9 S7 . . . 88.3(2) ?
  Sb5' S9 S7 . . 1_565 130.6(4) ?
  Sb5' S9 Sb6 1_565 . 5_565 107.1(4) ?
  Sb5' S9 Sb6 1_565 . 5_575 65.7(2) ?
  Sb5' S9 Sb6' 1_565 . 5_565 107.1(4) ?
  Sb5' S9 Sb6' 1_565 . 5_575 65.7(2) ?
  Sb5' S9 Mn2 1_565 . . 83.8(3) ?
  Sb5' S9 S7 1_565 . . 130.6(4) ?
  Sb5' S9 S7 1_565 . 1_565 88.3(2) ?
  Sb6 S9 Sb6 5_565 . 5_575 67.9(2) ?
  Sb6 S9 Sb6' 5_565 . 5_565 0.0(5) ?
  Sb6 S9 Sb6' 5_565 . 5_575 67.9(2) ?
  Sb6 S9 Mn2 5_565 . . 143.84(19) ?
  Sb6 S9 S7 5_565 . . 110.03(15) ?
  Sb6 S9 S7 5_565 . 1_565 160.6(5) ?
  Sb6 S9 Sb6' 5_575 . 5_565 67.9(2) ?
  Sb6 S9 Sb6' 5_575 . 5_575 0.0(5) ?
  Sb6 S9 Mn2 5_575 . . 143.84(19) ?
  Sb6 S9 S7 5_575 . . 160.6(5) ?
  Sb6 S9 S7 5_575 . 1_565 110.03(15) ?
  Sb6' S9 Sb6' 5_565 . 5_575 67.9(2) ?
  Sb6' S9 Mn2 5_565 . . 143.84(19) ?
  Sb6' S9 S7 5_565 . . 110.03(15) ?
  Sb6' S9 S7 5_565 . 1_565 160.6(5) ?
  Sb6' S9 Mn2 5_575 . . 143.84(19) ?
  Sb6' S9 S7 5_575 . . 160.6(5) ?
  Sb6' S9 S7 5_575 . 1_565 110.03(15) ?
  Mn2 S9 S7 . . . 47.3(2) ?
  Mn2 S9 S7 . . 1_565 47.3(2) ?
  S7 S9 S7 . . 1_565 65.1(2) ?
  Tl2 S10 Tl2 1_545 . . 70.4(3) ?
  Tl2 S10 Sb3 1_545 . . 101.5(4) ?
  Tl2 S10 Sb3' 1_545 . . 101.5(4) ?
  Tl2 S10 Sb6 1_545 . . 95.60(15) ?
  Tl2 S10 Sb6 1_545 . 1_565 155.2(4) ?
  Tl2 S10 Sb6' 1_545 . . 95.60(15) ?
  Tl2 S10 Sb6' 1_545 . 1_565 155.2(4) ?
  Tl2 S10 S11 1_545 . . 105.9(2) ?
  Tl2 S10 S11 1_545 . 1_565 153.4(5) ?
  Tl2 S10 Sb3 . . . 101.5(4) ?
  Tl2 S10 Sb3' . . . 101.5(4) ?
  Tl2 S10 Sb6 . . . 155.2(4) ?
  Tl2 S10 Sb6 . . 1_565 95.60(15) ?
  Tl2 S10 Sb6' . . . 155.2(4) ?
  Tl2 S10 Sb6' . . 1_565 95.60(15) ?
  Tl2 S10 S11 . . . 153.4(5) ?
  Tl2 S10 S11 . . 1_565 105.9(2) ?
  Sb3 S10 Sb3' . . . 0.0(5) ?
  Sb3 S10 Sb6 . . . 101.3(4) ?
  Sb3 S10 Sb6 . . 1_565 101.3(4) ?
  Sb3 S10 Sb6' . . . 101.3(4) ?
  Sb3 S10 Sb6' . . 1_565 101.3(4) ?
  Sb3 S10 S11 . . . 52.6(3) ?
  Sb3 S10 S11 . . 1_565 52.6(3) ?
  Sb3' S10 Sb6 . . . 101.3(4) ?
  Sb3' S10 Sb6 . . 1_565 101.3(4) ?
  Sb3' S10 Sb6' . . . 101.3(4) ?
  Sb3' S10 Sb6' . . 1_565 101.3(4) ?
  Sb3' S10 S11 . . . 52.6(3) ?
  Sb3' S10 S11 . . 1_565 52.6(3) ?
  Sb6 S10 Sb6 . . 1_565 89.3(5) ?
  Sb6 S10 Sb6' . . . 0.0(5) ?
  Sb6 S10 Sb6' . . 1_565 89.3(5) ?
  Sb6 S10 S11 . . . 48.9(3) ?
  Sb6 S10 S11 . . 1_565 95.5(5) ?
  Sb6 S10 Sb6' 1_565 . . 89.3(5) ?
  Sb6 S10 Sb6' 1_565 . 1_565 0.0(5) ?
  Sb6 S10 S11 1_565 . . 95.5(5) ?
  Sb6 S10 S11 1_565 . 1_565 48.9(3) ?
  Sb6' S10 Sb6' . . 1_565 89.3(5) ?
  Sb6' S10 S11 . . . 48.9(3) ?
  Sb6' S10 S11 . . 1_565 95.5(5) ?
  Sb6' S10 S11 1_565 . . 95.5(5) ?
  Sb6' S10 S11 1_565 . 1_565 48.9(3) ?
  S11 S10 S11 . . 1_565 64.9(3) ?
  Sb3 S11 Sb3 1_545 . . 83.5(5) ?
  Sb3 S11 Sb3' 1_545 . 1_545 0.0(5) ?
  Sb3 S11 Sb3' 1_545 . . 83.5(5) ?
  Sb3 S11 Sb6 1_545 . . 96.4(4) ?
  Sb3 S11 Sb6 1_545 . 6_547 98.02(12) ?
  Sb3 S11 Sb6 1_545 . 6_557 165.6(5) ?
  Sb3 S11 Sb6' 1_545 . . 96.4(4) ?
  Sb3 S11 Sb6' 1_545 . 6_547 98.02(12) ?
  Sb3 S11 Sb6' 1_545 . 6_557 165.6(5) ?
  Sb3 S11 S10 1_545 . 1_545 47.3(3) ?
  Sb3 S11 S10 1_545 . . 92.1(5) ?
  Sb3 S11 Sb3' . . 1_545 83.5(5) ?
  Sb3 S11 Sb3' . . . 0.0(5) ?
  Sb3 S11 Sb6 . . . 96.4(4) ?
  Sb3 S11 Sb6 . . 6_547 165.6(5) ?
  Sb3 S11 Sb6 . . 6_557 98.02(12) ?
  Sb3 S11 Sb6' . . . 96.4(4) ?
  Sb3 S11 Sb6' . . 6_547 165.6(5) ?
  Sb3 S11 Sb6' . . 6_557 98.02(12) ?
  Sb3 S11 S10 . . 1_545 92.1(5) ?
  Sb3 S11 S10 . . . 47.3(3) ?
  Sb3' S11 Sb3' 1_545 . . 83.5(5) ?
  Sb3' S11 Sb6 1_545 . . 96.4(4) ?
  Sb3' S11 Sb6 1_545 . 6_547 98.02(12) ?
  Sb3' S11 Sb6 1_545 . 6_557 165.6(5) ?
  Sb3' S11 Sb6' 1_545 . . 96.4(4) ?
  Sb3' S11 Sb6' 1_545 . 6_547 98.02(12) ?
  Sb3' S11 Sb6' 1_545 . 6_557 165.6(5) ?
  Sb3' S11 S10 1_545 . 1_545 47.3(3) ?
  Sb3' S11 S10 1_545 . . 92.1(5) ?
  Sb3' S11 Sb6 . . . 96.4(4) ?
  Sb3' S11 Sb6 . . 6_547 165.6(5) ?
  Sb3' S11 Sb6 . . 6_557 98.02(12) ?
  Sb3' S11 Sb6' . . . 96.4(4) ?
  Sb3' S11 Sb6' . . 6_547 165.6(5) ?
  Sb3' S11 Sb6' . . 6_557 98.02(12) ?
  Sb3' S11 S10 . . 1_545 92.1(5) ?
  Sb3' S11 S10 . . . 47.3(3) ?
  Sb6 S11 Sb6 . . 6_547 97.7(4) ?
  Sb6 S11 Sb6 . . 6_557 97.7(4) ?
  Sb6 S11 Sb6' . . . 0.0(5) ?
  Sb6 S11 Sb6' . . 6_547 97.7(4) ?
  Sb6 S11 Sb6' . . 6_557 97.7(4) ?
  Sb6 S11 S10 . . 1_545 49.2(3) ?
  Sb6 S11 S10 . . . 49.2(3) ?
  Sb6 S11 Sb6 6_547 . 6_557 77.0(4) ?
  Sb6 S11 Sb6' 6_547 . . 97.7(4) ?
  Sb6 S11 Sb6' 6_547 . 6_547 0.0(5) ?
  Sb6 S11 Sb6' 6_547 . 6_557 77.0(4) ?
  Sb6 S11 S10 6_547 . 1_545 99.5(3) ?
  Sb6 S11 S10 6_547 . . 146.4(5) ?
  Sb6 S11 Sb6' 6_557 . . 97.7(4) ?
  Sb6 S11 Sb6' 6_557 . 6_547 77.0(4) ?
  Sb6 S11 Sb6' 6_557 . 6_557 0.0(5) ?
  Sb6 S11 S10 6_557 . 1_545 146.4(5) ?
  Sb6 S11 S10 6_557 . . 99.5(3) ?
  Sb6' S11 Sb6' . . 6_547 97.7(4) ?
  Sb6' S11 Sb6' . . 6_557 97.7(4) ?
  Sb6' S11 S10 . . 1_545 49.2(3) ?
  Sb6' S11 S10 . . . 49.2(3) ?
  Sb6' S11 Sb6' 6_547 . 6_557 77.0(4) ?
  Sb6' S11 S10 6_547 . 1_545 99.5(3) ?
  Sb6' S11 S10 6_547 . . 146.4(5) ?
  Sb6' S11 S10 6_557 . 1_545 146.4(5) ?
  Sb6' S11 S10 6_557 . . 99.5(3) ?
  S10 S11 S10 1_545 . . 64.9(3) ?
  Tl2 S12 Sb3 . . . 99.3(5) ?
  Tl2 S12 Sb3 . . 1_565 99.3(5) ?
  Tl2 S12 Sb3' . . . 99.3(5) ?
  Tl2 S12 Sb3' . . 1_565 99.3(5) ?
  Tl2 S12 Sb4 . . 1_545 93.5(4) ?
  Tl2 S12 Sb4 . . . 93.5(4) ?
  Tl2 S12 Sb4' . . 1_545 93.5(4) ?
  Tl2 S12 Sb4' . . . 93.5(4) ?
  Sb3 S12 Sb3 . . 1_565 77.8(5) ?
  Sb3 S12 Sb3' . . . 0.0(5) ?
  Sb3 S12 Sb3' . . 1_565 77.8(5) ?
  Sb3 S12 Sb4 . . 1_545 95.87(12) ?
  Sb3 S12 Sb4 . . . 166.5(6) ?
  Sb3 S12 Sb4' . . 1_545 95.87(12) ?
  Sb3 S12 Sb4' . . . 166.5(6) ?
  Sb3 S12 Sb3' 1_565 . . 77.8(5) ?
  Sb3 S12 Sb3' 1_565 . 1_565 0.0(5) ?
  Sb3 S12 Sb4 1_565 . 1_545 166.5(6) ?
  Sb3 S12 Sb4 1_565 . . 95.87(12) ?
  Sb3 S12 Sb4' 1_565 . 1_545 166.5(6) ?
  Sb3 S12 Sb4' 1_565 . . 95.87(12) ?
  Sb3' S12 Sb3' . . 1_565 77.8(5) ?
  Sb3' S12 Sb4 . . 1_545 95.87(12) ?
  Sb3' S12 Sb4 . . . 166.5(6) ?
  Sb3' S12 Sb4' . . 1_545 95.87(12) ?
  Sb3' S12 Sb4' . . . 166.5(6) ?
  Sb3' S12 Sb4 1_565 . 1_545 166.5(6) ?
  Sb3' S12 Sb4 1_565 . . 95.87(12) ?
  Sb3' S12 Sb4' 1_565 . 1_545 166.5(6) ?
  Sb3' S12 Sb4' 1_565 . . 95.87(12) ?
  Sb4 S12 Sb4 1_545 . . 87.6(6) ?
  Sb4 S12 Sb4' 1_545 . 1_545 0.0(5) ?
  Sb4 S12 Sb4' 1_545 . . 87.6(6) ?
  Sb4 S12 Sb4' . . 1_545 87.6(6) ?
  Sb4 S12 Sb4' . . . 0.0(5) ?
  Sb4' S12 Sb4' 1_545 . . 87.6(6) ?

loop_
 _geom_torsion_atom_site_label_1
 _geom_torsion_atom_site_label_2
 _geom_torsion_atom_site_label_3
 _geom_torsion_atom_site_label_4
 _geom_torsion_site_symmetry_1
 _geom_torsion_site_symmetry_2
 _geom_torsion_site_symmetry_3
 _geom_torsion_site_symmetry_4
 _geom_torsion
 _geom_torsion_publ_flag
 ? ? ? ? ? ? ? ? ? ?

loop_
 _geom_hbond_atom_site_label_D
 _geom_hbond_atom_site_label_H
 _geom_hbond_atom_site_label_A
 _geom_hbond_site_symmetry_D
 _geom_hbond_site_symmetry_H
 _geom_hbond_site_symmetry_A
 _geom_hbond_distance_DH
 _geom_hbond_distance_HA
 _geom_hbond_distance_DA
 _geom_hbond_angle_DHA
 _geom_hbond_publ_flag
 ? ? ? ? ? ? ? ? ? ? ?


#=======================================================================

# 11. STRUCTURE-FACTOR LIST

loop_
 _refln_index_h
 _refln_index_k
 _refln_index_l
 _refln_F_squared_calc
 _refln_F_squared_meas
 _refln_F_squared_sigma
 _refln_observed_status
   0   0   5   23217.   23385.    2593. o
   0   0   6  117190.  130817.    8071. o
   0   0   7  244202.  237858.   11390. o
   0   0   8    9818.    4379.    2032. <
   0   0   9  193916.  206622.    9188. o
   0   0  10    2259.    6115.    2641. <
   0   0  11   87730.   83901.    6635. o
   0   0  12   54636.   66191.    6175. o
   0   0  13  177652.  180913.   10658. o
   0   0  14   20655.   17832.    3695. o
   0   0  15     424.    1663.    2764. <
   0   0  16   26630.   22210.    4112. o
   0   0  17    4353.    4476.    2886. <
   0   0  18   19631.   21942.    3643. o
   0   0  19   15877.   14799.    3401. o
   0   0  20    3119.    9515.    3178. <
   0   0  21   54640.   72820.    6828. o
   0   0  22   27175.   26565.    5039. o
   0   0  23   91489.   92805.    7679. o
   0   0  24   17937.    7754.    5188. <
   0   0  25     619.   -9026.    6236. <
   0   0  26    2096.    9393.    7876. <
   0   0  27    8850.   14872.    9001. <
   0   2   0 3304060. 3393560.   51279. o
   0   2   1    2201.    9613.    2933. o
   0   2   2    5187.    9197.    2861. o
   0   2   3    2336.    3449.    2030. <
   0   2   4    1301.    1590.    2568. <
   0   2   5    8700.   11692.    3130. o
   0   2   6   65591.   66289.    7974. o
   0   2   7  130066.  129496.   11204. o
   0   2   8    9326.   12010.    3081. o
   0   2   9   80689.   81161.    6530. o
   0   2  10     553.    3327.    2054. <
   0   2  11   47609.   40336.    3509. o
   0   2  12   34087.   34955.    4989. o
   0   2  13   92748.   87962.    7712. o
   0   2  14   12315.   19985.    3885. o
   0   2  15     340.     391.    2519. <
   0   2  16   15043.    9369.    4478. <
   0   2  17    1855.    6066.    4769. <
   0   2  18   11728.    9833.    4379. <
   0   2  19   10281.    3131.    4795. <
   0   2  20    1660.   -4501.    4598. <
   0   2  21   27101.   27274.    6335. o
   0   2  22   21682.   30454.    7139. o
   0   2  23   59898.   63647.   10516. o
   0   2  24   11214.   17661.    6774. <
   0   2  25     207.   -6238.    6335. <
   0   2  26    1357.   -1859.    8512. <
   0   2  27    6000.     807.    5455. <
   0   2  28   19330.   26442.    8412. o
   0   2  29   14369.   54499.   16230. o
   0   2  30   10181.    8537.   11986. <
   0   4   0  605529.  634615.   32147. o
   0   4   1    6687.   26980.    7601. o
   0   4   2    1414.   12475.    5624. <
   0   4   3     215.    1663.    5186. <
   0   4   4     234.  -11203.    6016. <
   0   4   5     699.   -8659.    5062. <
   0   4   6   16164.    6702.    6313. <
   0   4   7   30488.   35004.    9049. o
   0   4   8    5403.   10176.    6922. <
   0   4   9   12372.   25488.    7823. o
   0   4  10      22.   -7607.    6799. <
   0   4  11   11249.   18933.    7214. <
   0   4  12   12601.   11546.    8023. <
   0   4  13   20558.    3180.    5458. <
   0   4  14    3497.    7558.    6677. <
   0   4  15     177.   -5210.    7411. <
   0   4  16    3571.   -4599.    5210. <
   1   1 -32   15758.   25757.   10956. <
   1   1 -31     674.   11154.    9368. <
   1   1 -30    1359.   14432.    9342. <
   1   1 -29    6606.    2886.    5749. <
   1   1 -28     620.    5699.    7705. <
   1   1 -27   20091.   10371.    5115. <
   1   1 -26   33214.   38037.    6650. o
   1   1 -25   10833.   12230.    4329. <
   1   1 -24   78823.   82115.    8778. o
   1   1 -23   26543.   32460.    5182. o
   1   1 -22    2350.    6042.    3326. <
   1   1 -21    1403.    3449.    2519. <
   1   1 -20     788.    2324.    3033. <
   1   1 -19    1356.    1027.    2886. <
   1   1 -18   28497.   25464.    3403. o
   1   1 -17   82854.   82311.    5431. o
   1   1 -16   28208.   25195.    3770. o
   1   1 -15  112363.  104301.    7255. o
   1   1 -14    1439.    -660.    1932. <
   1   1 -13   21340.   24730.    3618. o
   1   1 -12   15939.   15141.    2960. o
   1   1 -11  211101.  207722.    7228. o
   1   1 -10  556589.  557489.   14036. o
   1   1  -9  410272.  402382.    7828. o
   1   1  -8  119718.  122305.    4149. o
   1   1  -7   10744.   12646.    1392. o
   1   1  -6     394.     294.    1101. <
   1   1  -5  367931.  371195.    6705. o
   1   1  -4  542750.  559593.    8131. o
   1   1  -3   25342.   24461.    1860. o
   1   1  -2    6862.    9589.    1662. o
   1   1  -1     601.    4623.    1932. <
   1   1   0   20250.   24999.    2882. o
   1   1   1   91407.   93416.    4496. o
   1   1   2  687674.  721426.    8014. o
   1   1   3     295.    -856.    1247. <
   1   1   4   30804.   33609.    2049. o
   1   1   5    4097.    3669.    1223. <
   1   1   6      53.     220.    1101. <
   1   1   7   76307.   72038.    3631. o
   1   1   8    1579.     -73.    1223. <
   1   1   9  122288.  116556.    5592. o
   1   1  10     673.    2911.    1590. <
   1   1  11   78730.   77541.    4894. o
   1   1  12   29888.   31334.    4133. o
   1   1  13  169216.  173330.    9139. o
   1   1  14    6099.    7510.    2886. <
   1   1  15   11058.   10371.    3009. o
   1   1  16   23957.   26026.    4230. o
   1   1  17   85652.   88671.    7456. o
   1   1  18  238185.  240891.   11882. o
   1   1  19    2268.    6091.    2641. <
   1   1  20   11892.   14799.    3399. o
   1   1  21  113762.  111640.    7098. o
   1   1  22   14860.   11864.    3157. o
   1   1  23    8910.    5748.    3401. <
   1   1  24   54320.   62987.    9974. o
   1   1  25    4487.   12451.    6456. <
   1   1  26    6335.   11741.    6163. <
   1   1  27    3200.   -1639.    5920. <
   1   1  28    7425.   -4012.    7461. <
   1   1  29    4314.   -5259.    5479. <
   1   1  30    5905.   19202.    9758. <
   1   1  31   16643.   18370.   10493. <
   1   3 -26   14447.   10958.    6605. <
   1   3 -25    4586.   37866.   15183. <
   1   3 -24   32710.   76758.   13503. o
   1   3 -23   16002.   21795.    8193. <
   1   3 -22    1606.   -1248.    5308. <
   1   3 -21     243.   -5259.    5332. <
   1   3 -20     261.   -7828.    6261. <
   1   3 -19     156.    9026.    5747. <
   1   3 -18    9153.   11912.    5528. <
   1   3 -17   34142.   37450.    8584. o
   1   3 -16    9451.   12426.    6115. <
   1   3 -15   39171.   40312.    8243. o
   1   3 -14     159.    7461.    5063. <
   1   3 -13    6028.    9026.    5136. <
   1   3 -12    3633.     489.    4672. <
   1   3 -11   67200.   62987.   10497. o
   1   3 -10  168414.  177929.   16842. o
   1   3  -9   87308.   87179.   11790. o
   1   3  -8   21375.   26760.    7703. o
   1   3  -7    2042.   12866.    6480. <
   1   3  -6    1081.      73.    3767. <
   1   3  -5  117818.  116948.    9859. o
   1   3  -4  158872.  154153.   11235. o
   1   3  -3    9028.   10616.    4207. <
   1   3  -2    3725.    1370.    2618. <
   1   3  -1    2263.    1370.    3596. <
   1   3   0    2456.   -2862.    3326. <
   1   3   1   11617.   12304.    3816. o
   1   3   2  184459.  186710.   10685. o
   1   3   3     154.   -2984.    2886. <
   1   3   4    6455.    -122.    4672. <
   1   3   5    1786.    9246.    5233. <
   1   3   6      28.    7999.    4916. <
   1   3   7   18608.   21917.    6921. o
   1   3   8     798.   -6091.    5821. <
   1   3   9   39407.   35126.    7708. o
   1   3  10     292.   -1199.    4550. <
   1   3  11   27628.   21477.    7072. o
   1   3  12    2644.    1370.    4427. <
   1   3  13   47534.   46427.    9345. o
   1   3  14    5970.    4917.    6507. <
   1   3  15    5771.    3473.    4330. <
   1   3  16    7024.    8341.    5650. <
   1   3  17   35406.   34930.    8659. o
   1   3  18   91334.  101537.   14056. o
   1   3  19    1815.     -98.    5235. <
   1   3  20    2551.   10078.    8120. <
   1   3  21   35539.   28277.    7709. o
   1   3  22    3554.   15362.    7703. <
   1   3  23    3548.   -4256.    5944. <
   1   3  24   20370.   20156.    9956. <
   2   0 -27   34215.   39529.   10565. o
   2   0 -26   11394.   14261.    4940. <
   2   0 -25    7380.    4843.    3865. <
   2   0 -24   23233.   23678.    5381. o
   2   0 -23   10200.   11521.    3595. o
   2   0 -22   93430.  103959.    8228. o
   2   0 -21   37674.   32631.    4701. o
   2   0 -20  105668.  100901.    7591. o
   2   0 -19   29777.   34759.    4398. o
   2   0 -18    1624.    1688.    2104. <
   2   0 -17   61214.   54401.    6269. o
   2   0 -16   81636.   85271.    7456. o
   2   0 -15  317495.  301506.   13302. o
   2   0 -14     954.     685.    2226. <
   2   0 -13   53135.   58217.    5595. o
   2   0 -12   44873.   42244.    4626. o
   2   0 -11  167628.  169172.    8705. o
   2   0 -10  320622.  325697.   11651. o
   2   0  -9  562713.  582806.   14532. o
   2   0  -8 1062420. 1039960.   18596. o
   2   0  -7  463558.  492203.    9015. o
   2   0  -6   83221.   85466.    3785. o
   2   0  -5     630.   -1517.    1908. <
   2   0   3    1022.      24.    1663. <
   2   0   4   26796.   27568.    4500. o
   2   0   5   15459.   20523.    2196. o
   2   0   6    4043.    6286.    1516. o
   2   0   7   63014.   59489.    4360. o
   2   0   8   19768.   20327.    2886. o
   2   0   9  218089.  207673.    9348. o
   2   0  10    1270.    5284.    2347. <
   2   0  11  145484.  146007.    8732. o
   2   0  12     608.    1321.    2177. <
   2   0  14   71515.   69787.    6704. o
   2   0  15    6495.    9809.    3350. <
   2   0  16     289.    -342.    2544. <
   2   0  17    4286.    9148.    3864. <
   2   0  18    6034.    4843.    3033. <
   2   0  19   53702.   70105.    8277. o
   2   0  20   86761.   87203.    9148. o
   2   0  21   20198.   20767.    5455. o
   2   0  22  122751.  109536.   16864. o
   2   0  23     406.    3816.    5063. <
   2   0  24    1008.   -5993.    6457. <
   2   0  25   14278.   23507.    9513. <
   2   0  26  106289.  135954.   20476. o
   2   0  27   24259.   19202.   10152. <
   2   0  28    4931.   12915.    9001. <
   2   2 -30     239.   10494.    9759. <
   2   2 -29    3557.    8561.    9613. <
   2   2 -28    1526.  -23972.   11957. <
   2   2 -27   21545.   26393.    7116. o
   2   2 -26    7310.    2201.    4159. <
   2   2 -25    4152.   11546.    5771. <
   2   2 -24   13495.   15386.    6090. <
   2   2 -23    7878.    3889.    3694. <
   2   2 -22   55648.   55991.    9197. o
   2   2 -21   21562.   12720.    5849. <
   2   2 -20   53904.   61006.    9902. o
   2   2 -19   20187.   22210.    6555. o
   2   2 -18    1612.    2642.    4990. <
   2   2 -17   27577.   26026.    6997. o
   2   2 -16   42863.   48922.    8851. o
   2   2 -15  182591.  190575.   15276. o
   2   2 -14     519.   -1492.    3522. <
   2   2 -13   26197.   28154.    4548. o
   2   2 -12   23016.   21624.    3621. o
   2   2 -11   86745.   85173.    6754. o
   2   2 -10  166017.  168683.    9534. o
   2   2  -9  292860.  307841.   13020. o
   2   2  -8  509111.  492448.   16254. o
   2   2  -7  192149.  193828.    8385. o
   2   2  -6   32936.   30968.    3427. o
   2   2  -5     600.     -49.    1884. <
   2   2  -4     317.    2666.    2593. <
   2   2  -3   10780.   11007.    3082. o
   2   2  -2   29534.   33463.    4081. o
   2   2  -1    1681.    -269.    2079. <
   2   2   0    1910.    7143.    3154. <
   2   2   1    2429.    2886.    2079. <
   2   2   2   11302.    9907.    2667. o
   2   2   3     402.    -342.    2079. <
   2   2   4   23032.   29867.    4275. o
   2   2   5    5315.    3889.    2789. <
   2   2   6    1892.    1052.    2275. <
   2   2   7   39816.   41853.    5012. o
   2   2   8   11765.   12084.    3082. o
   2   2   9  102883.  111982.    8498. o
   2   2  10     459.    3498.    2201. <
   2   2  11   72711.   76074.    6845. o
   2   2  12    1801.    -881.    3522. <
   2   2  13  423579.  449665.   17091. o
   2   2  14   50076.   52322.    6480. o
   2   2  15    3545.    1908.    3302. <
   2   2  16     522.    3302.    3351. <
   2   2  17    3914.    4696.    3547. <
   2   2  18    4084.    8586.    4965. <
   2   2  19   31600.   26124.    6583. o
   2   2  20   54966.   55820.    9148. o
   2   2  21   13242.   17196.    5918. <
   2   2  22   71058.   74826.   10833. o
   2   2  23      55.     758.    4696. <
   2   2  24     579.    8806.    6506. <
   2   2  25    6635.    9491.    6628. <
   2   2  26   63184.   69860.   12544. o
   2   2  27   16545.   17392.    7778. <
   2   2  28    2808.  -10127.   11276. <
   2   2  29      20.     -98.    7314. <
   2   4 -16    8708.   18492.   12523. <
   2   4 -15   45460.   48188.   11642. o
   2   4 -14     101.   -2789.    4868. <
   2   4 -13    4619.    6507.    5675. <
   2   4 -12    5175.    2837.    5748. <
   2   4 -11   22880.   18884.    7071. <
   2   4 -10   48468.   36569.    8837. o
   2   4  -9   84254.   71573.   12509. o
   2   4  -8   86015.   89747.   13989. o
   2   4  -7   25277.   21257.    7169. <
   2   4  -6    4389.   10885.    5747. <
   2   4  -5     920.    2226.    4036. <
   2   4  -4     206.   -2837.    4256. <
   2   4  -3    4522.    7828.    4647. <
   2   4  -2    5703.    8415.    4598. <
   2   4  -1     200.   -1761.    4843. <
   2   4   0     545.    4599.    4916. <
   2   4   1    2561.   -4427.    5210. <
   2   4   2    4042.   24314.    5937. o
   2   4   3     102.    -709.    6384. <
   2   4   4    9607.   15948.    7484. <
   2   4   5     347.   16511.    7115. <
   2   4   6     184.    9051.    6383. <
   2   4   7   12671.    7143.    6141. <
   2   4   8    3444.   -1248.    4819. <
   2   4   9   21337.   45693.   10655. o
   2   4  10      81.    4109.    6702. <
   2   4  11   13507.   12940.    6164. <
   2   4  12    2496.  -14187.    7263. <
   2   4  13   89677.  100339.   15720. o
   2   4  14   19868.   21819.    9539. <
   2   4  15     651.   15459.   14039. <
   2   4  16     503.     196.    5137. <
   3   1 -31    3230.   -6409.    8488. <
   3   1 -30    7005.   22162.   11298. <
   3   1 -29   14891.   18810.    8903. <
   3   1 -28    1491.    8268.    5650. <
   3   1 -27    5834.    3571.    4036. <
   3   1 -26   48925.   47014.    6435. o
   3   1 -25     209.    1345.    2886. <
   3   1 -24   80806.   90432.    8574. o
   3   1 -23   22324.   21770.    4159. o
   3   1 -22    1970.    5699.    3791. <
   3   1 -21     108.     147.    4061. <
   3   1 -20   81205.   68662.    6597. o
   3   1 -19  130406.  125680.    8619. o
   3   1 -18    1099.     514.    2593. <
   3   1 -17  108374.  104301.    7516. o
   3   1 -16  202605.  204445.   10147. o
   3   1 -15   35685.   37034.    4500. o
   3   1 -14  220669.  213250.    9902. o
   3   1 -13  459429.  437435.   13443. o
   3   1 -12    6763.    4599.    1689. <
   3   1 -11   10057.   11668.    2470. o
   3   1 -10    2015.    4330.    2544. <
   3   1  -9    1463.    1052.    2837. <
   3   1  -8     272.    -245.    2397. <
   3   1  -7  100538.   94419.    7714. o
   3   1  -6  756018.  735907.   15089. o
   3   1  -5   71638.   66436.    4608. o
   3   1  -4   28080.   22210.    4040. o
   3   1  -3      50.    -465.    2740. <
   3   1  -2   10102.    8072.    2569. o
   3   1  -1   11254.    8830.    2105. o
   3   1   0   16254.   17196.    3204. o
   3   1   1   16686.   14750.    1837. o
   3   1   2   69510.   69225.    3694. o
   3   1   3  439141.  448075.   12952. o
   3   1   4   59523.   54670.    2776. o
   3   1   5    2226.    1199.    1101. <
   3   1   6   11723.   10322.    1713. o
   3   1   7   64656.   58511.    4193. o
   3   1   8  286470.  295072.    9533. o
   3   1   9  702216.  695327.   15204. o
   3   1  10  162824.  155620.    7430. o
   3   1  11   52252.   54108.    4596. o
   3   1  12    1003.    5920.    3008. <
   3   1  13   63291.   66485.    6282. o
   3   1  14   38752.   39040.    5210. o
   3   1  15  127381.  139770.    9568. o
   3   1  16   44393.   47748.    6014. o
   3   1  17   74423.   79865.    6180. o
   3   1  18   43864.   40874.    4358. o
   3   1  19    8827.   12646.    4108. o
   3   1  20    9023.   16218.    3739. o
   3   1  21   36137.   37939.    4915. o
   3   1  22   37570.   32533.    6168. o
   3   1  23    4194.    5822.    4232. <
   3   1  24     978.     -98.    4892. <
   3   1  25     565.   -2006.    4452. <
   3   1  26   13486.   27201.    8802. o
   3   1  27      70.   10910.    6848. <
   3   1  28    2486.   16266.    9636. <
   3   1  29   15122.    4843.    6410. <
   3   1  30     209.   -9564.    8976. <
   3   1  31    8671.   21550.   10369. <
   3   3 -27    2699.    8366.    8634. <
   3   3 -26   18145.   20156.   10444. <
   3   3 -25     149.   -3767.    7167. <
   3   3 -24   35172.   24485.    8394. <
   3   3 -23    8419.    4281.    5333. <
   3   3 -22    1077.   13258.    6651. <
   3   3 -21      73.    7289.    5943. <
   3   3 -20   37417.   40018.    9392. o
   3   3 -19   46343.   57214.   11515. o
   3   3 -18     437.     905.    4648. <
   3   3 -17   31898.   36960.    8926. o
   3   3 -16   54773.   49191.    9225. o
   3   3 -15    4529.    9222.    6922. <
   3   3 -14   72382.   71181.   10935. o
   3   3 -13  156769.  155376.   16342. o
   3   3 -12    1950.   -1566.    4794. <
   3   3 -11    3089.    4452.    6751. <
   3   3 -10    2523.   11961.    6725. <
   3   3  -9    1071.    2568.    4403. <
   3   3  -8    1099.    8757.    4769. <
   3   3  -7   11875.   13845.    5063. <
   3   3  -6  179652.  174382.   12166. o
   3   3  -5   22552.   14138.    5042. <
   3   3  -4   12629.   40899.    7765. o
   3   3  -3     255.    5406.    4574. <
   3   3  -2    3899.    9638.    4353. <
   3   3  -1    4078.    5137.    3571. <
   3   3   0    4817.    9687.    4035. <
   3   3   1    6313.    4917.    3645. <
   3   3   2   19011.   23238.    4865. o
   3   3   3  135055.  145127.   11090. o
   3   3   4   10311.   15533.    4548. o
   3   3   5    2701.    4574.    3816. <
   3   3   6    7018.   20621.    6405. o
   3   3   7   21595.   26956.    7336. o
   3   3   8   98718.  106430.   12614. o
   3   3   9  232027.  242995.   19014. o
   3   3  10   60639.   66778.   10171. o
   3   3  11   15095.   24706.    6209. o
   3   3  12     589.    2593.    4819. <
   3   3  13   18094.   21574.    7533. <
   3   3  14    6098.    2153.    5064. <
   3   3  15   37687.   36398.    8122. o
   3   3  16   15023.   20572.    6676. o
   3   3  17   22188.   23898.    7435. o
   3   3  18   18135.   18199.    5773. o
   3   3  19    4498.    1370.    3963. <
   3   3  20    2440.     318.    4574. <
   3   3  21   14574.   26662.    9243. <
   3   3  22   16919.   11546.    6263. <
   4   0 -28   30370.   39064.   11909. o
   4   0 -27    2435.   -3033.    6629. <
   4   0 -26    4714.   12671.    4964. <
   4   0 -25    7662.   14505.    4425. o
   4   0 -24  183350.  169343.   13793. o
   4   0 -23   40219.   43198.    5966. o
   4   0 -22   13148.    7412.    3280. <
   4   0 -21   14231.   15362.    4965. o
   4   0 -20  120844.  124531.    9901. o
   4   0 -19   75922.   76074.    7681. o
   4   0 -18   22213.   22431.    4525. o
   4   0 -17   19825.   17025.    3817. o
   4   0 -16  351705.  362071.   15578. o
   4   0 -15  100480.  116092.    9126. o
   4   0 -14  200917.  204298.   11245. o
   4   0 -13   45701.   51148.    5914. o
   4   0 -12      55.   -2740.    2103. <
   4   0 -11   29069.   36153.    3637. o
   4   0 -10   22765.   24143.    3203. o
   4   0  -9    9066.   10371.    2250. o
   4   0  -8   27033.   29744.    3471. o
   4   0  -7   16754.   16609.    2324. o
   4   0  -6  288139.  305077.    8786. o
   4   0  -5    1371.    4843.    1883. <
   4   0  -4   10541.   11619.    2641. o
   4   0  -3   72665.   65091.    5222. o
   4   0  -2  148230.  138840.    7872. o
   4   0  -1   13606.    9980.    1764. o
   4   0   0   39875.   40630.    5087. o
   4   0   1   12537.   11350.    3205. o
   4   0   2  154708.  160341.   11242. o
   4   0   3  224166.  238323.   14919. o
   4   0   4  133039.  115969.   11006. o
   4   0   5 1405430. 1336840.   37432. o
   4   0   6  795249.  765309.   29545. o
   4   0   7   21517.   27029.    6259. o
   4   0   8   88817.   78813.    6253. o
   4   0   9    1578.    3889.    2103. <
   4   0  10     152.    -196.    1614. <
   4   0  11  133710.  134413.    8756. o
   4   0  12   14832.   36496.    4459. o
   4   0  13  108118.  118464.    8398. o
   4   0  14   69704.   60321.    6566. o
   4   0  15   66554.   64210.    7194. o
   4   0  16   11705.   10225.    2887. o
   4   0  17   17940.   16707.    5039. o
   4   0  18   64077.   78862.    8276. o
   4   0  19     336.   15826.    9195. <
   4   0  20     150.   22798.   10343. <
   4   0  21   47997.   52762.   12962. o
   4   0  22    4544.   -5528.    5626. <
   4   0  23    8906.   26296.   10734. <
   4   0  24   44422.   26100.   10720. <
   4   0  25   28745.   40385.   11566. o
   4   0  26   13847.    7852.    7241. <
   4   0  27    5686.    7779.    5503. <
   4   0  28     889.    3449.    8072. <
   4   2 -30    7982.    4305.    6752. <
   4   2 -29   11044.    3963.    5651. <
   4   2 -28   18234.   18444.    6776. <
   4   2 -27    1128.    5259.    4794. <
   4   2 -26    3411.   15312.    7042. <
   4   2 -25    3316.    4794.    6164. <
   4   2 -24  106149.   92731.   12414. o
   4   2 -23   26247.   40874.    8211. o
   4   2 -22    7559.    4868.    6678. <
   4   2 -21    9485.    7387.    3841. <
   4   2 -20   76967.   80061.   10956. o
   4   2 -19   45627.   44054.    8318. o
   4   2 -18   14633.   18492.    6041. o
   4   2 -17   15156.   20621.    6774. o
   4   2 -16  171849.  181133.   15618. o
   4   2 -15   41085.   42513.    8022. o
   4   2 -14  114134.  117902.   12324. o
   4   2 -13   23990.   19618.    6362. o
   4   2 -12      23.    6091.    5772. <
   4   2 -11   15325.   14187.    3523. o
   4   2 -10   10741.   15459.    3226. o
   4   2  -9    5848.    4134.    2031. <
   4   2  -8   12659.   11937.    2667. o
   4   2  -7    4267.    4550.    2373. <
   4   2  -6  148375.  150875.    9388. o
   4   2  -5     688.    1199.    2642. <
   4   2  -4    9191.   10494.    3375. o
   4   2  -3   25512.   25024.    4208. o
   4   2  -2   92422.   92854.    7313. o
   4   2  -1    9040.    8439.    2764. o
   4   2   0   19725.   23189.    4670. o
   4   2   1    7105.   10102.    3301. o
   4   2   2   73535.   78250.    6769. o
   4   2   3  127423.  134731.    7298. o
   4   2   4   75781.   76905.    5673. o
   4   2   5  645525.  699681.   16489. o
   4   2   6  321394.  349571.   11791. o
   4   2   7    6334.   11961.    3178. o
   4   2   8   43496.   46867.    5598. o
   4   2   9    1890.    8170.    3546. <
   4   2  10     340.    3180.    2617. <
   4   2  11   74850.   75853.    7533. o
   4   2  12    7810.    9784.    3571. <
   4   2  13   65091.   68173.    7261. o
   4   2  14   33360.   30136.    5066. o
   4   2  15   34673.   35884.    5747. o
   4   2  16    6464.    7143.    3351. <
   4   2  17   13315.    7020.    3255. <
   4   2  18   33721.   39284.    6552. o
   4   2  19     181.   -6213.    4280. <
   4   2  20       7.    -514.    4525. <
   4   2  21   31492.   60394.   12436. o
   4   2  22    3794.    4721.    4378. <
   4   2  23    6098.   11130.    5870. <
   4   2  24   30066.   29157.    8708. o
   4   2  25   18130.   30527.    7627. o
   4   2  26    8429.   17196.    8584. <
   4   2  27    5246.   27519.   10929. <
   4   2  28     540.  -11203.    8487. <
   4   4 -16   29010.   18615.    8173. <
   4   4 -15    3077.   -9564.    7093. <
   4   4 -14   30013.   23140.    8099. <
   4   4 -13    4252.     832.    5553. <
   4   4 -12       9.    4745.    9564. <
   4   4 -11    2909.  -10787.    6945. <
   4   4 -10    1838.  -10689.    7141. <
   4   4  -9    1541.    -220.    8243. <
   4   4  -8    1711.    4207.    6604. <
   4   4  -7      11.    5871.    6677. <
   4   4  -6   36153.   39260.    9661. o
   4   4  -5     306.   -5871.    4818. <
   4   4  -4    3330.   -2935.    4207. <
   4   4  -3    2525.    1810.    5235. <
   4   4  -2   28790.   23458.    6191. o
   4   4  -1    2854.   13869.    6235. <
   4   4   0    3174.   -2691.    4329. <
   4   4   1    1769.   -2789.    4721. <
   4   4   2   14586.   31212.    8825. o
   4   4   3   35683.   39871.    8584. o
   4   4   4   20540.   11472.    7756. <
   4   4   5  110363.  108753.   14507. o
   4   4   6   47624.   51588.   10540. o
   4   4   7     677.    3058.    5919. <
   4   4   8   10336.    9564.    4061. <
   4   4   9    1356.    -269.    7265. <
   4   4  10     531.    3816.    5822. <
   4   4  11   17490.   28742.    8655. o
   4   4  12    1491.    3278.    7534. <
   4   4  13   18069.   15680.    7143. <
   4   4  14    5189.   18003.   11079. <
   4   4  15    7095.   -2935.    4721. <
   5   1 -30    7337.    2813.    7143. <
   5   1 -29   18644.   16364.    8978. <
   5   1 -28   16961.   19520.    6604. <
   5   1 -27    6084.   11276.    4940. <
   5   1 -26     261.    1370.    3767. <
   5   1 -25    4948.   10738.    4866. <
   5   1 -24  101967.  101415.    9296. o
   5   1 -23     235.   -2519.    3155. <
   5   1 -22   76525.   76343.   10005. o
   5   1 -21   21925.   24388.    6946. o
   5   1 -20    1457.    2104.    3694. <
   5   1 -19    3458.    3914.    2715. <
   5   1 -18      25.   -1345.    2470. <
   5   1 -17   15507.   16462.    3155. o
   5   1 -16    1476.    3376.    3057. <
   5   1 -15   40457.   40801.    4892. o
   5   1 -14  159748.  145029.    8422. o
   5   1 -13   15442.   13502.    3988. o
   5   1 -12   37620.   35688.    6068. o
   5   1 -11  122334.  118097.   10060. o
   5   1 -10   19502.   18688.    4452. o
   5   1  -9    3183.    -832.    4036. <
   5   1  -8    5542.     416.    3327. <
   5   1  -7  121834.  115187.    9061. o
   5   1  -6  353528.  358671.   10963. o
   5   1  -5   14461.   13111.    2643. o
   5   1  -4 1235700. 1180850.   22443. o
   5   1  -3  854230.  818072.   15715. o
   5   1  -2  206416.  207160.    7018. o
   5   1  -1  460659.  441765.   11998. o
   5   1   0  697189.  707777.   12797. o
   5   1   1  276819.  276360.    8001. o
   5   1   2   48836.   47894.    3622. o
   5   1   3  121808.  122305.    5380. o
   5   1   4   16932.   18908.    2004. o
   5   1   5   49305.   55844.    3314. o
   5   1   6   66661.   67390.    4377. o
   5   1   7  240539.  255128.    8707. o
   5   1   8  117006.  126781.    6386. o
   5   1   9  147422.  144907.    6855. o
   5   1  10    9722.   11986.    2543. o
   5   1  11   19966.   21428.    2885. o
   5   1  12    5677.   12744.    2810. o
   5   1  13   71801.   69860.    5507. o
   5   1  14   75105.   77370.    8412. o
   5   1  15     921.    2275.    2104. <
   5   1  16     126.    1419.    2960. <
   5   1  17    4574.    1957.    3572. <
   5   1  18    1832.   10738.    4107. <
   5   1  19   57005.   61593.    9830. o
   5   1  20   49336.   52077.    8780. o
   5   1  21   87069.   78691.   10819. o
   5   1  22   23229.   24803.    6799. o
   5   1  23   28994.   33732.    8926. o
   5   1  24     329.   -4843.    3718. <
   5   1  25      41.   -3155.    4868. <
   5   1  26   28656.   21892.    7390. <
   5   1  27     223.    8855.    5943. <
   5   1  28   17265.  -10151.    9711. <
   5   1  29    5323.    -881.    8439. <
   5   3 -26     271.    9099.    9368. <
   5   3 -25    4532.    7632.    6604. <
   5   3 -24   38408.   30845.    8809. o
   5   3 -23     371.   -5822.    4696. <
   5   3 -22   27204.   18810.    6094. o
   5   3 -21    7962.    7265.    5822. <
   5   3 -20     507.   -1737.    6360. <
   5   3 -19    2152.    -954.    6971. <
   5   3 -18      28.    3620.    6311. <
   5   3 -17    5291.    7485.    5577. <
   5   3 -16     884.    3351.    4623. <
   5   3 -15   20650.   16291.    6239. <
   5   3 -14   43267.   31799.    8323. o
   5   3 -13    7660.    8561.    7045. <
   5   3 -12   17050.   21795.    8707. <
   5   3 -11   41496.   31652.    7833. o
   5   3 -10    8169.   10151.    6188. <
   5   3  -9    1465.    3376.    4476. <
   5   3  -8    3520.     294.    3523. <
   5   3  -7   40594.   43076.    6456. o
   5   3  -6   98597.   83608.    8824. o
   5   3  -5    5606.   12646.    4523. <
   5   3  -4  300335.  298154.   15831. o
   5   3  -3  190505.  179959.   14253. o
   5   3  -2   84225.   85833.   10223. o
   5   3  -1  144896.  141898.   13213. o
   5   3   0  201245.  218510.   16092. o
   5   3   1   84182.  102271.   11356. o
   5   3   2   14341.    9760.    4576. <
   5   3   3   35763.   35297.    6018. o
   5   3   4   10360.    6384.    4061. <
   5   3   5    9132.   10004.    4158. <
   5   3   6   11234.   10347.    4746. <
   5   3   7   63212.   61055.    9810. o
   5   3   8   38442.   41437.    8119. o
   5   3   9   43124.   35419.    7832. o
   5   3  10    1842.    2128.    3791. <
   5   3  11    9186.   11619.    5112. <
   5   3  12    1023.    6727.    5503. <
   5   3  13   23814.   35248.    8263. o
   5   3  14   28422.   34294.    8338. o
   5   3  15    1135.    7461.    5112. <
   5   3  16     928.    3816.    5283. <
   5   3  17    2460.    3889.    5063. <
   5   3  18      57.   -1663.    4672. <
   5   3  19   17582.   27470.    6576. o
   5   3  20   18859.   31286.   10221. o
   5   3  21   34928.   32631.   15362. <
   6   0 -30    2242.    1321.    4550. <
   6   0 -29   12444.   11766.    7118. <
   6   0 -28      30.   14848.    9660. <
   6   0 -27    7687.   15875.    9856. <
   6   0 -26   34824.   40507.   12033. o
   6   0 -25   67403.   72013.   14307. o
   6   0 -24   70390.   75560.   13964. o
   6   0 -23    1597.   -2935.    3326. <
   6   0 -22   14670.   12304.    4379. <
   6   0 -21  129476.  138791.   11532. o
   6   0 -20   44718.   50194.    7065. o
   6   0 -19   47454.   49069.    6921. o
   6   0 -18    2721.     783.    3033. <
   6   0 -17   21275.   33658.    8189. o
   6   0 -16    5159.   14701.    4106. o
   6   0 -15  261214.  283649.   22838. o
   6   0 -14   57914.   57752.    6336. o
   6   0 -13  120236.  126512.    8918. o
   6   0 -12   15135.   21844.    4522. o
   6   0 -11  204797.  209899.    8448. o
   6   0 -10  174493.  176853.    7748. o
   6   0  -9   54692.   62082.    4489. o
   6   0  -8   22222.   30698.    5033. o
   6   0  -7  130296.  125558.    6444. o
   6   0  -6  172839.  163057.    7414. o
   6   0  -5  105133.   98700.    5737. o
   6   0  -4  163338.  160904.    7296. o
   6   0  -3  358389.  316622.   15323. o
   6   0  -2  597191.  561941.   21322. o
   6   0  -1  162462.  161246.   12281. o
   6   0   0   33821.   38281.    6773. o
   6   0   1    8173.    6164.    2960. <
   6   0   2    6158.    6556.    3718. <
   6   0   3  297405.  270440.   18663. o
   6   0   4    3731.    4158.    1883. <
   6   0   5  139172.  132358.   13242. o
   6   0   6     361.    3425.    3106. <
   6   0   7   32956.   22749.    6732. o
   6   0   8    3090.     489.    3302. <
   6   0   9    4335.    6042.    4183. <
   6   0  10  192345.  193853.   19420. o
   6   0  11   18155.   18615.    6776. <
   6   0  12   45975.   42171.    5727. o
   6   0  13   17490.   11325.    2890. o
   6   0  14   14350.   12304.    2814. o
   6   0  15  140150.  138400.   10130. o
   6   0  16   98214.   98284.   17269. o
   6   0  17    4462.   10494.    8512. <
   6   0  18  128943.  101537.   17559. o
   6   0  19     137.    3816.    5822. <
   6   0  20    2999.   10812.    8781. <
   6   0  21     244.   -6776.    7338. <
   6   0  22    2101.   -3204.    5063. <
   6   0  23    7986.   10616.    7485. <
   6   0  24    4725.    5039.    9075. <
   6   0  25    2674.    9320.    9539. <
   6   0  26   11641.    5968.    6312. <
   6   0  27   13393.    6164.    7315. <
   6   0  28    2672.   -5235.    8096. <
   6   0  29    1070.   -2128.    6653. <
   6   2 -31     780.    4207.    7876. <
   6   2 -30    1567.   29549.    7696. o
   6   2 -29    9174.   12451.    5674. <
   6   2 -28       3.   13600.    7214. <
   6   2 -27    4447.    7485.    5626. <
   6   2 -26   24146.   21844.    7902. <
   6   2 -25   43286.   37205.    9029. o
   6   2 -24   42968.   33609.    7417. o
   6   2 -23      30.    2715.    5381. <
   6   2 -22    6639.   18346.    6748. <
   6   2 -21   76545.   65458.   10405. o
   6   2 -20   25618.   39578.    8995. o
   6   2 -19   27937.   28204.    6849. o
   6   2 -18    1586.   11888.    5453. <
   6   2 -17   10841.   13454.    6164. <
   6   2 -16    2617.   -7730.    6971. <
   6   2 -15  138086.  136223.   13994. o
   6   2 -14   39213.   46158.    8630. o
   6   2 -13   68419.   69836.   10688. o
   6   2 -12   13453.   11961.    4159. <
   6   2 -11  102926.  100070.    8150. o
   6   2 -10   95646.   88524.    8131. o
   6   2  -9   28089.   26222.    2840. o
   6   2  -8   10488.   13551.    3350. o
   6   2  -7   70129.   69665.    5333. o
   6   2  -6  102113.  103788.    6577. o
   6   2  -5   55543.   66827.    7547. o
   6   2  -4   90584.   87913.   13040. o
   6   2  -3  161646.  169783.   17358. o
   6   2  -2  275122.  267162.   21586. o
   6   2  -1   72925.   72233.   11350. o
   6   2   0   19228.   17049.    4551. o
   6   2   1    2708.    1541.    2544. <
   6   2   2    3568.    3718.    2666. <
   6   2   3  132864.  130817.   10057. o
   6   2   4    2180.    3425.    2642. <
   6   2   5   65505.   76905.    6589. o
   6   2   6     946.    3816.    2103. <
   6   2   7   11340.    7828.    3621. <
   6   2   8    1311.    4281.    3889. <
   6   2   9    3798.    8219.    3937. <
   6   2  10   93694.  102100.    9064. o
   6   2  11   13406.    9760.    3597. <
   6   2  12   33001.   40678.    6330. o
   6   2  13   10150.   11546.    3889. <
   6   2  14    6501.    6311.    3425. <
   6   2  15   80700.   94248.    8912. o
   6   2  16   61330.   52958.    7346. o
   6   2  17    4154.   10029.    3423. <
   6   2  18   72602.   71450.    7658. o
   6   2  19      69.    2006.    5357. <
   6   2  20    2117.   -5259.    6359. <
   6   2  21      50.    8366.    6653. <
   6   2  22    1986.   -7020.    7436. <
   6   2  23    4215.     220.    6776. <
   6   2  24    3189.   -1932.    5895. <
   6   2  25    1984.    3082.    6409. <
   6   2  26    7927.   10983.   10469. <
   6   4 -15   29778.   36691.   10785. o
   6   4 -14   14281.   15802.    7362. <
   6   4 -13   16514.   23091.    8926. <
   6   4 -12    7820.    5014.    8562. <
   6   4 -11   20878.   12646.    6264. <
   6   4 -10   25676.   17172.    6559. <
   6   4  -9    5244.    5088.    6140. <
   6   4  -8    2384.   16340.    9562. <
   6   4  -7   15570.   18762.   10762. <
   6   4  -6   27924.   26589.   10665. <
   6   4  -5   11313.   22308.    9708. <
   6   4  -4   21733.   22260.    6335. o
   6   4  -3   24886.   29206.    6627. o
   6   4  -2   35315.   39529.    8804. o
   6   4  -1   11431.   16389.    6530. <
   6   4   0    6577.   18321.    6185. <
   6   4   1      81.   14848.    6895. <
   6   4   2    1218.   -3449.    4305. <
   6   4   3   23843.   29451.    8437. o
   6   4   4     401.   17881.    7996. <
   6   4   5   11885.   12182.    9026. <
   6   4   6    1123.   12304.    7728. <
   6   4   7     666.    7216.    8316. <
   6   4   8      98.   -1125.    9882. <
   6   4   9    1496.    3180.    8219. <
   6   4  10   16489.   30601.    8899. o
   6   4  11    6241.    2495.    5382. <
   6   4  12   14040.   25195.    8166. o
   6   4  13    2793.   -3522.    5528. <
   6   4  14     791.    9099.    7068. <
   6   4  15   19772.   32215.   11518. <
   7   1 -32    1627.   -2715.    5332. <
   7   1 -31   19851.   16487.   10054. <
   7   1 -30   47490.   65849.   11167. o
   7   1 -29   12112.   16829.    6505. <
   7   1 -28      22.    8879.    5527. <
   7   1 -27     774.    1468.    4452. <
   7   1 -26   14245.   15435.    4280. o
   7   1 -25     239.   -1786.    2886. <
   7   1 -24   59472.   52322.    6709. o
   7   1 -23   14955.   14236.    5871. <
   7   1 -22   66621.   72038.   10563. o
   7   1 -21    1976.   -2177.    4892. <
   7   1 -20   25671.   20767.    6704. o
   7   1 -19  164211.  155743.   13343. o
   7   1 -18   16433.   17465.    3717. o
   7   1 -17   53430.   53325.    6164. o
   7   1 -16   31668.   29891.    3671. o
   7   1 -15   47221.   40238.    6610. o
   7   1 -14   19474.   17490.    3646. o
   7   1 -13    2624.    4574.    2788. <
   7   1 -12    1814.    1321.    3547. <
   7   1 -11 1201220. 1119990.   45816. o
   7   1 -10   18539.   20327.    7264. <
   7   1  -9  250712.  221641.    7592. o
   7   1  -8   77919.   70056.    4224. o
   7   1  -7    1342.    -196.    1272. <
   7   1  -6   39178.   34734.    3186. o
   7   1  -5     507.   -1737.    1272. <
   7   1  -4    1585.    -440.    1419. <
   7   1  -3   10727.    8219.    1763. o
   7   1  -2   27625.   25635.    3231. o
   7   1  -1  283227.  270416.   10071. o
   7   1   0  215300.  211734.    7717. o
   7   1   1   26144.   29500.    2980. o
   7   1   2   21065.   19764.    2350. o
   7   1   3   27908.   25195.    2987. o
   7   1   4    2970.    6996.    2102. o
   7   1   5  211801.  215917.    7936. o
   7   1   6   15458.   15166.    2275. o
   7   1   7     524.    2495.    2128. <
   7   1   8     423.   -1688.    1957. <
   7   1   9   65452.   67806.    5207. o
   7   1  10    1545.    4134.    2397. <
   7   1  11  144777.  147279.    9829. o
   7   1  12  176739.  182943.   11167. o
   7   1  13  113431.  101660.    8383. o
   7   1  14   29251.   32802.    5526. o
   7   1  15    2002.    8733.    3790. <
   7   1  16   13203.   25244.    7726. o
   7   1  17   50308.   50830.    9613. o
   7   1  18   39237.   24485.    6759. o
   7   1  19    7017.    4868.    4305. <
   7   1  20    8680.    -660.    4159. <
   7   1  21     551.   10420.    6236. <
   7   1  22  114438.  144417.   16653. o
   7   1  23     402.     758.    5308. <
   7   1  24   20026.    7803.    5287. <
   7   1  25   12745.   14823.   10151. <
   7   1  26    5475.   -3009.    8512. <
   7   1  27    2622.   13038.    5379. <
   7   3 -25      74.  -10567.    7410. <
   7   3 -24   20990.   21379.    7412. <
   7   3 -23   11109.    8415.    6703. <
   7   3 -22   22487.   21966.    8782. <
   7   3 -21     895.    -660.    6507. <
   7   3 -20    7341.    7069.    7240. <
   7   3 -19   63951.   51955.   10062. o
   7   3 -18    6381.   13038.    6481. <
   7   3 -17   20325.   19495.    6947. <
   7   3 -16   13775.   13038.    6727. <
   7   3 -15   17196.   17465.    7950. <
   7   3 -14    4854.    9760.    5845. <
   7   3 -13     298.    3082.    4476. <
   7   3 -12    1033.   -1810.    6727. <
   7   3 -11  371526.  331323.   23261. o
   7   3 -10   18502.    9833.    6068. <
   7   3  -9   68262.   61715.    8029. o
   7   3  -8   28352.   42538.    7599. o
   7   3  -7     710.     930.    3302. <
   7   3  -6    8142.    7412.    3523. <
   7   3  -5      95.    2201.    3938. <
   7   3  -4     285.    1859.    4012. <
   7   3  -3    4479.    4917.    4085. <
   7   3  -2    3600.    5993.    3791. <
   7   3  -1   59243.   75633.    9893. o
   7   3   0   58305.   54744.    8442. o
   7   3   1   11810.   18052.    5526. o
   7   3   2    6443.    9907.    4011. <
   7   3   3   10121.   11815.    4647. <
   7   3   4     633.   -4452.    4818. <
   7   3   5   66095.   61421.    8761. o
   7   3   6    6367.    9417.    4794. <
   7   3   7     322.  -12500.    8364. <
   7   3   8     405.   -3889.    3546. <
   7   3   9   20691.   24828.    5061. o
   7   3  10       7.    1908.    3791. <
   7   3  11   66524.   66534.    7485. o
   7   3  12   67653.   79645.    8108. o
   7   3  13   38997.   27176.    6220. o
   7   3  14   14257.   17343.    4842. o
   7   3  15     402.   -4990.    5626. <
   7   3  16    4947.   12353.    5869. <
   7   3  17   19847.   34074.    7576. o
   7   3  18   16870.   14016.    7730. <
   7   3  19    1330.  -13233.    6847. <
   8   0 -32   10997.    9711.    6727. <
   8   0 -31    7312.   16536.    8804. <
   8   0 -30    6469.    7999.    7387. <
   8   0 -29    2935.   13576.    9318. <
   8   0 -28   37508.   46525.   13254. o
   8   0 -27    1329.    1419.    5822. <
   8   0 -26     172.   -4721.    6702. <
   8   0 -25    2872.    6360.    6408. <
   8   0 -24   66846.   54915.   12506. o
   8   0 -23   25793.   39064.   10807. o
   8   0 -22   21602.   37132.   11100. o
   8   0 -21   97259.  109805.   16966. o
   8   0 -20    7094.   -2886.    7754. <
   8   0 -19  240481.  257305.   25346. o
   8   0 -18   16598.   22455.    9612. <
   8   0 -17   47335.   40630.   10790. o
   8   0 -16  115981.  109218.   15538. o
   8   0 -15  136674.  167239.   18290. o
   8   0 -14   18769.   22260.    6970. o
   8   0 -13   50527.   48261.    9615. o
   8   0 -12  153398.  169857.   18010. o
   8   0 -11   91194.   91288.   12695. o
   8   0 -10  784456.  845028.   35962. o
   8   0  -9  512538.  523146.   13502. o
   8   0  -8   52248.   47919.    4824. o
   8   0  -7   11770.    9907.    1958. o
   8   0  -6   96594.  101024.   10073. o
   8   0  -5   71972.   65971.    8103. o
   8   0  -4   19982.   17343.    4575. o
   8   0  -3     658.    2666.    3204. <
   8   0  -2   15125.   13869.    4257. o
   8   0  -1   25273.   23556.    5015. o
   8   0   0   44418.   37058.    7270. o
   8   0   1  345593.  360187.   21986. o
   8   0   2   85628.   72624.   10921. o
   8   0   3   30012.   25733.    6949. o
   8   0   4    2372.    1272.    3645. <
   8   0   5   23424.   20841.    3598. o
   8   0   6   21062.   26809.    7874. o
   8   0   7  458825.  469014.   30288. o
   8   0   8  150198.  153688.   17853. o
   8   0   9   56864.   55967.   12769. o
   8   0  10  111670.   92218.   14033. o
   8   0  11  152432.  132309.   18706. o
   8   0  12     193.    4574.    6580. <
   8   0  13    7500.   14408.    6065. <
   8   0  14    4893.   -2495.    4868. <
   8   0  15   11464.    5626.    5945. <
   8   0  16    1779.    1517.    7240. <
   8   0  17   28648.   38991.   12618. o
   8   0  18   52415.   63868.   14573. o
   8   0  19    3446.    2471.    8317. <
   8   0  20   46760.   35077.   11990. <
   8   0  21     961.    4599.    7338. <
   8   0  22    6380.   -3058.    6702. <
   8   0  23   28982.   58315.   16158. o
   8   0  24     167.    4794.    6286. <
   8   0  25      52.    2226.    7558. <
   8   0  26   22543.   18003.   11253. <
   8   0  27      92.      98.    6238. <
   8   0  28    1036.   -2911.    6947. <
   8   2 -31    4046.   -1174.    5504. <
   8   2 -30    4639.    1492.    5406. <
   8   2 -29    1796.    7681.    6139. <
   8   2 -28   23954.   21868.    7364. <
   8   2 -27     803.    2226.    5577. <
   8   2 -26     117.    2544.    4819. <
   8   2 -25    1945.   -8023.    6041. <
   8   2 -24   42674.   35884.    8834. o
   8   2 -23   14821.   18884.    6995. <
   8   2 -22   12625.   11105.    6360. <
   8   2 -21   64468.   56725.   10157. o
   8   2 -20    5831.    3694.    4746. <
   8   2 -19  128838.  126585.   14850. o
   8   2 -18    7312.   18126.    7703. <
   8   2 -17   27254.   25880.    6972. o
   8   2 -16   69516.   74777.   11199. o
   8   2 -15   78736.   67634.   10405. o
   8   2 -14   10674.   10812.    4696. <
   8   2 -13   31029.   26247.    4504. o
   8   2 -12   87273.   89649.    8191. o
   8   2 -11   38431.   39284.    5650. o
   8   2 -10  349530.  320610.   15850. o
   8   2  -9  247989.  241625.   12832. o
   8   2  -8   27017.   30307.    5037. o
   8   2  -7    6085.    6164.    3131. <
   8   2  -6   49975.   45766.    6168. o
   8   2  -5   38078.   38012.    6017. o
   8   2  -4    8631.   10689.    3448. o
   8   2  -3     109.    2666.    2299. <
   8   2  -2    5736.    8733.    3155. <
   8   2  -1   18731.   19153.    3522. o
   8   2   0   29071.   31946.    4743. o
   8   2   1  184971.  194367.   10645. o
   8   2   2   41198.   43761.    5428. o
   8   2   3   21830.   22480.    4109. o
   8   2   4    1243.     440.    3253. <
   8   2   5   12494.   10469.    3205. o
   8   2   6   12275.   10249.    3548. <
   8   2   7  261932.  280738.   13432. o
   8   2   8   95635.   94175.   11033. o
   8   2   9   28971.   35542.    5499. o
   8   2  10   60541.   63819.    7629. o
   8   2  11   74049.   73921.    8023. o
   8   2  12     658.    5112.    3571. <
   8   2  13    4479.    3840.    3938. <
   8   2  14    4188.     538.    2936. <
   8   2  15    6623.    7656.    3840. <
   8   2  16    1061.   -4158.    5895. <
   8   2  17   18023.   16682.    6189. <
   8   2  18   32368.   38868.    8876. o
   8   2  19    1599.    3694.    4721. <
   8   2  20   27478.   15998.   10154. <
   8   2  21     498.    5479.    6433. <
   8   2  22    4477.    1835.    4966. <
   8   2  23   16508.   31579.    9731. o
   8   2  24      44.    6482.    5870. <
   8   4 -14    2612.    6409.    7216. <
   8   4 -13    8753.    6164.    8048. <
   8   4 -12   22873.   31579.   12301. <
   8   4 -11    4905.    5504.    5919. <
   8   4 -10   49290.   50512.   14627. o
   8   4  -9   46622.   35591.   13653. <
   8   4  -8    4912.   10004.    7753. <
   8   4  -7    1602.    6556.    7411. <
   8   4  -6   12025.   10836.    8390. <
   8   4  -5    8017.   12524.    8463. <
   8   4  -4    1119.   -1712.    4843. <
   8   4  -3      29.   14432.    5843. <
   8   4  -2     371.    6091.    8537. <
   8   4  -1    8938.    6825.    5553. <
   8   4   0    8903.    1663.    6091. <
   8   4   1   49757.   42586.    8981. o
   8   4   2    8660.   17612.    6871. <
   8   4   3   10130.    5406.    4722. <
   8   4   4     406.    1076.    4819. <
   8   4   5    2639.    6580.    6604. <
   8   4   6    3376.    9589.    7851. <
   8   4   7   67916.   59709.   11893. o
   8   4   8   31819.   30845.    9198. o
   8   4   9    5558.    3743.    6702. <
   8   4  10   13177.   16071.    7313. <
   8   4  11   11060.   15484.   12474. <
   8   4  12    1077.   18346.   11715. <
   9   1 -33   21423.   15019.    9174. <
   9   1 -32    8325.   16315.    6554. <
   9   1 -31     103.    5797.    4965. <
   9   1 -30    4830.    8879.    5552. <
   9   1 -29    1753.    8268.    6751. <
   9   1 -28   37915.   37401.    9320. o
   9   1 -27    1832.    4256.    4672. <
   9   1 -26   79219.   76807.    9102. o
   9   1 -25   12215.    6286.    3964. <
   9   1 -24    2077.    7314.    4989. <
   9   1 -23   52466.   61666.   10047. o
   9   1 -22   59632.   64406.   14625. o
   9   1 -21   11033.   21183.   10369. <
   9   1 -20    3493.    2006.    5039. <
   9   1 -19  233087.  229615.   25981. o
   9   1 -18   48757.   23849.    8035. <
   9   1 -17  174100.  144222.   11350. o
   9   1 -16   26476.   18174.    3968. o
   9   1 -15    6307.    7192.    1908. o
   9   1 -14    8524.    9589.    3082. o
   9   1 -13     544.     856.    1859. <
   9   1 -12   34991.   29402.    4457. o
   9   1 -11    5307.    2764.    2055. <
   9   1 -10  112292.  117070.    6129. o
   9   1  -9   72518.   70374.    5214. o
   9   1  -8  142267.  132480.    6653. o
   9   1  -7     771.    3963.    1687. <
   9   1  -6   50837.   51319.    4207. o
   9   1  -5    3822.    3645.    1835. <
   9   1  -4   44995.   42317.    4455. o
   9   1  -3  200610.  202292.    9487. o
   9   1  -2    8934.   10518.    2763. o
   9   1  -1     214.   -1125.    2348. <
   9   1   0   16939.   16266.    3205. o
   9   1   1    7606.   10983.    2444. o
   9   1   2  875332.  869635.   16450. o
   9   1   3   15732.   15704.    2568. o
   9   1   4   86044.   85858.    5259. o
   9   1   5   75780.   73848.    4847. o
   9   1   6    7031.    7583.    2152. o
   9   1   7   24950.   24706.    4183. o
   9   1   8    1357.   -2055.    4452. <
   9   1   9   95820.  111566.   12190. o
   9   1  10    5192.    3522.    4110. <
   9   1  11   50893.   48873.    8856. o
   9   1  12   64118.   59098.    9739. o
   9   1  13   34365.   19716.    6318. o
   9   1  14   13059.   25170.    6551. o
   9   1  15   38047.   59660.    9917. o
   9   1  16    5979.    2911.    4379. <
   9   1  17     428.  -10347.    6407. <
   9   1  18   39714.   45130.    8729. o
   9   1  19   27587.   26247.    8244. o
   9   1  20     350.    9173.    6212. <
   9   1  21    1523.     416.    5137. <
   9   1  22   19376.   12402.    6337. <
   9   1  23    2415.   -2226.    5406. <
   9   1  24    3791.    5332.    5455. <
   9   1  25   52262.   70007.   17580. o
   9   3 -25    5244.  -21061.   17267. <
   9   3 -24    1006.    2397.    9246. <
   9   3 -23   20817.   27078.    9954. <
   9   3 -22   24486.   22553.    8978. <
   9   3 -21    7251.   14016.    6799. <
   9   3 -20    3878.   -1076.    8635. <
   9   3 -19   73909.   56994.   10872. o
   9   3 -18   12000.   13576.    7240. <
   9   3 -17   57139.   60223.   10810. o
   9   3 -16   12575.    7803.    8073. <
   9   3 -15    1531.    5235.    7729. <
   9   3 -14    2052.    1517.    6042. <
   9   3 -13     472.   -4672.    7607. <
   9   3 -12   10625.   18223.    9856. <
   9   3 -11     793.    1296.    6751. <
   9   3 -10   44956.   42758.   11008. o
   9   3  -9   16284.   16218.    5357. o
   9   3  -8   34531.   29108.    6241. o
   9   3  -7     479.   -8733.    4230. <
   9   3  -6   21946.   18590.    3916. o
   9   3  -5    1202.    2642.    2593. <
   9   3  -4   19379.   14652.    4087. o
   9   3  -3   68719.   64773.    7123. o
   9   3  -2    3636.    3351.    3522. <
   9   3  -1      68.   -1443.    3131. <
   9   3   0    2169.    8219.    3472. <
   9   3   1    1868.    4892.    3938. <
   9   3   2  257470.  263004.   14738. o
   9   3   3   14613.   13136.    3792. o
   9   3   4   26265.   26711.    4892. o
   9   3   5   23170.   21819.    4208. o
   9   3   6    3973.    5014.    3082. <
   9   3   7    7855.    6458.    3327. <
   9   3   8      65.     783.    3840. <
   9   3   9   36156.   39064.    6847. o
   9   3  10    1267.   -2446.    3449. <
   9   3  11   13302.   13674.    5186. <
   9   3  12   16965.   18419.    5307. o
   9   3  13   11581.   14236.    6848. <
   9   3  14    2808.   11252.    5943. <
   9   3  15   12701.    5748.    5749. <
   9   3  16    3247.    7069.    6335. <
   9   3  17     194.   -8757.    6432. <
  10   0 -34    5254.    9515.    8047. <
  10   0 -33    5230.   24803.   12129. <
  10   0 -32    6764.   -1370.    5577. <
  10   0 -31    2863.    8219.    6579. <
  10   0 -30   35381.   27788.   12159. <
  10   0 -29    8176.    5528.    6042. <
  10   0 -28    1766.    9222.    7191. <
  10   0 -27   64477.   90016.   18087. o
  10   0 -26     995.  -15264.    9220. <
  10   0 -25    9681.    1590.    8880. <
  10   0 -24   57519.   55062.   13210. o
  10   0 -23    6293.    5504.    6360. <
  10   0 -22    8985.    6286.    6458. <
  10   0 -21   49917.   47797.   12892. o
  10   0 -20   24332.   17025.    8955. <
  10   0 -19    5944.    5161.    7069. <
  10   0 -18   92796.   97501.   15505. o
  10   0 -17  115728.  105353.   16055. o
  10   0 -16   50024.   47772.   10960. o
  10   0 -15  204844.  221078.   22730. o
  10   0 -14   34609.   49582.   10462. o
  10   0 -13   24292.   23213.    7290. o
  10   0 -12     162.   -4501.    3571. <
  10   0 -11   65168.   75951.    7473. o
  10   0 -10   93747.   94664.    8511. o
  10   0  -9  117357.  119002.    9121. o
  10   0  -8  433194.  433350.   22332. o
  10   0  -7    1578.    4134.    4207. <
  10   0  -6   15595.   12059.    5162. <
  10   0  -5    1964.    2201.    2422. <
  10   0  -4   13145.   19495.    5477. o
  10   0  -3   64090.   61715.    9713. o
  10   0  -2  514092.  502256.   26152. o
  10   0  -1  433112.  446265.   25975. o
  10   0   0   22810.   22504.    7803. <
  10   0   1    9614.    4941.    4428. <
  10   0   2     849.     978.    3743. <
  10   0   3  328480.  327581.   24927. o
  10   0   4   90175.   86543.   13407. o
  10   0   5   17879.   16780.    2447. o
  10   0   6   69886.   64357.    4755. o
  10   0   7     578.     954.    4012. <
  10   0   8   11995.   16584.    7924. <
  10   0   9   95453.  110710.   17381. o
  10   0  10   10356.   52909.   17062. o
  10   0  11   98139.   98039.   17098. o
  10   0  12   23660.   19789.   10006. <
  10   0  13   14535.    8366.    7021. <
  10   0  14   64771.   46940.   13046. o
  10   0  15  141324.  191529.   25496. o
  10   0  16   57154.  110490.   20445. o
  10   0  17     217.    8170.    9637. <
  10   0  18    6635.    4843.    6556. <
  10   0  19       7.    8806.    8243. <
  10   0  20   62944.   76465.   17972. o
  10   0  21   30914.   18052.    8076. <
  10   0  22    8880.   31334.   13987. <
  10   0  23   15757.   12940.    9809. <
  10   0  24    4114.   10396.   10884. <
  10   0  25    1654.     318.    6531. <
  10   0  26    3404.    1321.    7412. <
  10   2 -31    2524.   25660.   12128. <
  10   2 -30   21606.   15900.    9052. <
  10   2 -29    5720.    6971.    8855. <
  10   2 -28    1302.  -13625.    7067. <
  10   2 -27   38440.   39627.   10298. o
  10   2 -26     221.    1394.    5602. <
  10   2 -25    6425.    7485.    5455. <
  10   2 -24   37429.   33707.    8979. o
  10   2 -23    3695.   -1150.    4672. <
  10   2 -22    6199.   12500.    8022. <
  10   2 -21   31004.   27274.    9541. <
  10   2 -20   14612.    5210.    5090. <
  10   2 -19    3685.    2128.    5626. <
  10   2 -18   44191.   56676.   15234. o
  10   2 -17   55725.   52958.   12232. o
  10   2 -16   24338.   20376.    8783. <
  10   2 -15  117352.  102614.   18454. o
  10   2 -14   22516.   25880.   10101. <
  10   2 -13   12391.   10689.    6996. <
  10   2 -12     101.  -11521.    7606. <
  10   2 -11   34222.   37083.    5820. o
  10   2 -10   48872.   50243.    7019. o
  10   2  -9   57098.   58119.    6848. o
  10   2  -8  254732.  252168.   14291. o
  10   2  -7    2068.    6947.    3203. <
  10   2  -6    5715.    8072.    3595. <
  10   2  -5    2027.    3694.    2764. <
  10   2  -4    5860.   11961.    3863. o
  10   2  -3   35159.   40630.    5450. o
  10   2  -2  291103.  300845.   13599. o
  10   2  -1  236681.  252975.   12755. o
  10   2   0   11530.   14383.    3521. o
  10   2   1    6709.    8317.    3375. <
  10   2   2     236.     612.    3522. <
  10   2   3  163390.  163375.   10469. o
  10   2   4   43307.   45864.    6162. o
  10   2   5   11568.   12671.    3595. o
  10   2   6   35597.   36276.    5210. o
  10   2   7     602.    4525.    2715. <
  10   2   8    6349.   12353.    6065. <
  10   2   9   51839.   55086.    9440. o
  10   2  10    5391.     196.    3890. <
  10   2  11   60629.   63990.   10491. o
  10   2  12   10822.    3033.    5382. <
  10   2  13    6154.    1957.    5235. <
  10   2  14   40588.   41730.    9123. o
  10   2  15   80371.  100168.   13021. o
  10   2  16   29860.   49240.   10190. o
  10   2  17     178.   -4256.    5259. <
  10   2  18    3615.    7240.    4696. <
  10   2  19      54.    5088.    5601. <
  10   2  20   38743.   50390.   18000. <
  10   2  21   22538.    7730.    8197. <
  10   4 -13    2638.    2984.    7094. <
  10   4 -12      87.    3620.    6433. <
  10   4 -11    7446.   14456.    8903. <
  10   4 -10   10805.    2495.    6654. <
  10   4  -9   11003.    9564.   10249. <
  10   4  -8   71377.   81920.   19392. o
  10   4  -7    1505.   -7974.    8903. <
  10   4  -6     306.   -1468.   11717. <
  10   4  -5    1137.     294.    5968. <
  10   4  -4     644.   24363.   11248. <
  10   4  -3    9850.   21134.    8559. <
  10   4  -2   79335.   60076.   10582. o
  10   4  -1   59014.   56358.   10031. o
  10   4   0    2449.    9442.    5356. <
  10   4   1    2358.    8121.    5283. <
  10   4   2     142.    8830.    5894. <
  10   4   3   28712.   38330.    7969. o
  10   4   4    6457.   10689.    4402. <
  10   4   5    3574.    6164.    4574. <
  10   4   6    7246.    3058.    5504. <
  10   4   7     957.    7216.    6286. <
  10   4   8    1159.    5871.    6139. <
  10   4   9   10697.   10934.   12328. <
  10   4  10     768.    -318.    7852. <
  11   1 -33    4734.   -7925.    6897. <
  11   1 -32   30000.   54523.   12317. o
  11   1 -31   13884.   37670.    9751. o
  11   1 -30     406.    7901.    6530. <
  11   1 -29     390.   -1517.    4501. <
  11   1 -28     236.   -2422.    7289. <
  11   1 -27   27331.   33291.    8192. o
  11   1 -26    1686.   10347.    5722. <
  11   1 -25  215074.  245955.   20774. o
  11   1 -24   17586.   20180.    9955. <
  11   1 -23    8392.    9124.    4721. <
  11   1 -22      47.    4476.    6971. <
  11   1 -21   12937.   11570.    8170. <
  11   1 -20    1891.    7999.    8439. <
  11   1 -19   65594.   71084.   15995. o
  11   1 -18    3944.    3840.    6409. <
  11   1 -17    2926.   22944.   10025. <
  11   1 -16  117420.  133924.   19629. o
  11   1 -15    3654.    9369.    4402. <
  11   1 -14   33236.   38037.   10736. o
  11   1 -13  175223.  172792.   11110. o
  11   1 -12  108521.  110833.    7065. o
  11   1 -11   31462.   34392.    4082. o
  11   1 -10    9463.   11497.    2910. o
  11   1  -9   24536.   22284.    3720. o
  11   1  -8     717.    1248.    2471. <
  11   1  -7   23526.   20572.    3402. o
  11   1  -6  504794.  512554.   16115. o
  11   1  -5    5430.    6360.    2079. o
  11   1  -4   61891.   63011.    5918. o
  11   1  -3   84774.   84953.    6726. o
  11   1  -2    4442.    4379.    2079. <
  11   1  -1  107332.  109291.    7775. o
  11   1   0   35903.   34563.    4771. o
  11   1   1   95414.  100461.    7697. o
  11   1   2    6108.    5504.    2471. <
  11   1   3     796.      73.    2617. <
  11   1   4  131864.  128347.    8910. o
  11   1   5   68499.   67341.    6728. o
  11   1   6    8335.   16878.    3910. o
  11   1   7   22079.   20572.    5651. o
  11   1   8     821.   -3229.    5895. <
  11   1   9   39495.   40360.    8316. o
  11   1  10  151420.  162494.   15886. o
  11   1  11      68.    5137.    5087. <
  11   1  12    2579.    1737.    5724. <
  11   1  13   12563.   14065.    6849. <
  11   1  14    8092.   13038.    6946. <
  11   1  15   20673.   19177.    6165. o
  11   1  16   35798.   37768.    8658. o
  11   1  17   30694.   33976.    8682. o
  11   1  18    1119.    7779.    5894. <
  11   1  19    3780.    5161.    5528. <
  11   1  20      36.      24.    6115. <
  11   1  21    1557.    3253.    5748. <
  11   1  22    2369.   -4036.    4500. <
  11   1  23    1164.   10885.    7117. <
  11   1  24      45.  -10249.   10297. <
  11   3 -23    3445.   -7338.    9490. <
  11   3 -22      54.     905.    6971. <
  11   3 -21    5506.     294.    6384. <
  11   3 -20     346.    3425.    6311. <
  11   3 -19   24105.   15019.   10055. <
  11   3 -18    3632.    9369.    8732. <
  11   3 -17    3871.    8292.    8903. <
  11   3 -16   37455.   45106.   13500. o
  11   3 -15    1481.    3033.    8904. <
  11   3 -14   13087.    4036.    6190. <
  11   3 -13   69265.   61030.   15561. o
  11   3 -12   45300.   42978.   12378. o
  11   3 -11   11238.    9735.    5871. <
  11   3 -10    3223.    5797.    4452. <
  11   3  -9    9717.    7656.    4330. <
  11   3  -8     192.   -1981.    3180. <
  11   3  -7    7915.    4061.    3058. <
  11   3  -6  159854.  163424.   13840. o
  11   3  -5      88.   -3229.    3302. <
  11   3  -4   14400.   16413.    3888. o
  11   3  -3   32010.   18982.    4411. o
  11   3  -2     675.    -416.    3400. <
  11   3  -1   28596.   34612.    6576. o
  11   3   0   11918.   11668.    4403. <
  11   3   1   30797.   31408.    6311. o
  11   3   2    1346.     269.    3107. <
  11   3   3     648.    3596.    3449. <
  11   3   4   35659.   37841.    6456. o
  11   3   5   16846.   14774.    3890. o
  11   3   6    2209.    8855.    5894. <
  11   3   7    4958.    7656.    3938. <
  11   3   8     323.     807.    5063. <
  11   3   9   17237.   17881.    6335. <
  11   3  10   57648.   68246.   11490. o
  11   3  11     461.    3914.    5234. <
  11   3  12    1354.    3816.    3962. <
  11   3  13    5966.   -3351.    3865. <
  11   3  14    4031.    4892.    5112. <
  11   3  15    7490.    2544.    4942. <
  12   0 -33    1045.   12818.    9367. <
  12   0 -32    4274.   22064.    9854. <
  12   0 -31    1151.   -6556.    9931. <
  12   0 -30   20851.   28057.   12522. <
  12   0 -29    6692.    5822.    8806. <
  12   0 -28     302.   12108.    8927. <
  12   0 -27     110.    9344.    5821. <
  12   0 -26   17747.   19104.    9393. <
  12   0 -25   34942.   33976.   12744. <
  12   0 -24    5002.    3645.    5944. <
  12   0 -23  191614.  220515.   26684. o
  12   0 -22    1544.    4966.    6653. <
  12   0 -21    5602.    4501.    5993. <
  12   0 -20   20914.   36716.   10929. o
  12   0 -19    6278.   11081.    7900. <
  12   0 -18    2320.   -3058.    5601. <
  12   0 -17  118073.  143023.   19524. o
  12   0 -16   60652.   68295.   13400. o
  12   0 -15   18110.   10812.    4626. <
  12   0 -14   85662.   88573.   14772. o
  12   0 -13    9607.   12279.    5821. <
  12   0 -12   65255.   77982.    8720. o
  12   0 -11  218516.  233455.   14011. o
  12   0 -10  130913.  138106.   10874. o
  12   0  -9   12822.   17441.    4230. o
  12   0  -8     944.   -1639.    2788. <
  12   0  -7   14869.   12426.    3866. o
  12   0  -6   30776.   24241.    6436. o
  12   0  -5  319208.  314494.   22023. o
  12   0  -4  289011.  314861.   21972. o
  12   0  -3  171846.  200457.   17918. o
  12   0  -2    3900.   -8684.    5478. <
  12   0  -1  107898.  110441.   14650. o
  12   0   0   12909.   13209.    5063. <
  12   0   1   59173.   58878.    6923. o
  12   0   2    5175.    8757.    2689. o
  12   0   3   12020.   12622.    4232. <
  12   0   4   16796.   13845.    2888. o
  12   0   5   40732.   41975.    6016. o
  12   0   6  119127.  110784.    7110. o
  12   0   7   18912.   14359.    2474. o
  12   0   8   31120.   60785.   14591. o
  12   0   9    6481.    6335.    6286. <
  12   0  10   38014.   37474.   10518. o
  12   0  11  101464.  131135.   20428. o
  12   0  12  140157.  142314.   22625. o
  12   0  13    5728.   16902.    9905. <
  12   0  14    5556.   23605.   11640. <
  12   0  15    6741.   -5724.    5748. <
  12   0  16    6010.    9662.    8561. <
  12   0  17   10078.   -5724.    5919. <
  12   0  18   29692.   50805.   16088. o
  12   0  19    1710.   10420.    8193. <
  12   0  20   18421.   20303.   12206. <
  12   0  21   13483.    1199.    7755. <
  12   0  22      40.   13967.   10052. <
  12   0  23     276.  -13772.    7483. <
  12   0  24    1869.    -489.    6360. <
  12   2 -28     152.   -9980.    9832. <
  12   2 -27     196.    3033.    6286. <
  12   2 -26    8356.   -5430.    5528. <
  12   2 -25   19428.   21330.   10102. <
  12   2 -24    4146.   14554.   10688. <
  12   2 -23  120185.  118171.   21625. o
  12   2 -22     692.   15630.    9856. <
  12   2 -21    3572.    6164.    5014. <
  12   2 -20   12153.   11472.    5602. <
  12   2 -19    3710.    3816.    7510. <
  12   2 -18    2129.   11594.    9343. <
  12   2 -17   66786.   95080.   24718. o
  12   2 -16   39723.   39749.   11472. o
  12   2 -15   11052.   21477.   10149. <
  12   2 -14   44969.   29255.   10378. <
  12   2 -13   10434.    4476.    5309. <
  12   2 -12   38520.   32435.   10300. o
  12   2 -11  129557.  122011.   19159. o
  12   2 -10   74716.   71475.    8491. o
  12   2  -9    7901.    7216.    3474. <
  12   2  -8     915.    3107.    3693. <
  12   2  -7    7250.   11374.    4133. <
  12   2  -6   17911.   14897.    3402. o
  12   2  -5  152278.  154349.   10319. o
  12   2  -4  136479.  139892.    9779. o
  12   2  -3   90497.   95838.    8652. o
  12   2  -2    2228.    1052.    3229. <
  12   2  -1   57814.   63598.    6867. o
  12   2   0    7919.   10910.    3472. o
  12   2   1   30630.   31383.    5087. o
  12   2   2    2916.    5504.    3889. <
  12   2   3    7283.    6580.    3865. <
  12   2   4    8205.   11105.    3913. <
  12   2   5   29941.   33878.    5183. o
  12   2   6   68531.   68026.    7412. o
  12   2   7   13245.   15362.    5992. <
  12   2   8   14377.   17514.    5870. <
  12   2   9    3791.   14212.    5942. <
  12   2  10   22434.    8561.    4628. <
  12   2  11   65735.   78495.   11634. o
  12   2  12   89867.   85295.   12699. o
  12   2  13    4165.     -73.    4281. <
  12   2  14    2803.    9002.    5992. <
  12   2  15    5277.    8292.    6947. <
  12   2  16    2578.   11570.    6554. <
  12   2  17    4911.   -4403.    6482. <
  12   2  18   20272.   29940.    9512. o
  12   2  19     906.    1908.    5797. <
  12   4 -11   35808.   38330.   12743. o
  12   4 -10   17898.    8904.    8465. <
  12   4  -9    2466.    4232.    6580. <
  12   4  -8     470.    3278.    7240. <
  12   4  -7    1069.    5650.    9931. <
  12   4  -6    4633.     783.    4770. <
  12   4  -5   23817.   30992.   11005. <
  12   4  -4   19571.   14921.    7804. <
  12   4  -3   20733.   10934.    7194. <
  12   4  -2     725.    7681.    6041. <
  12   4  -1   12583.    8072.    5505. <
  12   4   0    2462.   14628.    6015. <
  12   4   1    4941.   20914.    7432. <
  12   4   2     739.   10029.    8487. <
  12   4   3    1937.  -11790.   11863. <
  12   4   4    1384.   11007.    6970. <
  12   4   5   11682.   13772.    6677. <
  12   4   6   16684.   35835.   10610. o
  12   4   7    4539.   12010.   11667. <
  12   4   8    1773.   -6140.    8781. <
  13   1 -32   20372.   22944.   10518. <
  13   1 -31     286.     783.    9589. <
  13   1 -30    1784.    2519.    5528. <
  13   1 -29     104.   -5626.    6947. <
  13   1 -28    8591.   14138.    8340. <
  13   1 -27    2092.    1932.    4892. <
  13   1 -26    3090.    9393.    4597. <
  13   1 -25    9789.    4843.    5529. <
  13   1 -24   18753.   12255.    8978. <
  13   1 -23     115.    -294.    5944. <
  13   1 -22   51280.   62791.   15943. o
  13   1 -21  161296.  135122.   20985. o
  13   1 -19   19765.   27078.   12498. <
  13   1 -18   48108.   55942.   14086. o
  13   1 -17     786.    6776.    7289. <
  13   1 -16    8065.   15630.    9367. <
  13   1 -15   63183.   81895.   16207. o
  13   1 -14  337011.  332718.   17108. o
  13   1 -13   81055.   69273.    7645. o
  13   1 -12  162496.  157088.   11677. o
  13   1 -11       3.    5675.    3179. <
  13   1 -10   41583.   47258.    5596. o
  13   1  -9      35.   -2666.    2519. <
  13   1  -8   63834.   67170.    6503. o
  13   1  -7     929.   -1394.    2715. <
  13   1  -6   28819.   28839.    4305. o
  13   1  -5   45680.   48286.    5746. o
  13   1  -4     116.    1810.    2617. <
  13   1  -3  179102.  182748.   10755. o
  13   1  -2   25232.   25244.    4354. o
  13   1  -1   11971.   12769.    3620. o
  13   1   0   14030.   11154.    3279. o
  13   1   1  184551.  187077.   10953. o
  13   1   2   83682.   81161.    7611. o
  13   1   3   28960.   28008.    4477. o
  13   1   4    3134.   11692.    4474. <
  13   1   5   14709.    8561.    3794. <
  13   1   6   27967.   30650.    7435. o
  13   1   7  126946.  111297.   13299. o
  13   1   8   18096.   19031.    6775. <
  13   1   9   31944.   34123.    7557. o
  13   1  10   13230.   30429.    8898. o
  13   1  11   17038.    8610.    5848. <
  13   1  12    3432.   10176.    5258. <
  13   1  13     357.    2422.    6042. <
  13   1  14   31863.   22431.    7856. <
  13   1  15     759.    1101.    4427. <
  13   1  16   21374.   17783.    7364. <
  13   1  17    6620.    7289.    6433. <
  13   1  18   17496.     685.    4113. <
  13   1  19     696.   25439.    8751. <
  13   1  20   18906.   38379.   11833. o
  13   1  21    4027.    2691.    5675. <
  13   1  22     239.    7607.    8463. <
  13   1  23   12957.    8733.    5847. <
  13   3 -22   21914.   19398.   11644. <
  13   3 -21   66820.   49215.   15320. o
  13   3 -20     115.    1883.    5308. <
  13   3 -19    7922.    5993.    7094. <
  13   3 -18   19462.   27568.   10834. <
  13   3 -17     438.    6360.    9760. <
  13   3 -16    1611.     538.    6017. <
  13   3 -15   24989.   24412.   11350. <
  13   3 -14  109246.  100216.   18890. o
  13   3 -13   17983.    8610.    7022. <
  13   3 -12   52644.   50683.   14188. o
  13   3 -11     226.    2324.    6286. <
  13   3 -10   12408.   13894.    6922. <
  13   3  -9      29.   -2226.    3963. <
  13   3  -8   22362.   30283.   10785. <
  13   3  -7     582.  -11154.    8389. <
  13   3  -6    9014.    2324.    4061. <
  13   3  -5   22364.   26760.    9489. <
  13   3  -4     711.   14897.    9367. <
  13   3  -3   53168.   37548.    7716. o
  13   3  -2    7654.    3840.    3548. <
  13   3  -1    2689.    -538.    3840. <
  13   3   0    8873.    3547.    3426. <
  13   3   1   74249.   77859.    8704. o
  13   3   2   31675.   36153.    5965. o
  13   3   3    9758.   14946.    6138. <
  13   3   4    1251.   -3327.    4965. <
  13   3   5   10188.    9197.    4770. <
  13   3   6    8090.   16805.    6578. <
  13   3   7   47420.   51808.   10785. o
  13   3   8   12466.   22480.    7776. <
  13   3   9    8717.    7020.    5088. <
  13   3  10    5436.   10616.    6016. <
  13   3  11    5790.    7094.    5675. <
  13   3  12    1800.   12475.    7777. <
  13   3  13     298.   16291.    7458. <
  14   0 -32   10642.    5308.    9589. <
  14   0 -31   13995.   18590.   11643. <
  14   0 -30   40685.   38428.   14848. <
  14   0 -29     244.   -8048.    7753. <
  14   0 -28     392.  -13282.   10028. <
  14   0 -27    2002.   -9344.    9784. <
  14   0 -26    8190.   13038.    7631. <
  14   0 -25   53753.   70496.   16944. o
  14   0 -24   18692.   21354.   10151. <
  14   0 -23   11862.    7436.    5823. <
  14   0 -22  141300.  175116.   25609. o
  14   0 -21    4482.   -9051.    7484. <
  14   0 -20    5385.   17074.   10859. <
  14   0 -19   55902.   95153.   16904. o
  14   0 -18    5309.  -10274.    8487. <
  14   0 -17    3708.    -294.    6287. <
  14   0 -16   34304.   37058.   11300. o
  14   0 -15   12065.   29793.    9681. o
  14   0 -14  136491.  137837.   11715. o
  14   0 -13   34196.   47234.    7648. o
  14   0 -12  175793.  210609.   14571. o
  14   0 -11   49028.   58926.    8260. o
  14   0 -10  113287.  126879.   11308. o
  14   0  -9   45514.   47772.    7361. o
  14   0  -8   14480.   15239.    4207. o
  14   0  -7  130823.  122672.   10872. o
  14   0  -6    7833.   10836.    4451. <
  14   0  -5   48410.   43296.    6755. o
  14   0  -4  104118.   99972.    9570. o
  14   0  -3   16766.   19544.    5160. o
  14   0  -2    1811.    8439.    4231. <
  14   0  -1   14876.   17636.    4524. o
  14   0   0    6724.   -2886.    4232. <
  14   0   1   56640.   67757.    8135. o
  14   0   2   82390.   63965.    7286. o
  14   0   3  144001.  157088.   11819. o
  14   0   4   73013.   67732.    7784. o
  14   0   5    8170.   11056.    4231. <
  14   0   6    9489.   18810.    9513. <
  14   0   7    6186.   -1419.    6654. <
  14   0   8   33847.   21208.   10033. <
  14   0   9   28953.    8879.    7857. <
  14   0  10    1218.   17392.    9831. <
  14   0  11   19294.   42097.   13862. o
  14   0  12    8814.   27005.   12129. <
  14   0  13    3029.    4061.    6115. <
  14   0  14    6209.   12915.    7802. <
  14   0  15    1171.   -8243.    9025. <
  14   0  16   30906.   32117.   12597. <
  14   0  17    6538.   -1443.    7387. <
  14   0  18    1656.   27861.   13449. <
  14   0  19   45475.   30087.   12969. <
  14   0  20    2277.   19985.   11152. <
  14   0  21   23072.   76489.   21214. o
  14   2 -27     984.  -15044.   11642. <
  14   2 -26    5401.    4281.    7583. <
  14   2 -25   31657.   33830.   12499. <
  14   2 -24   13190.   25855.   11885. <
  14   2 -23    8505.    5186.    7730. <
  14   2 -22   89033.   68931.   16547. o
  14   2 -21    1458.    6042.    7974. <
  14   2 -20    2687.    4427.    4696. <
  14   2 -19   35209.   36104.   11398. o
  14   2 -18    3424.    1810.    5259. <
  14   2 -17    2695.    2153.    4672. <
  14   2 -16   19574.   33512.   11664. <
  14   2 -15    6358.    3204.    4281. <
  14   2 -14   81706.   77321.   15364. o
  14   2 -13   18229.   14848.    6777. <
  14   2 -12   86578.   87203.   15459. o
  14   2 -11   23258.   28839.    9244. o
  14   2 -10   66376.   67879.    8633. o
  14   2  -9   27028.   28937.    5918. o
  14   2  -8    9246.    1737.    3621. <
  14   2  -7   71184.   70545.    7437. o
  14   2  -6    4767.   10249.    3961. <
  14   2  -5   28956.   39920.    6279. o
  14   2  -4   57304.   63892.    7062. o
  14   2  -3   14038.   20131.    4841. o
  14   2  -2    1145.    8977.    4035. <
  14   2  -1    7121.   14481.    4719. o
  14   2   0    6789.   13233.    4499. <
  14   2   1   34119.   41608.    6183. o
  14   2   2   48024.   48702.    6530. o
  14   2   3   90918.  102614.    9060. o
  14   2   4   42283.   30747.    7198. o
  14   2   5    3924.    1199.    4110. <
  14   2   6    6260.   10958.    5111. <
  14   2   7    3736.   -4770.    5161. <
  14   2   8   16690.    8439.    5677. <
  14   2   9   14710.   13160.    6507. <
  14   2  10     854.   10640.    6872. <
  14   2  11   11165.   15728.    6701. <
  14   2  12    4000.   12695.    6089. <
  14   2  13    2709.    5088.    5039. <
  14   2  14    3264.     807.    5137. <
  14   2  15     763.    1394.    6189. <
  14   2  16   19200.   18517.    7485. <
  14   2  17    3716.   -3155.    5112. <
  14   2  18    2116.   -3449.    5308. <
  14   2  19   28502.   13013.   11035. <
  14   4 -10   16714.   13209.   11008. <
  14   4  -9    7790.    5088.    8292. <
  14   4  -8    2651.   -2544.    7363. <
  14   4  -7   15415.   15166.    7705. <
  14   4  -6    1225.    4599.    5455. <
  14   4  -5    7989.   10004.    7362. <
  14   4  -4   13032.    3498.    5407. <
  14   4  -3    6339.    6238.    5528. <
  14   4  -2     333.    3694.    4745. <
  14   4  -1    1257.    2886.    7705. <
  14   4   0    4271.   -6580.    6824. <
  14   4   1    9905.   13600.    8218. <
  14   4   2   12658.    9148.    8464. <
  14   4   3   27514.   30087.   12010. <
  15   1 -30   25469.   22773.    7682. <
  15   1 -29   23472.   38942.   10365. o
  15   1 -28     495.    8855.    9074. <
  15   1 -27   33045.   35860.    9098. o
  15   1 -26    6773.    3033.    4330. <
  15   1 -25     416.    7069.    5185. <
  15   1 -24    2566.    6776.    5454. <
  15   1 -23   51081.   57116.   15824. o
  15   1 -22   46103.   51392.   13671. o
  15   1 -21   16788.   24926.   10785. <
  15   1 -20   99655.   85393.   17792. o
  15   1 -19   48290.   50561.   14260. o
  15   1 -18      91.   -1101.    6115. <
  15   1 -17     747.    1981.    8145. <
  15   1 -16   15058.    9320.    8538. <
  15   1 -15   42334.   60272.    8572. o
  15   1 -14   49069.   47087.    7584. o
  15   1 -13    7042.    9711.    3717. <
  15   1 -12   26590.   26540.    4452. o
  15   1 -11   21449.   26124.    5036. o
  15   1 -10   74178.   74141.    7118. o
  15   1  -9    7897.    5381.    3327. <
  15   1  -8  111290.  127368.    9417. o
  15   1  -7   38570.   36398.    5285. o
  15   1  -6    1780.    1174.    2740. <
  15   1  -5    4700.    6531.    2984. <
  15   1  -4   50500.   49484.    5921. o
  15   1  -3   30159.   33414.    5232. o
  15   1  -2  103304.   94272.    8549. o
  15   1  -1  124453.  121962.    9519. o
  15   1   0   11356.    5846.    3059. <
  15   1   1    1200.     489.    3009. <
  15   1   2      92.    7705.    3692. <
  15   1   3   40723.   36691.    5727. o
  15   1   4    5293.   13307.    6701. <
  15   1   5   47436.   59832.   10217. o
  15   1   6    1421.      73.    4550. <
  15   1   7   67367.   77590.   12468. o
  15   1   8    7245.   21428.    7334. <
  15   1   9   38399.   22773.    6759. o
  15   1  10   42529.   21085.    6664. o
  15   1  11     676.   -1688.    5357. <
  15   1  12  110732.  176486.   18181. o
  15   1  13     965.   -2422.    5675. <
  15   1  14   10368.   37670.    9432. o
  15   1  15   19980.   14236.    6508. <
  15   1  16    2499.    6874.    6433. <
  15   1  17     235.   -2471.    5283. <
  15   1  18    4475.    -660.    4917. <
  15   1  19   12001.   29671.   13352. <
  15   1  20   14571.   16780.   10469. <
  15   3 -20   31694.   31652.   12084. <
  15   3 -19   13889.   17098.   10151. <
  15   3 -18      58.   10640.    8365. <
  15   3 -17     599.    7607.    5796. <
  15   3 -16    4985.    2984.    6140. <
  15   3 -15   17287.    7779.    4993. <
  15   3 -14   20734.   25586.   10297. <
  15   3 -13    1888.    2691.    5112. <
  15   3 -12   15200.   23140.   10296. <
  15   3 -11    4244.       0.    6482. <
  15   3 -10   26924.   21110.   10936. <
  15   3  -9    3591.   -4427.    6164. <
  15   3  -8   46301.   35958.   11305. o
  15   3  -7   14505.   32215.   13352. <
  15   3  -6    1002.    9662.    7509. <
  15   3  -5     776.    9711.    8365. <
  15   3  -4   21503.   21819.    9197. <
  15   3  -3   12998.   12622.    7192. <
  15   3  -2   37856.   40507.    7752. o
  15   3  -1   48385.   44788.    6803. o
  15   3   0    2677.    -391.    3204. <
  15   3   1    2031.    -538.    4183. <
  15   3   2      93.   12010.    6064. <
  15   3   3   12144.   11864.    6213. <
  15   3   4    2390.    6556.    5063. <
  15   3   5   16021.   22284.    6920. o
  15   3   6     791.  -10494.    6897. <
  15   3   7   24729.   32484.    9243. o
  15   3   8    2966.   10004.    6163. <
  15   3   9   13132.   29671.    9731. o
  15   3  10   12390.   11301.    7290. <
  15   3  11     283.     807.    5430. <
  15   3  12   41053.   64504.   16379. o
  15   3  13    1209.    6091.    8072. <
  16   0 -30     195.   12353.   11104. <
  16   0 -29   39156.   50414.   15749. o
  16   0 -28   41159.   49754.   15701. o
  16   0 -27   20842.   21942.   10004. <
  16   0 -26    1616.   13478.    9245. <
  16   0 -25   15032.    9638.   11302. <
  16   0 -24     198.    1932.    7656. <
  16   0 -23   31666.   40043.   14136. <
  16   0 -22    8031.    3376.    7730. <
  16   0 -21    1026.   10225.    8756. <
  16   0 -20   98316.  109438.   19219. o
  16   0 -19    9641.   13405.    9172. <
  16   0 -18   61909.   63207.   15508. o
  16   0 -17   68923.   79889.   16432. o
  16   0 -16   23965.   20449.    9516. <
  16   0 -15      50.   14041.    5501. <
  16   0 -14   41745.   51710.    8481. o
  16   0 -13   22054.   25611.    6481. o
  16   0 -12  128568.  135416.   12246. o
  16   0 -11   18872.   22284.    5698. o
  16   0 -10    2558.   -2373.    3498. <
  16   0  -9   64747.   63965.    8709. o
  16   0  -8    9505.   10445.    4403. <
  16   0  -7    7907.    5357.    3450. <
  16   0  -6   97136.  105109.   10729. o
  16   0  -5  135446.  143341.   12171. o
  16   0  -4     428.    3082.    3620. <
  16   0  -3    9653.    9051.    3767. <
  16   0  -2   22223.   22871.    5406. o
  16   0  -1   23467.   25953.    5356. o
  16   0   0   28382.   20376.    5679. o
  16   0   1  147334.  141164.   11921. o
  16   0   2    1204.    4525.    3742. <
  16   0   3    2854.    8904.    4353. <
  16   0   4   24186.   36153.   11150. o
  16   0   5   15621.    3253.    8073. <
  16   0   6   22535.   17832.    7853. <
  16   0   7   31968.   38868.   11763. o
  16   0   8   39614.   28424.    9324. o
  16   0   9    7764.   12328.    8756. <
  16   0  10    7971.    1101.    5455. <
  16   0  11   33038.   24216.   10594. <
  16   0  12    4919.   -5797.    6946. <
  16   0  13     112.    -563.    9344. <
  16   0  14   40360.   83167.   19330. o
  16   0  15   14672.    2422.    7706. <
  16   0  16     243.   17587.   12057. <
  16   0  17   10046.    1835.    9345. <
  16   0  18     614.    4427.   10347. <
  16   2 -25   10299.   12891.    8757. <
  16   2 -24     103.   -7779.    8194. <
  16   2 -23   20729.   15019.    8245. <
  16   2 -22    5814.    8610.    9858. <
  16   2 -21    1212.    6751.    9906. <
  16   2 -20   53220.   42660.   13164. o
  16   2 -19    3859.    -563.    6947. <
  16   2 -18   36364.   25537.   11109. <
  16   2 -17   43247.   52028.   15529. o
  16   2 -16   14895.   11790.    5774. <
  16   2 -15     127.   -3963.    7754. <
  16   2 -14   25736.   35517.   12203. <
  16   2 -13   14599.   10102.    5994. <
  16   2 -12   76424.   75658.   15802. o
  16   2 -11   15063.   13062.    5724. <
  16   2 -10    1221.    1859.    5993. <
  16   2  -9   39420.   45130.    8019. o
  16   2  -8    8888.   10885.    3595. o
  16   2  -7    3676.   17343.    6577. <
  16   2  -6   58469.   64699.    7283. o
  16   2  -5   83181.   80330.    8247. o
  16   2  -4      85.    6433.    3913. <
  16   2  -3    5143.   -1957.    3058. <
  16   2  -2   12337.    5895.    2986. <
  16   2  -1   11301.   16315.    4352. o
  16   2   0   15220.    7925.    4014. <
  16   2   1   78307.   63916.   10285. o
  16   2   2     236.   -1517.    6066. <
  16   2   3    1991.   -6971.    5112. <
  16   2   4   13767.   16536.    7166. <
  16   2   5    8536.   10225.    5454. <
  16   2   6   14048.   24608.    8167. o
  16   2   7   18622.   19495.    7240. <
  16   2   8   25632.   31946.    9391. o
  16   2   9    5341.    4794.    5284. <
  16   2  10    6150.   23067.    8924. <
  16   2  11   20223.   17514.    8195. <
  16   2  12    2849.    -954.    4745. <
  16   2  13       6.   -4476.    5136. <
  16   2  14   24193.   41217.   11294. o
  16   2  15    9174.   -7045.    7020. <
  16   2  16     370.    7656.    7754. <
  16   4  -8    5507.   12818.   10052. <
  16   4  -7     590.    -465.    4452. <
  16   4  -6   15435.   12573.    7901. <
  16   4  -5   22915.   31750.   11714. <
  17   1 -28    8822.   13551.    7558. <
  17   1 -27   51983.   56187.   11910. o
  17   1 -26   13009.   30185.    8629. o
  17   1 -25   12826.    5430.    6434. <
  17   1 -24   21629.   18908.    7168. <
  17   1 -23   10532.   16707.    6529. <
  17   1 -22    4473.   15948.    8657. <
  17   1 -21   22540.   37205.   14232. <
  17   1 -20    5572.    3131.    6067. <
  17   1 -19    5035.    2837.    6140. <
  17   1 -18   27616.   24118.    9370. <
  17   1 -17    3971.    9907.    6506. <
  17   1 -16   32336.   35004.   11422. o
  17   1 -15    1176.    4672.    3938. <
  17   1 -14   19381.   15973.    4674. o
  17   1 -13   24495.   23336.    5235. o
  17   1 -12   25137.   25121.    4721. o
  17   1 -11    5857.    2911.    3498. <
  17   1 -10   86715.   99263.    8643. o
  17   1  -9   18806.   26516.    5353. o
  17   1  -8  101812.  101709.    9026. o
  17   1  -7   42964.   49558.    6476. o
  17   1  -6   19701.   22773.    4842. o
  17   1  -5   78201.   91362.    8668. o
  17   1  -4     648.    5357.    3155. <
  17   1  -3   21775.   31848.    5448. o
  17   1  -2      26.   -1639.    3522. <
  17   1  -1    5660.    2030.    3400. <
  17   1   0   21137.   26980.    5231. o
  17   1   1     476.    4696.    5063. <
  17   1   2   25172.   12842.    5802. <
  17   1   3  107201.   81479.   11472. o
  17   1   4   50356.   73138.   11652. o
  17   1   5     340.   -4452.    4354. <
  17   1   6   15542.   45253.    9894. o
  17   1   7      40.     147.    5846. <
  17   1   8    6860.    1981.    4330. <
  17   1   9   20522.   20107.    7265. <
  17   1  10   34398.   30968.    9297. o
  17   1  11   32364.   44519.   10537. o
  17   1  12   25544.   31481.    9856. o
  17   1  13    4930.     416.    7387. <
  17   1  14     100.    2813.    5650. <
  17   1  15    1622.   12695.    7753. <
  17   1  16   11747.   24045.   12155. <
  17   3 -18    9743.   12035.   10909. <
  17   3 -17    1179.      49.    6800. <
  17   3 -16   13789.    7510.    8269. <
  17   3 -15     870.    2740.    7412. <
  17   3 -14    8421.   24510.   12766. <
  17   3 -13   11667.    8928.    8929. <
  17   3 -12   11429.   29353.   12202. <
  17   3 -11    3809.   -2691.    4770. <
  17   3 -10   29334.   22773.   12012. <
  17   3  -9    6462.    9882.    5185. <
  17   3  -8   30762.   28228.   10372. <
  17   3  -7   11501.    7216.    5064. <
  17   3  -6    5791.   11668.    8389. <
  17   3  -5   28792.   28448.   10396. <
  17   3  -4     877.   -2715.    4599. <
  17   3  -3    7854.   20841.    8509. <
  17   3  -2      44.  -14187.    8413. <
  17   3  -1    2794.   -4672.    5577. <
  17   3   0    9468.     -98.    5137. <
  17   3   1     434.    -196.    5675. <
  17   3   2    5718.   -5210.    4916. <
  17   3   3   39778.   25415.    7541. o
  17   3   4   18670.   34490.    8653. o
  17   3   5     978.   -7485.    6922. <
  17   3   6    5798.    9589.    6139. <
  17   3   7       4.   -4794.    5699. <
  17   3   8    2229.    9148.    6359. <
  18   0 -28   16503.   18444.   10885. <
  18   0 -27    9880.    7338.    6262. <
  18   0 -26     609.   -8561.   10028. <
  18   0 -25   30899.   35811.   14039. <
  18   0 -24   34502.   26393.   11401. <
  18   0 -23    2724.    3009.    7681. <
  18   0 -22   15832.    4109.    6288. <
  18   0 -21   77510.   96890.   20145. o
  18   0 -20   97698.  122843.   21632. o
  18   0 -19     112.   -7436.    8439. <
  18   0 -18     131.  -10371.    9661. <
  18   0 -17   45734.   57948.   14157. o
  18   0 -16    3541.    2837.    4183. <
  18   0 -15   32124.   32655.    7191. o
  18   0 -14   88544.  105916.   11772. o
  18   0 -13    2159.   -4794.    4060. <
  18   0 -12    1774.    2715.    3865. <
  18   0 -11    4734.    4794.    5063. <
  18   0 -10    5694.    1908.    5284. <
  18   0  -9    9925.   14505.    5135. <
  18   0  -8   38124.   32753.    7317. o
  18   0  -7  112354.  127686.   12384. o
  18   0  -6   31777.   41877.    7675. o
  18   0  -5   11626.   19202.    5697. o
  18   0  -4    2153.   12671.    5551. <
  18   0  -3   76633.   84146.   10364. o
  18   0  -2     502.    -930.    4256. <
  18   0  -1  148218.  166065.   13845. o
  18   0   0   20252.   14970.    5114. <
  18   0   1    4029.    4525.    5920. <
  18   0   2   15212.     636.    5334. <
  18   0   3   10920.    4281.    4893. <
  18   0   4    1780.   -3376.    5993. <
  18   0   5    1323.   12084.    7068. <
  18   0   6   79558.  103421.   20534. o
  18   0   7    8241.   -3987.    6140. <
  18   0   8    8076.   21330.    9317. <
  18   0   9     886.   -2519.    8732. <
  18   0  10   38455.   37254.   13992. <
  18   0  11     272.   -1786.    7901. <
  18   0  12     480.    1663.    6947. <
  18   0  13    1741.    5284.    8072. <
  18   0  14   14241.    3522.    6459. <
  18   0  15     378.   28986.   14085. <
  18   2 -23    2492.    7925.    8977. <
  18   2 -22   10593.   18713.    9734. <
  18   2 -21   50113.   55453.   14430. o
  18   2 -20   60794.   62571.   15654. o
  18   2 -19      25.   13478.    9881. <
  18   2 -18      90.   -9564.    7484. <
  18   2 -17   28317.   17685.    8222. <
  18   2 -16    1403.   -6556.    5968. <
  18   2 -15   18737.   17343.    8782. <
  18   2 -14   56425.   52469.   14311. o
  18   2 -13    1676.   -2593.    7143. <
  18   2 -12     940.    1957.    6115. <
  18   2 -11    3207.     196.    4330. <
  18   2 -10    2760.    3987.    5210. <
  18   2  -9    5925.    8830.    3864. <
  18   2  -8   24462.   17294.    5849. <
  18   2  -7   63310.   67414.    7750. o
  18   2  -6   15217.   21428.    5158. o
  18   2  -5    6626.    6482.    3498. <
  18   2  -4     721.     -98.    3449. <
  18   2  -3   45758.   54548.    7674. o
  18   2  -2     158.    7216.    5185. <
  18   2  -1   91520.   96205.   12544. o
  18   2   0   12904.    6727.    4894. <
  18   2   1    2627.   10763.    5404. <
  18   2   2   12338.   24485.    7628. o
  18   2   3    5776.    1003.    3865. <
  18   2   4    1065.    3645.    4403. <
  18   2   5    1629.   -3767.    4623. <
  18   2   6   47006.   70301.   12510. o
  18   2   7    5515.    -660.    5479. <
  18   2   8    5789.    6971.    6042. <
  18   2   9     306.     563.    6091. <
  18   2  10   23687.   12989.    7512. <
  18   2  11     236.   -4868.    7142. <
  18   2  12     367.   -1443.    6091. <
  19   1 -26    3741.   -4207.    5724. <
  19   1 -25   29506.   33414.    9930. o
  19   1 -24   40600.   53814.   11441. o
  19   1 -23    2164.    1981.    5553. <
  19   1 -22   24845.   34514.    9193. o
  19   1 -21     250.    2299.    8561. <
  19   1 -20    1234.   -8145.    7778. <
  19   1 -19   13228.   13943.    7803. <
  19   1 -18   51590.   59489.   16948. o
  19   1 -17    2833.     489.    6384. <
  19   1 -16   38066.   46965.   13499. o
  19   1 -15   19351.   22137.    9833. <
  19   1 -14   92231.   96670.   11908. o
  19   1 -13   14443.   12793.    4355. <
  19   1 -12   43412.   46158.    6333. o
  19   1 -11   93816.   98847.    9117. o
  19   1 -10     187.   -2079.    4158. <
  19   1  -9     274.    8048.    3864. <
  19   1  -8      23.    -342.    3596. <
  19   1  -7     328.     -49.    2446. <
  19   1  -6    3367.    -342.    3327. <
  19   1  -5   77352.   79033.    8584. o
  19   1  -4    3830.    3669.    3425. <
  19   1  -3    5720.    2104.    3131. <
  19   1  -2   19753.   39431.    6397. o
  19   1  -1     334.    9320.    4622. <
  19   1   0    3760.    2348.    3498. <
  19   1   1   90085.   90285.   12964. o
  19   1   2   22761.   21501.    7339. <
  19   1   3   15829.   29157.    8410. o
  19   1   4   19278.   12793.    5970. <
  19   1   5     100.    6825.    4965. <
  19   1   6     271.    -514.    5773. <
  19   1   7     334.   -2226.    4599. <
  19   1   8    7225.   19006.    7140. <
  19   1   9     260.   15948.    7140. <
  19   1  10     832.    7558.    7582. <
  19   1  11     324.   10567.    7924. <
  19   1  12     316.  -12573.    8242. <
  19   1  13    6859.    3791.    7314. <
  19   3 -16   13368.    1590.    8464. <
  19   3 -15    4714.    7143.    6090. <
  19   3 -14   33199.   41730.   14918. <
  19   3 -13    6983.   12964.   10126. <
  19   3 -12   17598.    1443.    6240. <
  19   3 -11   36849.   36129.   13405. <
  19   3 -10     336.    7779.    7876. <
  19   3  -9     122.    4158.    7240. <
  19   3  -8       5.   -8097.    6971. <
  19   3  -7     198.   -7338.    6946. <
  19   3  -3    3353.    3302.    6678. <
  19   3  -2    7954.    3547.    6287. <
  19   3   2   10342.    7338.    9124. <
  19   3   3    6962.   43345.   16356. <
  19   3   4    8899.   -8781.    9759. <
  19   3   5     158.    9735.    7411. <
  20   0 -26    2121.    4892.    8317. <
  20   0 -25   12437.   11399.    9124. <
  20   0 -24    2645.  -20058.   12472. <
  20   0 -23   47648.   49118.   15190. o
  20   0 -22    9684.    7901.    8977. <
  20   0 -21    1205.  -10665.    9563. <
  20   0 -20    1015.    1614.    7094. <
  20   0 -19     964.    -465.    6140. <
  20   0 -18    6053.     489.    7779. <
  20   0 -17    4005.   -8072.    6041. <
  20   0 -16   36534.   33805.    6826. o
  20   0 -15   23433.   35860.    8164. o
  20   0 -14   36635.   36349.    7436. o
  20   0 -13   18541.   19887.    5356. o
  20   0 -12   21864.   28081.    7066. o
  20   0 -11    4011.    3033.    4158. <
  20   0 -10   42916.   34832.    7172. o
  20   0  -9   64834.   58119.    9325. o
  20   0  -8    1960.    4207.    3644. <
  20   0  -7   16344.   22969.    6382. o
  20   0  -6     754.     807.    3840. <
  20   0  -5    1369.    3082.    3620. <
  20   0  -4    7701.    3816.    3719. <
  20   0  -3   23582.   17685.    4724. o
  20   0  -2   23166.   31726.    6575. o
  20   0  -1   13866.    2935.    5848. <
  20   0   0    1578.   11643.    9172. <
  20   0   1   36508.   45938.   12740. o
  20   0   2     121.    4745.    6408. <
  20   0   3   13506.   12915.    9956. <
  20   0   4   21111.   20865.    9344. <
  20   0   5     643.  -10127.    9294. <
  20   0   6   40888.   14750.    8765. <
  20   0   7    3640.   -8219.    9441. <
  20   0   8    3046.    8659.    7166. <
  20   0   9   11868.   27127.   14209. <
  20   0  10     510.    6604.    8806. <
  20   0  11    2692.    3058.    6409. <
  20   2 -21     900.   19128.   11763. <
  20   2 -20     890.    -440.    6971. <
  20   2 -19     606.   -7632.    6848. <
  20   2 -18    3936.     954.    8928. <
  20   2 -17    2832.   37034.   17239. <
  20   2 -16   24591.   31775.   13232. <
  20   2 -15   12340.   27592.   12496. <
  20   2 -14   19519.   14163.    9345. <
  20   2 -13    9646.    7925.    4966. <
  20   2 -12   13390.    8635.    8048. <
  20   2 -11    1756.   -3009.    6604. <
  20   2 -10   27694.   36227.    8313. o
  20   2  -9   39253.   40825.    8096. o
  20   2  -8    1514.   -4452.    4011. <
  20   2  -7   10822.    8708.    4893. <
  20   2  -6     754.     612.    3082. <
  20   2  -5     585.    1859.    5235. <
  20   2  -4    6238.    5332.    5137. <
  20   2  -3   16795.   21721.    7973. <
  20   2  -2   12334.   30454.    8971. o
  20   2  -1    8857.   -7510.    5772. <
  20   2   0     946.    8121.    6995. <
  20   2   1   23117.   34637.    8899. o
  20   2   2      93.   -1957.    4868. <
  20   2   3    8419.   10812.    6359. <
  20   2   4   12056.   25024.    9267. <
  20   2   5     607.    9246.    7044. <
  20   2   6   24370.   14995.    7268. <
  20   2   7    1500.   -5235.    5356. <
  20   2   8    2027.  -14921.   11593. <
  21   1 -24   13505.    8610.    9834. <
  21   1 -23    3042.   11864.    7973. <
  21   1 -22   23082.   33878.    9585. o
  21   1 -21   46212.   44984.   10348. o
  21   1 -20   25336.   17808.    6289. <
  21   1 -19     794.    3351.    6115. <
  21   1 -18    2066.    7020.    8903. <
  21   1 -17    1643.    2104.    9002. <
  21   1 -16    6640.   -1688.    5210. <
  21   1 -15    5619.   14921.    5844. <
  21   1 -14   22413.   19593.    6288. o
  21   1 -13   30507.   28399.    7119. o
  21   1 -12   12540.   24339.    5964. o
  21   1 -11   49776.   41584.    7027. o
  21   1 -10    5337.    4403.    3107. <
  21   1  -9     158.    2886.    3693. <
  21   1  -8   26772.   28913.    5478. o
  21   1  -7   35770.   29940.    5923. o
  21   1  -6    1457.   -8268.    4230. <
  21   1  -5   38276.   43540.    6796. o
  21   1  -4    1358.    2740.    5993. <
  21   1  -3   24603.   18052.    6729. <
  21   1  -2     462.   -2324.    5993. <
  21   1  -1   11105.   14383.    6261. <
  21   1   0     911.   -2055.    4623. <
  21   1   1   21552.   17343.    6117. <
  21   1   2   14703.   10469.    7143. <
  21   1   3    1385.   12769.    6309. <
  21   1   4    2358.    7828.    5430. <
  21   1   5    3806.   -4354.    6091. <
  21   1   6      17.   -7558.    5552. <
  21   1   7      12.    1492.    7730. <
  21   1   8   59758.   60908.   12841. o
  21   3 -13   10378.   48017.   14127. o
  21   3 -12    5927.    9369.    8218. <
  21   3 -11   24963.   25806.   11692. <
  21   3 -10    2403.  -11864.    8878. <
  22   0 -24   15519.   -1101.    7633. <
  22   0 -23     122.   16218.    9954. <
  22   0 -22   10142.   18517.   11397. <
  22   0 -21   12294.    6702.    7853. <
  22   0 -20    9822.    2715.    6018. <
  22   0 -19    6909.   12891.    9637. <
  22   0 -18    6604.    8243.    6898. <
  22   0 -17   17658.   11497.    4454. <
  22   0 -16    9190.   11986.    5821. <
  22   0 -15   14269.   12597.    6214. <
  22   0 -14    1268.     954.    5161. <
  22   0 -13   14124.   18982.    6383. <
  22   0 -12   27361.   29842.    8193. o
  22   0 -11     561.   15900.    6308. <
  22   0 -10    7349.    5797.    4501. <
  22   0  -9    9485.    9687.    4941. <
  22   0  -8    3541.    6996.    4916. <
  22   0  -7    9146.    7852.    4526. <
  22   0  -6    1341.    7216.    3521. <
  22   0  -5    4478.   13136.    5428. <
  22   0  -4    3921.    -122.    5700. <
  22   0  -3   28550.   30160.   11912. <
  22   0  -2   34610.   43810.   14845. <
  22   0  -1   10001.   19128.   11568. <
  22   0   0    6748.    9809.    9539. <
  22   0   1   13790.   31506.   13107. <
  22   0   2     765.    8830.    8512. <
  22   0   3   25130.   33487.    9537. o
  22   0   4   45325.   36496.   12185. <
  22   0   5     372.    9809.    8291. <
  22   0   6      15.  -13111.   10395. <
  22   0   7    3822.    3840.    8121. <
  22   2 -19    4335.    8341.    6115. <
  22   2 -18    4695.    8733.    7215. <
  22   2 -17   10905.   10371.    6849. <
  22   2 -16    6213.    7314.    8463. <
  22   2 -15    9452.    3767.    7877. <
  22   2 -14     414.    2446.    5430. <
  22   2 -13    8644.    7925.    6189. <
  22   2 -12   18270.    9124.    6924. <
  22   2 -11     238.   10200.    6261. <
  22   2 -10    3715.   13576.    6529. <
  22   2  -9    6457.   14701.    6456. <
  22   2  -8    1851.    5528.    8634. <
  22   2  -7    6311.   13136.    8169. <
  22   2  -6     861.   -3058.    7632. <
  22   2  -5    2929.   -3009.    8488. <
  22   2  -4    2512.   -1248.    6189. <
  22   2  -3   17960.   27641.    8240. o
  22   2  -2   21478.    9858.    6510. <
  22   2  -1    4605.   -3816.    4525. <
  22   2   0    3969.   23238.   13940. <
  22   2   1    8383.   24975.   11053. <
  22   2   2     136.   -7583.    9319. <
  22   2   3   16442.   26662.   14821. <
  22   2   4   28636.   44079.   16751. <
  23   1 -21   26116.   23605.    9565. <
  23   1 -20   17450.    7069.    5677. <
  23   1 -19    8152.   16780.    8070. <
  23   1 -18    1908.    7681.    6726. <
  23   1 -17    5072.    5822.    5822. <
  23   1 -16    6498.    4183.    4501. <
  23   1 -15    4685.    4403.    4672. <
  23   1 -14   10642.   15484.    5992. <
  23   1 -13    6181.   12206.    5062. <
  23   1 -12   16656.   14995.    6483. <
  23   1 -11    2676.    -636.    4794. <
  23   1 -10   12197.   16878.    4744. o
  23   1  -9    7216.    2911.    4575. <
  23   1  -8    5230.    2911.    5161. <
  23   1  -7   52635.   53570.    9270. o
  23   1  -6     310.    5748.    4623. <
  23   1  -5   33928.   38086.    8755. o
  23   1  -4    2165.   14408.    7140. <
  23   1  -3    6948.    2544.    5064. <
  23   1  -2    1985.    7974.    5674. <
  23   1  -1    5719.   10787.    6530. <
  23   1   0   50910.   55428.   11421. o
  23   1   1     364.    8390.    5454. <
  23   1   2     171.    2275.    4843. <
  23   1   3   12432.   14897.   11570. <
  23   1   4     488.     636.    7705. <
  24   0 -21   14715.   18541.   12915. <
  24   0 -20    1352.    8194.    7166. <
  24   0 -19    2240.   14774.   13232. <
  24   0 -18   29234.   18297.    8442. <
  24   0 -17    1771.  -10665.    9832. <
  24   0 -16   28701.   36153.    8338. o
  24   0 -15   19872.   18248.    6507. <
  24   0 -14    1517.   -6580.    5503. <
  24   0 -13    2613.     440.    4476. <
  24   0 -11   43382.   47821.    9537. o
  24   0 -10    3003.   13429.    6089. <
  24   0  -9    6741.   14554.    9000. <
  24   0  -8   24852.   26834.   10689. <
  24   0  -7     266.  -12255.   10468. <
  24   0  -6     465.   13454.    8804. <
  24   0  -5   46648.   55722.   14452. o
  24   0  -4   12808.   23140.   10883. <
  24   0  -3    2778.   28375.   15896. <
  24   0  -2    6873.   17392.   10859. <
  24   0  -1   13945.   17441.   11863. <
  24   0   0    2406.   -3376.    9344. <
  24   0   1    4527.    9051.    8487. <
  24   0   2   25896.   20009.   10642. <
  24   2 -16   18708.   27201.   11446. <
  24   2 -15   13194.   13062.    9687. <
  24   2 -14     878.   -2960.    6922. <
  24   2 -13    1741.   18541.   11764. <
  24   2 -12    7582.    7779.    5137. <
  24   2  -2    4752.   11766.    9050. <
  24   2  -1    9215.   -3327.    6433. <
  24   2   0    1630.    8268.    7851. <
  25   1 -18    7057.    5332.    7608. <
  25   1 -17    5780.    -489.    6874. <
  25   1 -16   17744.   11986.    4307. <
  25   1 -15    4818.    3253.    5333. <
  25   1 -14   10593.   10053.    5259. <
  25   1 -13    2378.    3889.    4134. <
  25   1 -12    5375.    9148.    5674. <
  25   1 -11      21.    5259.    5748. <
  25   1 -10    3707.    2104.    6287. <
  25   1  -9   22950.   21403.    6238. o
  25   1  -8   18879.   24290.    6602. o
  25   1  -7     222.   -2593.    6066. <
  25   1  -6    1113.   -6849.    5821. <
  25   1  -5    2231.   12964.    7165. <
  25   1  -4    2207.    7485.    7485. <
  25   1  -3   16455.   33683.   13572. <
  25   1  -2     946.  -20694.   10662. <
  25   1  -1    3213.   21966.   11934. <
  25   1   0    2555.   -2299.    6262. <
  26   0 -18     803.  -29696.   12812. <
  26   0 -17     297.    9784.   10371. <
  26   0 -16    9205.   23482.   13574. <
  26   0 -15    1775.    6898.    9931. <
  26   0 -14   15614.   18517.    7019. <
  26   0 -13   38798.   46990.   10734. o
  26   0 -12    3955.    9442.    5111. <
  26   0 -11    1101.   -7999.    7680. <
  26   0 -10   14020.   14090.    7901. <
  26   0  -9     197.   -2984.    6482. <
  26   0  -8    3953.   13747.    7924. <
  26   0  -7   11488.   10127.    9760. <
  26   0  -6    4321.    1174.    7069. <
  26   0  -5    2307.  -15288.   11250. <
  26   0  -4    1258.    3131.    8170. <

loop_
 _twin_refln_datum_id
 _twin_refln_individual_id
 _twin_refln_index_h
 _twin_refln_index_k
 _twin_refln_index_l
 _twin_refln_F_squared_calc
 _twin_refln_F_squared_meas
 _twin_refln_F_squared_sigma
 _twin_refln_include_status
 ? ? ? ? ? ? ? ? ?
